# Supplementary material for: A liquid-like organelle at the root of motile ciliopathy
Source: eLife. 2018 Dec 18;7:e38497. doi: 10.7554/eLife.38497 (PMC6349401; doi:10.7554/eLife.38497)
Supplement: Figure 1—source data 1. [file elife-38497-fig1-data1.xlsx]

## Sheet: dnaaf3
Gene	cell number	focus number	Costes P-Value	Pearson R value	Spearman's Rank Correlation	Kendall's Tau Rank Correlation	Manders Tm2
DNAAF3	1	1	1	0.54	0.68072	0.4933	0.768
DNAAF3	1	2	1	0.6	0.585154	0.4162	0.592
DNAAF3	1	3	1	0.67	0.686027	0.4827	0.752
DNAAF3	1	4	0.97	0.41	0.415259	0.2928	0.505
DNAAF3	1	5	1	0.67	0.695119	0.5051	0.744
DNAAF3	1	6	1	0.63	0.621904	0.4443	0.627
DNAAF3	1	7	1	0.47	0.469226	0.3306	0.533
DNAAF3	1	8	1	0.43	0.642671	0.4577	0.703
DNAAF3	2	9	1	0.53	0.510802	0.3611	0.543
DNAAF3	2	10	1	0.26	0.305646	0.2103	0.349
DNAAF3	2	11	0.98	0.45	0.415291	0.2911	0.434
DNAAF3	2	12	1	0.46	0.648096	0.4659	0.745
DNAAF3	2	13	1	0.36	0.316216	0.2213	0.41
DNAAF3	2	14	1	0.68	0.67478	0.4858	0.716
DNAAF3	2	15	0.99	0.63	0.574158	0.4132	0.589
DNAAF3	2	16	0.96	0.67	0.704824	0.5089	0.782
DNAAF3	3	17	1	0.86	0.846348	0.6566	0.831
DNAAF3	3	18	1	0.87	0.885624	0.7087	0.985
DNAAF3	3	19	1	0.74	0.752545	0.5648	0.932
DNAAF3	3	20	1	0.57	0.7176	0.5362	0.858
DNAAF3	3	21	1	0.66	0.561459	0.4101	0.514
DNAAF3	3	22	1	0.59	0.732328	0.5456	0.75
DNAAF3	3	23	1	0.78	0.787072	0.5946	0.769
DNAAF3	3	24	1	0.79	0.786421	0.5908	0.737
DNAAF3	4	25	1	0.77	0.763953	0.5716	0.842
DNAAF3	4	26	1	0.54	0.579354	0.4065	0.668
DNAAF3	4	27	0.99	0.62	0.64	0.4601	0.736
DNAAF3	4	28	1	0.79	0.777671	0.5775	0.73
DNAAF3	4	29	0.96	0.68	0.657804	0.4768	0.72
DNAAF3	4	30	1	0.76	0.772399	0.5815	0.937
DNAAF3	5	31	1	0.59	0.550128	0.3893	0.573
DNAAF3	5	32	1	0.56	0.575916	0.4088	0.614
DNAAF3	5	33	1	0.67	0.682112	0.4882	0.687
	6	34	0.96	0.43	0.417483	0.2848	0.517
	6	35	1	0.64	0.647062	0.4606	0.768
	6	36	0.99	0.52	0.503149	0.3483	0.606
	6	37	0.99	0.62	0.623842	0.44	0.762
	6	38	1	0.77	0.737252	0.5376	0.776
	7	39	1	0.53	0.54403	0.3782	0.692
	7	40	0.98	0.59	0.602987	0.42	0.695
	7	41	0.98	0.73	0.720757	0.5217	0.776
	7	42	1	0.79	0.787691	0.5835	0.861
	7	43	1	0.71	0.701018	0.5018	0.757
	8	44	0.99	0.71	0.675339	0.4883	0.687
	8	45	0.46	0.3	0.300167	0.2013	0.403
	8	46	0.98	0.49	0.453034	0.3122	0.531
	8	47	1	0.68	0.637563	0.4532	0.695
	8	48	0.99	0.63	0.603046	0.4227	0.597
	8	49	0.9	0.55	0.565275	0.3945	0.768
	8	50	0.93	0.62	0.591872	0.4222	0.659
	8	51	0.92	0.56	0.509604	0.3479	0.534
	8	52	1	0.75	0.673752	0.4874	0.686
	8	53	1	0.6	0.558378	0.3885	0.587
	8	54	1	0.74	0.660812	0.477	0.672

## Sheet: DNAAF4
Gene	file number	focus number	Costes P-Value	Pearson R value	Spearman's Rank Correlation	Kendall's Tau Rank Correlation	Manders Tm2
DNNAF4	1	1	1	0.76	0.745926	0.5503	0.855
DNNAF4		2	0.99	0.78	0.796696	0.5941	0.901
DNNAF4		3	0.97	0.75	0.764498	0.5721	0.919
DNNAF4		4	0.99	0.81	0.788676	0.5887	0.837
DNNAF4		5	0.99	0.81	0.832192	0.6355	0.557
DNNAF4		6	1	0.72	0.722498	0.5243	0.829
DNNAF4		7	0.98	0.82	0.842827	0.6469	0.127
DNNAF4	2	8	1	0.8	0.732053	1	0.819
DNNAF4		9	0.99	0.62	0.640815	0.461	0.805
DNNAF4		10	0.93	0.57	0.617529	0.4421	0.817
DNNAF4		11	0.96	0.71	0.753038	0.56	0.92
DNNAF4		12	1	0.79	0.742181	0.5573	0.852
DNNAF4		13	1	0.77	0.696691	0.5184	0.845
DNNAF4	3	14	0.99	0.71	0.639325	0.99	0.743
DNNAF4		15	1	0.62	0.631885	0.4519	0.758
DNNAF4		16	0.93	0.48	0.468839	0.3302	0.642
DNNAF4		17	0.97	0.51	0.480743	0.3352	0.594
DNNAF4		18	0.98	0.67	0.70965	0.5131	0.844
DNNAF4		19	1	0.62	0.602221	0.4298	0.717
DNNAF4	4	20	0.99	0.64	0.659521	0.4733	0.776
DNNAF4		21	0.57	0.52	0.563515	0.3885	0.725
DNNAF4		22	0.95	0.59	0.58909	0.415	0.685
DNNAF4		23	1	0.66	0.615462	0.4381	0.732
DNNAF4	5	24	0.99	0.71	0.742663	0.5504	0.896
DNNAF4		25	1	0.69	0.669507	0.491	0.7
DNNAF4		26	0.96	0.66	0.684786	0.4952	0.787
DNNAF4		27	0.99	0.76	0.763561	0.5722	0.899
DNNAF4	6	28	0.99	0.66	0.574204	0.4102	0.721
DNNAF4		29	0.96	0.52	0.550748	0.3894	0.761
DNNAF4		30	0.98	0.64	0.679421	0.4951	0.894
DNNAF4		31	0.95	0.56	0.606481	0.4289	0.817
DNNAF4		32	1	0.62	0.63582	0.4521	0.781
DNNAF4		33	0.95	0.58	0.574207	0.4043	0.715
DNNAF4		34	0.87	0.46	0.481159	0.3358	0.629
DNNAF4		35	0.9	0.58	0.616765	0.4335	0.833
DNNAF4		36	0.86	0.61	0.662502	0.4708	0.832
DNNAF4		37	1	0.72	0.746717	0.5458	0.874
DNNAF4	7	38	1	0.68	0.786391	0.5922	0.902
DNNAF4		39	0.68	0.74	0.758608	0.5668	0.922
DNNAF4		40	1	0.77	0.794503	0.6045	0.941
DNNAF4		41	0.97	0.67	0.663798	0.4784	0.758
DNNAF4		42	1	0.77	0.76668	0.5789	0.902
DNNAF4		43	0.97	0.49	0.508094	0.3623	0.803
DNNAF4		44	1	0.7	0.735149	0.5382	0.864
DNNAF4		45	0.94	0.49	0.525388	0.3682	0.896
DNNAF4		46	1	0.81	0.830303	0.63	0.918
DNNAF4	8	47	1	0.87	0.776655	0.5937	0.9
DNNAF4		48	0.99	0.8	0.83098	0.6304	0.947
DNNAF4		49	1	0.77	0.80099	0.6	0.929
DNNAF4		50	0.88	0.67	0.687701	0.4936	0.818
DNNAF4		51	0.97	0.7	0.708711	0.5206	0.846
DNNAF4		52	1	0.83	0.847736	0.6522	0.937
DNNAF4		53	1	0.72	0.69013	0.5042	0.829
DNNAF4		54	1	0.84	0.824401	0.6309	0.925
DNNAF4	9	55	1	0.86	0.864953	0.6741	0.943
DNNAF4	10	56	1	0.85	0.849817	0.6547	0.928
			1	0.84	0.6876	0.5171	0.834
			1	0.8	0.666715	0.4962	0.82
			1	0.72	0.742493	0.5471	0.878
			1	0.73	0.754706	0.5606	0.911

## Sheet: heatr2
Gene	cell number	focus number	Costes P-Value	Pearson R value	Spearman's Rank Correlation	Kendall's Tau Rank Correlation	Manders Tm2
HEATR2	1	1	0.99	0.3	0.295383	0.2041	0.459
HEATR2	1	2	0.71	0.27	0.268362	0.1832	0.434
HEATR2	1	3	1	0.5	0.519753	0.358	0.63
HEATR2	1	4	0.99	0.43	0.39872	0.2758	0.474
HEATR2	1	5	1	0.56	0.494092	0.3457	0.602
HEATR2	2	6	1	0.62	0.541736	0.3833	0.648
HEATR2	2	7	0.98	0.42	0.397435	0.2757	0.516
HEATR2	2	8	0.99	0.39	0.363888	0.2521	0.471
HEATR2	2	9	0.99	0.43	0.43672	0.305	0.543
HEATR2	2	10	1	0.46	0.433435	0.3041	0.534
HEATR2	2	11	0.98	0.5	0.530249	0.3719	0.641
HEATR2	3	12	0.98	0.46	0.393191	0.2718	0.541
HEATR2	3	13	0.96	0.51	0.551301	0.3803	0.641
HEATR2	3	14	0.99	0.62	0.605395	0.4288	0.699
HEATR2	3	15	0.99	0.6	0.640854	0.4516	0.745
HEATR2	4	16	0.98	0.43	0.379307	0.262	0.48
HEATR2	4	17	1	0.49	0.478987	0.3322	0.568
HEATR2	4	18	0.99	0.58	0.584974	0.4037	0.657
HEATR2	4	19	1	0.67	0.642206	0.4589	0.674
HEATR2	4	20	0.97	0.59	0.60985	0.4274	0.669
HEATR2	4	21	0.94	0.4	0.41342	0.2854	0.587
HEATR2	4	22	0.99	0.45	0.465602	0.3252	0.651
HEATR2	4	23	0.99	0.4	0.402024	0.2773	0.518
HEATR2	4	24	0.94	0.48	0.497478	0.3423	0.584
HEATR2	5	25	1	0.58	0.541825	0.3804	0.618
HEATR2	5	26	1	0.56	0.580101	0.4106	0.625
HEATR2	5	27	0.95	0.5	0.543704	0.3802	0.743
HEATR2	5	28	0.96	0.63	0.628839	0.4428	0.663
HEATR2	5	29	0.99	0.52	0.466226	0.3247	0.533
HEATR2	5	30	0.99	0.67	0.647054	0.4651	0.708
HEATR2	5	31	1	0.63	0.619961	0.4394	0.684
HEATR2	6	32	1	0.54	0.506869	0.3559	0.667
HEATR2	6	33	0.94	0.44	0.385428	0.2708	0.542
HEATR2	6	34	1	0.64	0.521657	0.3749	0.68
HEATR2	7	35	0.96	0.47	0.50513	0.3457	0.618
HEATR2	7	36	0.86	0.49	0.463058	0.3177	0.612
HEATR2	7	37	0.96	0.58	0.617688	0.4345	0.763
HEATR2	7	38	0.98	0.68	0.641124	0.461	0.745
HEATR2	7	39	1	0.7	0.70266	0.5066	0.825
HEATR2	7	40	0.98	0.47	0.379894	0.2611	0.545
HEATR2	7	41	1	0.7	0.696564	0.5026	0.82
HEATR2	8	42	0.99	0.52	0.529396	0.3683	0.639
HEATR2	8	43	1	0.64	0.61645	0.444	0.738
HEATR2	8	44	0.99	0.58	0.571383	0.4068	0.693
HEATR2	8	45	0.98	0.56	0.510718	0.3629	0.639
HEATR2	8	46	0.97	0.5	0.497774	0.3458	0.635
HEATR2	8	47	1	0.67	0.655164	0.4732	0.768

## Sheet: lrrc6
Gene	cell number	focus number	Costes P-Value	Pearson R value	Spearman's Rank Correlation	Kendall's Tau Rank Correlation	Manders Tm2
LRRC6	1	1	1	0.59	0.630122	0.448	0.711
LRRC6	1	2	0.99	0.49	0.450655	0.3157	0.507
LRRC6	1	3	1	0.58	0.62342	0.4438	0.716
LRRC6	1	4	1	0.63	0.649795	0.4689	0.756
LRRC6	1	5	1	0.45	0.434024	0.3031	0.489
LRRC6	1	6	1	0.67	0.668905	0.484	0.696
LRRC6	2	7	0.93	0.48	0.503396	0.3527	0.58
LRRC6	2	8	1	0.64	0.672339	0.4811	0.713
LRRC6	2	9	0.93	0.54	0.545677	0.3795	0.594
LRRC6	2	10	1	0.59	0.61354	0.4345	0.674
LRRC6	2	11	1	0.62	0.620365	0.4417	0.686
LRRC6	2	12	0.97	0.41	0.414169	0.2877	0.485
LRRC6	2	13	0.98	0.35	0.331533	0.2285	0.414
LRRC6	2	14	0.98	0.48	0.501468	0.355	0.646
LRRC6	2	15	0.99	0.39	0.365725	0.2523	0.402
LRRC6	2	16	0.99	0.46	0.465579	0.3231	0.477
LRRC6	2	17	0.78	0.34	0.330395	0.2281	0.398
LRRC6	2	18	1	0.59	0.625035	0.4395	0.675
LRRC6	2	19	0.98	0.44	0.479782	0.3307	0.552
LRRC6	3	20	0.97	0.5	0.498564	0.3496	0.606
LRRC6	3	21	0.83	0.41	0.411389	0.2874	0.481
LRRC6	3	22	0.97	0.49	0.501524	0.348	0.607
LRRC6	3	23	0.9	0.54	0.528506	0.3721	0.567
LRRC6	4	24	1	0.55	0.559879	0.3898	0.681
LRRC6	4	25	1	0.67	0.678084	0.4801	0.732
LRRC6	4	26	0.97	0.55	0.573838	0.406	0.729
LRRC6	4	27	0.89	0.4	0.423869	0.2898	0.531
LRRC6	4	28	0.65	0.41	0.370018	0.2588	0.496
LRRC6	4	29	0.99	0.62	0.654812	0.4674	0.754
LRRC6	4	30	1	0.71	0.694684	0.4987	0.745
LRRC6	5	31	0.97	0.57	0.59858	0.4115	0.664
LRRC6	5	32	0.94	0.5	0.525656	0.3658	0.648
LRRC6	5	33	0.78	0.47	0.480292	0.3316	0.556
LRRC6	5	34	0.63	0.29	0.322257	0.2206	0.491
LRRC6	5	35	0.91	0.65	0.679018	0.4874	0.779
LRRC6	5	36	0.99	0.55	0.566082	0.3928	0.64
LRRC6	6	37	0.96	0.54	0.558543	0.39	0.665
LRRC6	6	38	0.97	0.42	0.443824	0.3043	0.625
LRRC6	6	39	0.65	0.46	0.458769	0.3188	0.581
LRRC6	6	40	0.88	0.38	0.393262	0.2721	0.533
LRRC6	6	41	0.98	0.54	0.537313	0.3777	0.629
LRRC6	6	42	0.92	0.51	0.527738	0.3638	0.626
LRRC6	7	43	0.94	0.54	0.547586	0.3827	0.716
LRRC6	7	44	0.98	0.63	0.649132	0.4545	0.767
LRRC6	7	45	0.92	0.57	0.602548	0.4306	0.487
LRRC6	7	46	0.81	0.36	0.320295	0.2205	0.467
LRRC6	7	47	0.78	0.37	0.381695	0.262	0.528
LRRC6	7	48	1	0.45	0.458429	0.3178	0.534
LRRC6	7	49	0.98	0.49	0.531704	0.369	0.715
LRRC6	7	50	0.84	0.42	0.4155	0.2898	0.538
LRRC6	7	51	1	0.25	0.0798591	0.0566	0.222
LRRC6	8	52	0.84	0.51	0.519151	0.3591	0.667
LRRC6	8	53	0.99	0.48	0.498346	0.3436	0.692
LRRC6	8	54	0.89	0.45	0.468214	0.3235	0.64
LRRC6	8	55	0.98	0.66	0.695587	0.4974	0.842
LRRC6	8	56	0.98	0.52	0.538669	0.3766	0.714
LRRC6	9	57	0.94	0.43	0.443863	0.306	0.619
LRRC6	9	58	0.93	0.34	0.35892	0.2445	0.535
LRRC6	9	59	1	0.64	0.647039	0.4589	0.734
LRRC6	10	60	0.87	0.41	0.429173	0.2945	0.579
LRRC6	10	61	0.97	0.52	0.524973	0.3642	0.69
LRRC6	10	62	0.99	0.6	0.623662	0.4401	0.78
LRRC6	10	63	1	0.55	0.486962	0.3402	0.585
LRRC6	10	64	1	0.56	0.563243	0.395	0.663
LRRC6	10	65	0.8	0.44	0.460966	0.3162	0.598
LRRC6	11	66	1	0.42	0.325657	0.2271	0.444
LRRC6	11	67	0.99	0.45	0.389468	0.2737	0.485
LRRC6	11	68	0.99	0.38	0.360304	0.251	0.489
LRRC6	11	69	0.96	0.35	0.328081	0.2278	0.44

## Sheet: pih1d3
Gene	cell number	focus number	Costes P-Value	Pearson R value	Spearman's Rank Correlation	Kendall's Tau Rank Correlation	Manders Tm2
pih1d3	1	1	0.96	0.39	0.360623	0.2497	0.435
	1	2	0.91	0.46	0.488287	0.3392	0.64
	1	3	0.95	0.62	0.574795	0.4089	0.67
	1	4	0.98	0.52	0.505377	0.3557	0.674
	1	5	1	0.57	0.491263	0.3464	0.605
	1	6	1	0.77	0.683383	0.504	0.756
	1	7	1	0.51	0.407173	0.285	0.466
	1	8	0.89	0.58	0.502505	0.3473	0.561
	2	9	0.99	0.52	0.522191	0.3647	0.646
	2	10	0.99	0.53	0.547029	0.3867	0.685
	2	11	0.99	0.52	0.502768	0.3507	0.544
	2	12	0.97	0.44	0.458018	0.3152	0.601
	2	13	0.96	0.28	0.256278	0.1781	0.341
	2	14	0.91	0.33	0.354492	0.2473	0.483
	2	15	1	0.48	0.423954	0.2972	0.492
	3	16	1	0.56	0.485841	0.3378	0.517
	3	17	0.98	0.38	0.361501	0.2478	0.47
	3	18	1	0.45	0.388688	0.2657	0.476
	3	19	0.91	0.48	0.480762	0.3291	0.561
	4	20	1	0.38	0.335936	0.2322	0.433
	4	21	1	0.42	0.373569	0.2589	0.469
	4	22	1	0.48	0.507506	0.3503	0.623
	4	23	1	0.53	0.450747	0.3148	0.526
	4	24	0.94	0.45	0.475257	0.326	0.591
	4	25	0.96	0.5	0.476091	0.3341	0.561
	5	26	1	0.45	0.42144	0.2936	0.522
	5	27	1	0.5	0.489343	0.3429	0.591
	5	28	0.98	0.41	0.400605	0.2766	0.5
	5	29	0.99	0.4	0.329541	0.2328	0.426
	5	30	1	0.37	0.33465	0.2367	0.44
	5	31	1	0.49	0.380202	0.2713	0.484
	5	32	0.9	0.44	0.45947	0.3216	0.552

## Sheet: ZMYND10
Gene	file number	focus number	Costes P-Value	Pearson R value	Spearman's Rank Correlation	Kendall's Tau Rank Correlation	Manders Tm2
ZMYND10	11	1	0.59	0.61	0.616848	0.4338	0.796
ZMYND10		2	0.99	0.76	0.780045	0.5797	0.895
ZMYND10		3	1	0.82	0.829294	0.6329	0.958
ZMYND10		4	1	0.84	0.838993	0.6361	0.909
ZMYND10		5	0.92	0.78	0.752965	0.5563	0.436
ZMYND10	12	6	0.99	0.79	0.81246	0.611	0.451
ZMYND10		7	0.98	0.79	0.810039	0.6208	0.97
ZMYND10		8	0.98	0.77	0.761804	0.5606	0.467
ZMYND10		9	0.95	0.72	0.686273	0.5031	0.774
ZMYND10		10	0.63	0.59	0.589466	0.4216	0.875
ZMYND10	13	11	0.99	0.86	0.871092	0.6789	0.468
ZMYND10		12	1	0.83	0.832108	0.6381	0.962
ZMYND10		13	0.99	0.76	0.737209	0.5422	0.835
ZMYND10		14	0.94	0.8	0.798494	0.5973	0.869
ZMYND10		15	0.98	0.74	0.747892	0.5563	0.945
ZMYND10	14	16	1	0.87	0.865545	0.6654	0.933
ZMYND10		17	0.8	0.68	0.704162	0.5151	0.47
ZMYND10		18	0.95	0.54	0.458049	0.3199	0.57
ZMYND10		19	0.99	0.73	0.694267	0.5088	0.82
ZMYND10		20	0.98	0.69	0.69759	0.5043	0.929
ZMYND10	21	21	1	0.72	0.731026	0.5408	0.887
ZMYND10		22	0.99	0.75	0.659997	0.785	0.4806
ZMYND10		23	0.83	0.66	0.6843	0.5013	0.064
ZMYND10		24	0.98	0.73	0.749436	0.555	0.953
ZMYND10		25	1	0.85	0.847256	0.6463	0.921
ZMYND10		26	1	0.72	0.735352	0.5385	0.874
ZMYND10		27	1	0.77	0.782435	0.5842	0.939
ZMYND10	22	28	0.91	0.64	0.641221	0.4529	0.767
ZMYND10		29	0.96	0.4	0.443175	0.3029	0.606
ZMYND10		30	0.88	0.53	0.557064	0.3837	0.7
ZMYND10		31	0.88	0.41	0.384254	0.2648	0.51
ZMYND10	23	32	0.99	0.77	0.782936	0.5798	0.88
ZMYND10		33	1	0.75	0.770569	0.5667	0.938
ZMYND10		34	0.99	0.79	0.804925	0.6006	0.936
ZMYND10		35	0.99	0.77	0.781697	0.5773	0.89
ZMYND10		36	1	0.78	0.782931	0.5835	0.877
ZMYND10		37	0.96	0.64	0.659159	0.4723	0.861
ZMYND10	24	38	1	0.85	0.837381	0.6371	0.922
ZMYND10		39	0.99	0.73	0.948	0.5489	0.948
ZMYND10		40	0.98	0.71	0.686753	0.4955	0.751
ZMYND10		41	0.98	0.59	0.61014	0.4305	0.848
ZMYND10		42	0.99	0.72	0.741701	0.5445	0.905
ZMYND10		43	1	0.72	0.733509	0.5362	0.931
ZMYND10		44	0.72	0.78	0.793845	0.5927	0.953
ZMYND10		45	1	0.78	0.798967	0.5919	0.915
ZMYND10	31	46	1	0.82	0.830028	0.6286	0.955
ZMYND10		47	1	0.82	0.826244	0.626	0.903
ZMYND10		48	1	0.78	0.790651	0.5904	0.892
ZMYND10		49	1	0.75	0.66683	0.4824	0.759
ZMYND10		50	0.95	0.7	0.692158	0.5051	0.802
ZMYND10	32	51	0.91	0.71	0.730818	0.5394	0.155
ZMYND10		52	1	0.78	0.767736	0.569	0.854
ZMYND10		53	0.94	0.7	0.71123	0.5193	0.874
ZMYND10		54	0.95	0.74	0.751107	0.5543	0.889
ZMYND10		55	0.96	0.49	0.48467	0.3414	0.849
ZMYND10		56	0.99	0.59	0.604117	0.4251	0.659
ZMYND10		57	0.98	0.61	0.624971	0.4464	0.769
ZMYND10		58	0.88	0.68	0.683753	0.4844	0.774
ZMYND10	34	59	1	0.8	0.827428	0.623	0.214
ZMYND10		60	0.91	0.7	0.723259	0.5292	0.95
ZMYND10		61	0.93	0.74	0.868	0.5654	0.868
ZMYND10		62	1	0.75	0.771105	0.5673	0.876
ZMYND10		63	0.92	0.63	0.642492	0.4646	0.887
ZMYND10		64
ZMYND10		65
ZMYND10
ZMYND10
ZMYND10
ZMYND10
ZMYND10
ZMYND10
ZMYND10
ZMYND10
ZMYND10
ZMYND10
ZMYND10
ZMYND10
ZMYND10
ZMYND10
ZMYND10
ZMYND10
ZMYND10
ZMYND10
ZMYND10
ZMYND10
ZMYND10
ZMYND10
ZMYND10

## Sheet: HSP90ab1
Gene	file number	focus number	Costes P-Value	Pearson R value	Spearman's Rank Correlation	Kendall's Tau Rank Correlation	Manders Tm2
HSP90ab1	18	1	0.99	0.34	0.276668	0.195	0.428
HSP90ab1		2	0.91	0.47	0.339791	0.2344	0.442
HSP90ab1		3	0.99	0.53	0.48298	0.3407	0.622
HSP90ab1		4	0.98	0.39	0.316697	0.222	0.416
HSP90ab1		5	1	0.67	0.490723	0.3532	0.599
HSP90ab1	17	6	0.95	0.32	0.343727	0.2412	0.491
HSP90ab1		7	0.97	0.48	0.45097	0.3164	0.547
HSP90ab1		8	0.96	0.47	0.393264	0.2747	0.515
HSP90ab1		9	1	0.65	0.464496	0.3327	0.606
HSP90ab1	16	10	1	0.68	0.560518	0.4034	0.663
HSP90ab1		11	0.97	0.54	0.504013	0.358	0.613
HSP90ab1		12	0.81	0.41	0.330771	0.2366	0.465
HSP90ab1		13	0.97	0.68	0.66349	0.4782	0.732
HSP90ab1		14	0.97	0.56	0.48907	0.3441	0.576
HSP90ab1	15	15	0.82	0.36	0.323937	0.2286	0.39
HSP90ab1		16	0.96	0.32	0.288224	0.202	0.44
HSP90ab1		17	1	0.76	0.753862	0.5611	0.824
HSP90ab1		18	1	0.57	0.548238	0.388	0.614
HSP90ab1		19	0.99	0.67	0.532049	0.381	0.577
HSP90ab1		20	0.96	0.52	0.518238	0.3639	0.623
HSP90ab1		21	0.88	0.51	0.424373	0.3017	0.484
HSP90ab1		22	0.96	0.63	0.606808	0.4318	0.654
HSP90ab1		23	0.99	0.49	0.461781	0.3246	0.608
HSP90ab1		24	0.97	0.6	0.558475	0.3955	0.617
HSP90ab1	14	25	0.99	0.55	0.509344	0.99	0.61
HSP90ab1		26	1	0.63	0.594899	0.4281	0.686
HSP90ab1		27	0.78	0.5	0.536655	0.3745	0.721
HSP90ab1		28	0.5	0.51	0.520526	0.3646	0.619
HSP90ab1		29	0.99	0.58	0.55948	0.3918	0.673
HSP90ab1		30	0.99	0.54	0.509443	0.3544	0.597
HSP90ab1		31	1	0.57	0.549848	0.3931	0.687
HSP90ab1		32	1	0.71	0.646026	0.4703	0.742
HSP90ab1		33	0.89	0.54	0.499044	0.3546	0.609
HSP90ab1		34	0.87	0.57	0.521632	0.3721	0.628
HSP90ab1		35	0.91	0.49	0.374296	0.263	0.471
HSP90ab1		36	0.93	0.54	0.365479	0.2549	0.512
HSP90ab1		37	0.99	0.46	0.481683	0.334	0.604
HSP90ab1		38	1	0.78	0.734191	0.5425	0.217
HSP90ab1	13	39	1	0.75	0.67701	0.4952	0.794
HSP90ab1		40	1	0.51	0.450011	0.3207	0.6
HSP90ab1		41	0.69	0.45	0.443991	0.3083	0.582
HSP90ab1		42	0.98	0.57	0.559441	0.4009	0.668
HSP90ab1		43	1	0.68	0.672417	0.4863	0.759
HSP90ab1		44	1	0.59	0.53109	0.3815	0.661
HSP90ab1		45	1	0.51	0.49982	0.3538	0.637
HSP90ab1	12	46	0.89	0.49	0.382049	0.2668	0.531
HSP90ab1		47	1	0.41	0.397248	0.2773	0.507
HSP90ab1		48	1	0.65	0.656888	0.4653	0.738
HSP90ab1		49	1	0.62	0.548934	0.3894	0.623
HSP90ab1		50	1	0.53	0.476597	0.3349	0.624
HSP90ab1		51	0.98	0.43	0.443895	0.306	0.613
HSP90ab1		52	0.88	0.41	0.390121	0.2729	0.536
HSP90ab1		53	0.99	0.48	0.469024	0.328	0.609
HSP90ab1	11	54	0.97	0.71	0.7291	0.97	0.784
HSP90ab1		55	0.99	0.56	0.570706	0.4047	0.702
HSP90ab1		56	1	0.75	0.696838	0.5046	0.78
HSP90ab1		57	0.98	0.71	0.690578	0.5005	0.742
HSP90ab1		58	0.85	0.58	0.5857	0.4168	0.656
HSP90ab1		59	0.89	0.59	0.601732	0.4315	0.724
HSP90ab1		60	1	0.77	0.728438	0.5346	0.443
HSP90ab1		61	1	0.75	0.780559	0.5752	0.344
HSP90ab1		62	0.99	0.73	0.600896	0.4276	0.667
HSP90ab1		63	0.98	0.71	0.797154	0.5971	0.902
HSP90ab1	10	64	1	0.69	0.63424	0.4569	0.752
HSP90ab1		65	0.99	0.66	0.677849	0.4871	0.47
HSP90ab1		66	0.89	0.45	0.437074	0.3052	0.609
HSP90ab1		67	1	0.67	0.644366	0.46	0.71
HSP90ab1		68	1	0.66	0.63623	0.4557	0.724
HSP90ab1	9	69	0.99	0.86	0.849985	0.6581	0.184
HSP90ab1		70	0.99	0.72	0.727002	0.5294	0.805
HSP90ab1		71	1	0.82	0.742397	0.5543	0.798
HSP90ab1		72	0.99	0.64	0.646776	0.4657	0.725
HSP90ab1		73	1	0.6	0.591588	0.4237	0.69
HSP90ab1		74	1	0.77	0.738104	0.5426	0.821
HSP90ab1		75	0.99	0.77	0.765387	0.5658	0.456
HSP90ab1	7	76	1	0.55	0.571869	0.4005	0.681
HSP90ab1		77	1	0.61	0.731	0.4252	0.731
HSP90ab1		78	0.85	0.4	0.461144	0.3138	0.579
HSP90ab1		79	0.83	0.42	0.457833	0.3124	0.569
HSP90ab1		80	1	0.45	0.397474	0.2765	0.499
HSP90ab1	6	81	1	0.78	0.703712	0.5143	0.79
HSP90ab1		82	1	0.55	0.558474	0.3954	0.645
HSP90ab1		83	0.99	0.44	0.270699	0.1903	0.418
HSP90ab1		84	0.9	0.48	0.398236	0.2778	0.509
HSP90ab1		85	0.95	0.55	0.543747	0.3763	0.658
HSP90ab1	5	86	1	0.53	0.804	0.5235	0.804
HSP90ab1		87	1	0.66	0.671133	0.4743	0.4743
HSP90ab1		88	0.98	0.53	0.469238	0.3267	0.596
HSP90ab1		89	0.99	0.54	0.531057	0.3747	0.623
HSP90ab1		90	1	0.5	0.532645	0.3702	0.663
HSP90ab1	4	91	0.99	0.63	0.65069	0.4664	0.803
HSP90ab1		92	0.6	0.33	0.290371	0.1999	0.42
HSP90ab1		93	0.96	0.37	0.376099	0.2612	0.464
HSP90ab1		94	0.97	0.55	0.554638	0.393	0.693
HSP90ab1		95	0.99	0.5	0.528673	0.3699	0.656
HSP90ab1	3	96	1	0.59	0.604855	0.4245	0.733
HSP90ab1		97	0.96	0.55	0.499149	0.3518	0.562
HSP90ab1		98	0.97	0.56	0.451072	0.3138	0.539
HSP90ab1		99	1	0.59	0.59347	0.4183	0.718
HSP90ab1		100	0.97	0.53	0.551524	0.3843	0.651
HSP90ab1		101
HSP90ab1		102

## Sheet: HSPA8
Gene	file number	focus number	Costes P-Value	Pearson R value	Spearman's Rank Correlation	Kendall's Tau Rank Correlation	Manders Tm2
HSPA8	1	1	1	0.42	0.404714	0.2799	0.513
HSPA8		2	0.96	0.42	0.388087	0.2706	0.486
HSPA8		3	0.99	0.34	0.343807	0.2429	0.407
HSPA8		4	1	0.44	0.458477	0.3183	0.591
HSPA8		5	1	0.54	0.55066	0.3869	0.683
HSPA8	2	6	0.54	0.6	0.604275	0.4326	0.699
HSPA8		7	0.88	0.35	0.354652	0.2423	0.513
HSPA8		8	1	0.59	0.602602	0.4267	0.715
HSPA8	3	9	0.99	0.39	0.388871	0.99	0.482
HSPA8		10	1	0.46	0.458487	0.3229	0.607
HSPA8		11	0.99	0.41	0.412033	0.2899	0.559
HSPA8		12	1	0.56	0.534469	0.381	0.637
HSPA8		13	1	0.56	0.610457	0.431	0.768
HSPA8	4	14	1	0.64	0.601286	0.4279	0.703
HSPA8		15	1	0.4	0.394736	0.2716	0.506
HSPA8		16	1	0.5	0.45498	0.323	0.574
HSPA8	5	17	1	0.63	0.577208	0.4089	0.682
HSPA8		18	0.98	0.54	0.515509	0.3601	0.3601
HSPA8		19	0.78	0.37	0.41113	0.2801	0.535
HSPA8		20	0.98	0.46	0.359323	0.253	0.444
HSPA8		21	0.97	0.47	0.487984	0.3407	0.569
HSPA8		22	0.84	0.34	0.363467	0.2524	0.499
HSPA8		23	0.98	0.42	0.423445	0.2942	0.575
HSPA8		24	0.94	0.44	0.374591	0.2611	0.485
HSPA8		25	1	0.64	0.631811	0.4528	0.743
HSPA8	6	26	1	0.48	0.514814	0.359	0.653
HSPA8		27	0.94	0.39	0.355142	0.2473	0.44
HSPA8		28	0.98	0.29	0.252384	0.1755	0.344
HSPA8		29	1	0.47	0.473659	0.3279	0.594
HSPA8	8	30	1	0.54	0.519558	0.3647	0.608
HSPA8		31	0.98	0.45	0.423193	0.2955	0.491
HSPA8		32	0.92	0.37	0.377915	0.2594	0.493
HSPA8	9	33	1	0.54	0.575005	0.4064	0.749
HSPA8		34	0.99	0.44	0.404176	0.2859	0.53
HSPA8		35	0.99	0.59	0.642365	0.4568	0.798
HSPA8		36	0.95	0.29	0.33707	0.2346	0.434
HSPA8	12	37	0.97	0.45	0.461788	0.3259	0.624
HSPA8		38	0.62	0.22	0.28343	0.1959	0.467
HSPA8		39	0.69	0.26	0.316621	0.2184	0.474
HSPA8		40	0.85	0.29	0.272885	0.189	0.458
HSPA8		41	0.96	0.39	0.443746	0.3092	0.59
HSPA8		42	0.98	0.44	0.45481	0.3169	0.591
HSPA8	13	43	1	0.55	0.589935	0.416	0.753
HSPA8		44	0.99	0.44	0.691	0.3214	0.691
HSPA8		45	0.96	0.36	0.360827	0.2462	0.521
HSPA8		46	1	0.36	0.377067	0.2614	0.511
HSPA8		47	1	0.5	0.546891	0.3813	0.726
HSPA8	14	48	1	0.46	0.476891	0.3345	0.642
HSPA8		49	1	0.54	0.539317	0.3826	0.641
HSPA8		50	1	0.53	0.574856	0.4064	0.727
HSPA8	15	51	1	0.5	0.495401	0.3487	0.6
HSPA8	16	52	1	0.45	0.491262	0.3422	0.665
HSPA8		53	0.99	0.26	0.255408	0.1754	0.377

## Sheet: TTC2
Gene	file number	focus number	Costes P-Value	Pearson R value	Spearman's Rank Correlation	Kendall's Tau Rank Correlation	Manders Tm2
TTC2	2	1	1	0.74	0.697609	0.5086	0.5086
TTC2		2	1	0.71	0.618558	1	0.678
TTC2		3	0.92	0.56	0.548186	0.3886	0.63
TTC2		4	1	0.46	0.442643	0.307	0.528
TTC2		5	1	0.62	0.572389	0.3998	0.63
TTC2	3	6	1	0.63	0.625459	0.4392	0.707
TTC2		7	0.98	0.57	0.520005	0.3672	0.565
TTC2		8	0.94	0.68	0.793365	0.5898	0.326
TTC2	4	9	0.98	0.67	0.69496	0.5036	0.834
TTC2		10	0.99	0.65	0.677997	0.4941	0.714
TTC2		11	0.12	0.19	0.20582	0.1402	0.316
TTC2		12	0.93	0.37	0.320562	0.2207	0.392
TTC2		13	1	0.73	0.626326	0.4485	0.686
TTC2		14	1	0.61	0.604815	0.4294	0.739
TTC2	5	15	1	0.65	0.665187	0.4772	0.756
TTC2		16	0.98	0.51	0.551387	0.3853	0.657
TTC2		17	0.96	0.64	0.693364	0.4981	0.83
TTC2		18	1	0.6	0.674168	0.4779	0.356
TTC2		19	0.98	0.55	0.574546	0.4049	0.79
TTC2		20	0.98	0.78	0.774872	0.5905	0.299
TTC2	6	21	1	0.832875	0.832875	0.6379	0.259
TTC2		22	0.94	0.64	0.731951	0.94	0.315
TTC2		23	0.99	0.69	0.611087	0.4323	0.646
TTC2		24	0.98	0.72	0.672235	0.4875	0.727
TTC2		25	1	0.7	0.530822	0.3803	0.613
TTC2	7	26	1	0.59	0.611613	0.4315	0.738
TTC2		27	0.99	0.68	0.672669	0.4817	0.713
TTC2		28	0.99	0.67	0.700395	0.5032	0.818
TTC2		29	1	0.7	0.678406	0.4938	0.772
TTC2		30	0.99	0.76	0.766486	0.569	0.219
TTC2	8	31	0.92	0.66	0.678722	0.4884	0.84
TTC2		32	0.66	0.7	0.680403	0.4927	0.739
TTC2		33	1	0.77	0.792472	0.5978	0.927
TTC2		34	1	0.81	0.745783	0.5537	0.806
TTC2		35	1	0.86	0.81232	0.6225	0.304
TTC2	9	36	0.98	0.62	0.644825	0.4519	0.735
TTC2		37	0.99	0.46	0.473159	0.3279	0.636
TTC2		38	1	0.62	0.582694	0.4126	0.648
TTC2		39	1	0.65	0.614231	0.4373	0.679
TTC2		40	1	0.66	0.663268	0.4772	0.825
TTC2		41	1	0.79	0.80836	0.6039	0.873
TTC2	10	42	1	0.71	0.743242	0.5476	0.899
TTC2		43	0.92	0.6	0.622275	0.4435	0.81
TTC2		44	0.89	0.34	0.360878	0.2502	0.491
TTC2		45	0.99	0.61	0.655388	0.4716	0.89
TTC2	11	46	1	0.66	0.592345	0.4253	0.695
TTC2		47	0.95	0.36	0.324743	0.2228	0.421
TTC2	12	48	0.98	0.46	0.484875	0.3397	0.634
		49	0.94	0.78	0.737841	0.5599	0.304
		50	0.97	0.8	0.722898	0.5318	0.849
		51	1	0.66	0.639938	0.4573	0.729
	13	52	1	0.53	0.570899	0.4054	0.755
		53	1	0.53	0.476362	0.3384	0.569
		54
		55
		56
		57
		58
		59
		60
		61
		62
		63
		64
		65
		66
		67
		68
		69
		70
		71

## Sheet: G3BP1
Gene	file number	focus number	Costes P-Value	Pearson R value	Spearman's Rank Correlation	Kendall's Tau Rank Correlation	Manders Tm2
G3BP1	1	1	0.93	0.42	0.411646	0.2826	0.53
G3BP1		2	0.91	0.65	0.68447	0.4962	0.792
G3BP1		3	0.92	0.37	0.443337	0.3066	0.624
G3BP1		4	0.96	0.5	0.520523	0.3611	0.808
G3BP1	2	5	0.93	0.52	0.545632	0.93	0.705
G3BP1		6	1	0.48	0.449859	0.3136	0.525
G3BP1		7	0.97	0.45	0.458692	0.3182	0.622
G3BP1		8	0.99	0.64	0.630989	0.4435	0.69
G3BP1		9	0.86	0.51	0.55679	0.3835	0.814
G3BP1	3	10	1	0.81	0.821176	0.617	0.876
G3BP1		11	0.99	0.66	0.683048	0.487	0.786
G3BP1		12	0.99	0.46	0.484935	0.3381	0.644
G3BP1		13	1	0.64	0.571152	0.4056	0.632
G3BP1		14	0.92	0.65	0.61646	0.4334	0.688
G3BP1		15	1	0.65	0.578595	0.41	0.65
G3BP1		16	1	0.66	0.656521	0.4707	0.683
G3BP1	4	17	0.99	0.7	0.708756	0.5104	0.753
G3BP1		18	0.97	0.41	0.397649	0.2737	0.489
G3BP1		19	1	0.76	0.766145	0.5678	0.873
G3BP1		20	0.99	0.56	0.585859	0.4151	0.787
G3BP1	5	21	0.93	0.54	0.539663	0.3767	0.637
G3BP1		22	1	0.68	0.654674	0.4695	0.723
G3BP1		23	0.94	0.39	0.418228	0.2876	0.522
G3BP1		24	0.99	0.56	0.576255	0.4037	0.681
G3BP1		25	0.93	0.42	0.466246	0.3218	0.63
G3BP1		26	1	0.69	0.728745	0.5272	0.867
G3BP1		27	1	0.69	0.671289	0.4803	0.733
G3BP1	6	28	0.98	0.5	0.540738	0.3731	0.768
G3BP1		29	0.98	0.6	0.635284	0.4439	0.758
G3BP1		30	1	0.51	0.467195	0.3272	0.599
G3BP1		31	0.99	0.48	0.41321	0.2877	0.508
G3BP1		32	1	0.71	0.670735	0.478	0.743
G3BP1		33	0.99	0.69	0.697287	0.503	0.789
G3BP1		34	0.97	0.52	0.508297	0.3543	0.584
G3BP1		35	0.99	0.52	0.543207	0.3786	0.663
G3BP1	7	36	1	0.49	0.741	0.4675	0.741
G3BP1		37	0.64	0.31	0.329089	0.224	0.377
G3BP1		38	0.89	0.4	0.436814	0.3014	0.585
G3BP1		39	1	0.64	0.641364	0.4515	0.688
G3BP1	8	40	0.99	0.64	0.591752	0.4197	0.654
G3BP1		41	0.96	0.53	0.55635	0.3829	0.66
G3BP1		42	0.96	0.65	0.677591	0.4837	0.406
G3BP1		43	0.66	0.37	0.399196	0.2724	0.51
G3BP1	9	44	0.99	0.53	0.528231	0.3662	0.598
G3BP1		45	1	0.62	0.665687	0.469	0.758
G3BP1		46	0.98	0.37	0.386929	0.2664	0.494
G3BP1		47	0.81	0.39	0.38959	0.2679	0.523
G3BP1		48	0.8	0.24	0.229707	0.1574	0.314
G3BP1		49	1	0.66	0.668413	0.4758	0.724
G3BP1	10	50	0.98	0.63	0.661516	0.466	0.778
G3BP1		51	0.99	0.53	0.505457	0.3531	0.578
		52	0.97	0.57	0.541497	0.3794	0.58
		53	0.98	0.6	0.567855	0.3925	0.566
		54	1	0.72	0.736352	0.5352	0.806

[truncated: 12 more sheets: G3BP1 (GFP), Fus, Golgi, DNALI1, DNAI1, DNAI2, Tia1, STIP1, EEA1, Ruvbl1, Ruvbl2, SPAG1]
