# Supplementary material for: A liquid-like organelle at the root of motile ciliopathy
Source: eLife. 2018 Dec 18;7:e38497. doi: 10.7554/eLife.38497 (PMC6349401; doi:10.7554/eLife.38497)
Supplement: Figure 3—source data 1. [file elife-38497-fig3-data1.xlsx]

## Sheet: multicilin control
File	Cell#	multiciliated cells ?	DyanAPs #		File	Cell#	multiciliated cells ?	DyanAPs #
control 1-1	1	Yes	19			1	No	0
	2	Yes	18			2		0
	3	Yes	13			3		0
	4	Yes	10			4		0
Control 2-2	1	Yes	9			5		0
	2	Yes	15			6		0
	3	Yes	17			7		0
	4	Yes	13			8		0
		Yes				9		0
		Yes				10		0
						11		0
						12		0
						13		0
					control 2-2	1		0
						2		0
						3		0
						4		0
						5		0
			14.25			6		0
						7		0
						8		0
						9		0
						10		0
						11		0
						12		0

## Sheet: multicilin-HR
File	Cell#	multiciliated cells ?	DyanAPs #		File	Cell#	multiciliated cells ?	DyanAPs #
multicilin with DEX 1-1	1	Yes	4		multicilin with DEX1-1	3	No	13
	2	Yes	14			4	NO	33
multicilin with DEX 2-2	1	Yes	31			5	NO	15
	2	Yes	35		multicilin with DEX 2-2	3	NO	20
		Yes	43			4	NO	25
			22			5	NO	20
multicilin with DEX 4-4			2				NO	13
			13				NO	7
			22				NO	12
			17				NO	4
			3				NO
			9				NO
			10				NO
			7				NO
							NO
							NO
							NO
							NO
			16.5714					16.2

## Sheet: FoxJ1 control
File	Cell#	multiciliated cells ?	DyanAPs #		File	Cell#	multiciliated cells ?	DyanAPs #
Control1	1	Yes	13		Control1	8	NO	0
	2	Yes	17			9	NO	0
	3	Yes	16			10	NO	0
	4	Yes	21			11	NO	0
	5	Yes	12			12	NO	0
control2	1	Yes	15			13	NO	0
	2	Yes	14			14	NO	0
	3	Yes	13			15	NO	0
	4	Yes	12			16	NO	0
	5	Yes	10			17	NO	0
	6	Yes	10			18	NO	0
	7	Yes	16			19	NO	0
control3	1	Yes	21			20	NO	0
	2	Yes	13			21	NO	0
	3	Yes	14			22	NO	0
	4	Yes	15			23	NO	0
	5	Yes	14			24	NO	0
	6	Yes	14			25	NO	0
	7	Yes	21			26	NO	0
	8	Yes	18			27	NO	0
	9	Yes	15		Control2	8	NO	0
						9	NO	0
						10	NO	0
			14.9524			11	NO	0
						12	NO	0
						13	NO	0
						14	NO	0
						15	NO	0
						16	NO	0
						17	NO	0
						18	NO	0
						19	NO	0
						20	NO	0
						21	NO	0
						22	NO	0
						23	NO	0
						24	NO	0
						25	NO	0
						26	NO	0
						27	NO	0
						28	NO	0
						29	NO	0
						30	NO	0
						31	NO	0
						32	NO	0
						33	NO	0
						34	NO	0
						35	NO	0
					contorl3	1	NO	0
						2	NO	0
						3	NO	0
						4	NO	0
						5	NO	0
						6	NO	0
						7	NO	0
						8	NO	0
						9	NO	0
						10	NO	0
						11	NO	0
						12	NO	0
						13	NO	0
						14	NO	0
						15	NO	0
						16	NO	0
						17	NO	0
						18	NO	0
						19	NO	0
						20	NO	0
						21	NO	0
						22	NO	0
						23	NO	0
						24	NO	0
						25	NO	0
						26	NO	0
						27	NO	0
						28	NO	0
						29	NO	0
						30	NO	0
						31	NO	0
						32	NO	0
						33	NO	0
						34	NO	0
						35	NO	0
						36	NO	0
						37	NO	0
						38	NO	0
						39	NO	0
						40	NO	0
						41	NO	0
						42	NO	0
						43	NO	0
						44	NO	0
						45	NO	0
						46	NO	0
						47	NO	0
						48	NO	0
						49	NO	0
						50	NO	0
						51	NO	0
						52	NO	0
						53	NO	0
						54	NO	0
						55	NO	0
						56	NO	0
						57	NO	0

## Sheet: FoxJ1 exp
File	Cell#	multiciliated cells ?	DyanAPs #		File	Cell#	multiciliated cells ?	DyanAPs #
FoxJ1 1	1	Yes	15		FoxJ1 1	11	NO	14
	2	Yes	11			12	NO	6
	3	Yes	16			13	NO	14
	4	Yes	6			14	NO	3
	5	Yes	15			15	NO	7
	6	Yes	13			16	NO	9
FoxJ1 3	1	Yes	9			17	NO	8
FoxJ1 4	1	Yes	12			18	NO	5
	2	Yes	12			19	NO	3
	3	Yes	14			20	NO	2
	4	Yes	16			21	NO	1
	5	Yes	16			22	NO	5
	6	Yes	8		FoxJ1 2	1	NO	20
	7	Yes	9			2	NO	17
FoxJ1 5	1	Yes	13			3	NO	17
	2	Yes	8			4	NO	12
						5	NO	5
						6	NO	7
			12.0625			7	NO	9
						8	NO	9
						9	NO	6
						10	NO	6
						11	NO	11
						12	NO	7
						13	NO	11
						14	NO	11
						15	NO	2
						16	NO	11
					foxJ1 3	1	NO	9
						2	NO	5
						3	NO	6
						4	NO	8
						5	NO	5
						6	NO	6
						7	NO	5
						8	NO	3
						9	NO	5
						10	NO	5
						11	NO	1
						12	NO	4
						13	NO	4
						14	NO	6
						15	NO	2
						16	NO	2
						17	NO	5
					FoxJ1 4	1	NO	5
						2	NO	6
						3	NO	7
						4	NO	3
						5	NO	2
						6	NO	6
						7	NO	2
						8	NO	5
						9	NO	4
						10	NO	6
						11	NO	0
						12	NO	4
						13	NO	5
						14	NO	2
					FoxJ1 5	3	NO	1
						4	NO	1
						5	NO	0
						6	NO	2
						7	NO	0
						8	NO	2
						9	NO	3
						10	NO	3
						11	NO	2
						12	NO	1
						13	NO	5
						14	NO	3
						15	NO	2
						16	NO	4
						17	NO	2
						18	NO	3
						19	NO	2
						20	NO	3
						21	NO	6
						22	NO	2
						23	NO	2
						24	NO	4
						25	NO	4
						26	NO	5
						27	NO	6
						28	NO	3
						29	NO	5
						30	NO	8
						31	NO	2
						32	NO	3
						33	NO	5
						34	NO	5
						35	NO	6
						36	NO	3
						37	NO	3
						38	NO	3
						39	NO	5
						40	NO	3
						41	NO	5
						42	NO	2
						43	NO	5
						44	NO	1
						45	NO	3
						46	NO	5
						47	NO	1
						48	NO	2
						49	NO	5
						50	NO	4
						51	NO	3
						52	NO	2
						53	NO	0
						54	NO	5
						55	NO	2
						56	NO	2
						57	NO	1
						58	NO	4
						59	NO	4
						60	NO	5
						61	NO	5
						62	NO	2
						63	NO	0
						64	NO	2
						65	NO	3
								4.68033
