# Supplementary material for: A liquid-like organelle at the root of motile ciliopathy
Source: eLife. 2018 Dec 18;7:e38497. doi: 10.7554/eLife.38497 (PMC6349401; doi:10.7554/eLife.38497)
Supplement: Figure 4—source data 1. [file elife-38497-fig4-data1.xlsx]

## Sheet: Fig5 source data Frap .csv
x	protein	recovery_half_time	mobile_fraction	condition	descriptor
	GFP-Dnaaf2	1.55	77.3	wild-type	Dynein arm assembly
	GFP-Dnaaf2	1.34	72.1	wild-type	Dynein arm assembly
	GFP-Dnaaf2	2.54	74	wild-type	Dynein arm assembly
	GFP-Dnaaf2	1.57	79.8	wild-type	Dynein arm assembly
	GFP-Dnaaf2	1.67	75.8	wild-type	Dynein arm assembly
	GFP-Dnaaf2	1.56	72.7	wild-type	Dynein arm assembly
	GFP-Dnaaf2	1.82	71.7	wild-type	Dynein arm assembly
	GFP-Dnaaf2	1.5	72.4	wild-type	Dynein arm assembly
	GFP-Dnaaf2	0.96	62.5	wild-type	Dynein arm assembly
	GFP-Dnaaf2	2.01	81.7	wild-type	Dynein arm assembly
	GFP-Dnaaf2	1.04	71.1	wild-type	Dynein arm assembly
	GFP-Dnaaf2	1.2	68.2	wild-type	Dynein arm assembly
	GFP-Dnaaf2	1.27	79.5	wild-type	Dynein arm assembly
	GFP-Dnaaf2	1.89	71.3	wild-type	Dynein arm assembly
	GFP-Dnaaf2	0.88	82.1	wild-type	Dynein arm assembly
	GFP-Dnaaf2	1.06	82	wild-type	Dynein arm assembly
	GFP-Dnaaf2	2.07	92.2	wild-type	Dynein arm assembly
	GFP-Dnaaf2	1.36	78.7	wild-type	Dynein arm assembly
	GFP-Dnaaf2	1.72	85	wild-type	Dynein arm assembly
	GFP-Dnaaf2	2.64	83.2	wild-type	Dynein arm assembly
	GFP-Dnaaf2	2.45	87	wild-type	Dynein arm assembly
	GFP-Dnaaf2	1.7	75.7	wild-type	Dynein arm assembly
	GFP-Dnaaf2	1.13	82.7	wild-type	Dynein arm assembly
	GFP-Dnaaf2	1.55	82.5	wild-type	Dynein arm assembly
	GFP-Dnaaf2	0.87	73.2	wild-type	Dynein arm assembly
	GFP-Lrrc6	0.81	62.8	wild-type	Dynein arm assembly
	GFP-Lrrc6	1.59	62.4	wild-type	Dynein arm assembly
	GFP-Lrrc6	1.22	49.7	wild-type	Dynein arm assembly
	GFP-Lrrc6	0.79	57.7	wild-type	Dynein arm assembly
	GFP-Lrrc6	0.66	53.6	wild-type	Dynein arm assembly
	GFP-Lrrc6	0.75	48.7	wild-type	Dynein arm assembly
	GFP-Lrrc6	0.73	51.9	wild-type	Dynein arm assembly
	GFP-Lrrc6	1.2	38.5	wild-type	Dynein arm assembly
	GFP-Lrrc6	0.86	59.3	wild-type	Dynein arm assembly
	GFP-Lrrc6	1.4	57	wild-type	Dynein arm assembly
	GFP-Lrrc6	1.18	52.5	wild-type	Dynein arm assembly
	GFP-Lrrc6	0.83	49.3	wild-type	Dynein arm assembly
	GFP-Lrrc6	0.61	49.1	wild-type	Dynein arm assembly
	GFP-Lrrc6	0.65	44.7	wild-type	Dynein arm assembly
	GFP-Lrrc6	0.64	44.1	wild-type	Dynein arm assembly
	GFP-Lrrc6	0.59	47.4	wild-type	Dynein arm assembly
	GFP-Lrrc6	0.6	64.8	wild-type	Dynein arm assembly
	GFP-Lrrc6	1.38	38.5	wild-type	Dynein arm assembly
	GFP-Lrrc6	1.87	88.1	wild-type	Dynein arm assembly
	GFP-Lrrc6	0.84	64	wild-type	Dynein arm assembly
	GFP-Lrrc6	0.71	64.9	wild-type	Dynein arm assembly
	GFP-Lrrc6	1.22	65.9	wild-type	Dynein arm assembly
	GFP-Lrrc6	0.7	62.7	wild-type	Dynein arm assembly
	GFP-Lrrc6	0.66	64.6	wild-type	Dynein arm assembly
	GFP-Lrrc6	1.05	65.7	wild-type	Dynein arm assembly
	GFP-Lrrc6	0.82	60.5	wild-type	Dynein arm assembly
	GFP-Lrrc6	0.77	70.7	wild-type	Dynein arm assembly
	GFP-Lrrc6	1.3	66.1	wild-type	Dynein arm assembly
	GFP-Lrrc6	1.14	70.7	wild-type	Dynein arm assembly
	GFP-Lrrc6	1	57.8	wild-type	Dynein arm assembly
	GFP-Lrrc6	0.71	66.7	wild-type	Dynein arm assembly
	GFP-Lrrc6	0.7	72.7	wild-type	Dynein arm assembly
	GFP-Ruvbl2	3.88	59.2	wild-type	Dynein arm assembly
	GFP-Ruvbl2	2.96	53.3	wild-type	Dynein arm assembly
	GFP-Ruvbl2	3.27	66.3	wild-type	Dynein arm assembly
	GFP-Ruvbl2	2.56	63.6	wild-type	Dynein arm assembly
	GFP-Ruvbl2	3.01	54.5	wild-type	Dynein arm assembly
	GFP-Dnali1	0.79	26	wild-type	Dynein arm subunit
	GFP-Dnali1	1.54	30.1	wild-type	Dynein arm subunit
	GFP-Dnali1	0.9	18.7	wild-type	Dynein arm subunit
	GFP-Dnali1	2.04	17.9	wild-type	Dynein arm subunit
	GFP-Dnali1	0.4	17.4	wild-type	Dynein arm subunit
	GFP-Hsp90ab1	2.69	55	wild-type	Chaperone
	GFP-Hsp90ab1	3.62	54	wild-type	Chaperone
	GFP-Hsp90ab1	3.4	51.2	wild-type	Chaperone
	GFP-Hsp90ab1	1.07	58.2	wild-type	Chaperone
	GFP-Dnai2	0.94	17.2	wild-type	Dynein arm subunit
	GFP-Dnai2	1.64	12	wild-type	Dynein arm subunit
	GFP-Dnai2	1.4	11.7	wild-type	Dynein arm subunit
	GFP-Dnai2	0.78	11.6	wild-type	Dynein arm subunit
	GFP-Dnai2	0.71	12.8	wild-type	Dynein arm subunit
	GFP-Dnai2	1.16	11.6	wild-type	Dynein arm subunit
	GFP-Dnai2	0.6	11.2	wild-type	Dynein arm subunit
	GFP-Dnai2	1.02	21.8	wild-type	Dynein arm subunit
	GFP-Dnai2	1.21	22.9	wild-type	Dynein arm subunit
	GFP-Dnai2	0.9	25.5	wild-type	Dynein arm subunit
	GFP-Dnai2	0.85	26	wild-type	Dynein arm subunit
	GFP-Dnai2	0.5	21	wild-type	Dynein arm subunit
	GFP-Dnai2	1.31	14.2	wild-type	Dynein arm subunit
	GFP-Dnaaf3	0.81	74.1	wild-type	Dynein arm assembly
	GFP-Dnaaf3	0.98	76.4	wild-type	Dynein arm assembly
	GFP-Dnaaf3	1.09	87.6	wild-type	Dynein arm assembly
	GFP-Dnaaf3	1.04	82.5	wild-type	Dynein arm assembly
	GFP-Dnaaf3	0.77	76.2	wild-type	Dynein arm assembly
	GFP-Dnaaf3	0.97	68.6	wild-type	Dynein arm assembly
	GFP-Dnaaf4	1.95	43.5	wild-type	Dynein arm assembly
	GFP-Dnaaf4	1.28	46.1	wild-type	Dynein arm assembly
	GFP-Dnaaf4	2.06	61.1	wild-type	Dynein arm assembly
	GFP-Dnaaf4	2.3	47.3	wild-type	Dynein arm assembly
	GFP-Dnaaf4	1.96	62.4	wild-type	Dynein arm assembly
	GFP-Dnaaf4	1.48	56.4	wild-type	Dynein arm assembly
	GFP-Dnaaf4	1.49	72	wild-type	Dynein arm assembly
	GFP-Dnaaf4	1.44	58.8	wild-type	Dynein arm assembly
	GFP-Dnaaf4	1.36	68	wild-type	Dynein arm assembly
	GFP-Dnaaf4	1.66	69.8	wild-type	Dynein arm assembly
	GFP-Dnaaf4	1.37	67.8	wild-type	Dynein arm assembly
	GFP-Dnaaf4	1.79	65.2	wild-type	Dynein arm assembly
	GFP-Dnaaf4	1.72	72.9	wild-type	Dynein arm assembly
	GFP-Dnaaf4	1.75	71.6	wild-type	Dynein arm assembly
	GFP-Dnai1	0.63	37.2	wild-type	Dynein arm subunit
	GFP-Dnai1	0.78	21.6	wild-type	Dynein arm subunit
	GFP-Dnai1	1.55	21.9	wild-type	Dynein arm subunit
	GFP-Dnai1	0.98	16.3	wild-type	Dynein arm subunit
	GFP-Heatr2	0.93	52.4	wild-type	Dynein arm assembly
	GFP-Heatr2	1.65	68.5	wild-type	Dynein arm assembly
	GFP-Heatr2	0.95	54.6	wild-type	Dynein arm assembly
	GFP-Heatr2	1.06	70.4	wild-type	Dynein arm assembly
	GFP-Heatr2	1.55	53.7	wild-type	Dynein arm assembly
	GFP-Heatr2	1.64	61.7	wild-type	Dynein arm assembly
	GFP-Heatr2	1.28	56.6	wild-type	Dynein arm assembly
	GFP-Heatr2	1.71	57.6	wild-type	Dynein arm assembly
	GFP-Heatr2	1.96	65.7	wild-type	Dynein arm assembly
	GFP-Heatr2	1.17	66.7	wild-type	Dynein arm assembly
	GFP-Heatr2	1.8	66	wild-type	Dynein arm assembly
	GFP-Heatr2	0.93	54.6	wild-type	Dynein arm assembly
	GFP-Heatr2	1.9	58.8	wild-type	Dynein arm assembly
	GFP-Heatr2	1.26	62.6	wild-type	Dynein arm assembly
	GFP-Ruvbl2	4.36	55.7	wild-type	Dynein arm assembly
	GFP-Ruvbl2	3.78	74	wild-type	Dynein arm assembly
	GFP-Ruvbl2	2.94	59.6	wild-type	Dynein arm assembly
	GFP-Ruvbl2	1.81	54.5	wild-type	Dynein arm assembly
	GFP-Ruvbl2	1.99	68.1	wild-type	Dynein arm assembly
	GFP-Ruvbl2	1.85	60.3	wild-type	Dynein arm assembly
	GFP-Ruvbl2	1.83	74.7	wild-type	Dynein arm assembly
	GFP-Ruvbl2	2.16	59.8	wild-type	Dynein arm assembly
	GFP-Dnai1	1.05	28.7	wild-type	Dynein arm subunit
	GFP-Dnai1	0.79	20.6	wild-type	Dynein arm subunit
	GFP-Dnai1	0.71	20	wild-type	Dynein arm subunit
	GFP-Dnai1	1.65	33.1	wild-type	Dynein arm subunit
	GFP-Dnai1	0.81	23.5	wild-type	Dynein arm subunit
	GFP-Dnai1	1.02	27.6	wild-type	Dynein arm subunit
	GFP-Dnai1	0.96	28.9	wild-type	Dynein arm subunit
	GFP-Dnai1	0.89	24.6	wild-type	Dynein arm subunit
	GFP-Dnai1	0.93	23	wild-type	Dynein arm subunit
	GFP-Hspa8	2.04	77.3	wild-type	Chaperone
	GFP-Hspa8	3.11	84.5	wild-type	Chaperone
	GFP-Hspa8	2.73	77.6	wild-type	Chaperone
	GFP-Hspa8	1.33	76.7	wild-type	Chaperone
	GFP-Hspa8	3.61	59.9	wild-type	Chaperone
	GFP-Hspa8	2.19	58.4	wild-type	Chaperone
	GFP-Hspa8	3.62	81.3	wild-type	Chaperone
	GFP-Hspa8	2.92	79.4	wild-type	Chaperone
	GFP-Hspa8	1.77	67.2	wild-type	Chaperone
	GFP-Pih1d3	0.83	53.9	wild-type	Dynein arm assembly
	GFP-Pih1d3	1.13	52.8	wild-type	Dynein arm assembly
	GFP-Pih1d3	1.18	65.2	wild-type	Dynein arm assembly
	GFP-Pih1d3	1.19	70.3	wild-type	Dynein arm assembly
	GFP-Pih1d3	0.72	71.3	wild-type	Dynein arm assembly
	GFP-Pih1d3	0.79	57.9	wild-type	Dynein arm assembly
	GFP-Pih1d3	0.74	60.2	wild-type	Dynein arm assembly
