# Supplementary material for: A liquid-like organelle at the root of motile ciliopathy
Source: eLife. 2018 Dec 18;7:e38497. doi: 10.7554/eLife.38497 (PMC6349401; doi:10.7554/eLife.38497)
Supplement: Figure 6—source data 1. [file elife-38497-fig6-data1.xlsx]

## Sheet: Gob Whole SG
Time	Goblet 1	Goblet 2	Goblet 3	Goblet 4	Goblet 5	Goblet 6	Goblet 7	Goblet 8	Goblet 9	Goblet 10	Goblet 11	Goblet 12	Goblet 13	Goblet 14	Goblet 15	Goblet 16				AVG	SD
0	0.98252	1.00977	1.01116	0.98583	0.987336	1.00306	1.02062	0.996507	1.0102	1.00182	1.00996	0.999163	1.00338	1.00798	1.00048	0.998334				1.00176	0.00990394
0.2085	1.01794	0.99021	0.989196	1.01468	1.01292	0.99695	0.97879	1.00348	0.989825	0.998152	0.990009	1.00085	0.996613	0.992083	0.999524	1.00167				0.998306	0.0100836
0.417	0	0	0	0	0	0	0	0	0	0	0	0	0	0	0	0				0	0
0.6255	0.09176	0.095298	0.107199	0.08304	0.043438	0.08393	0.129371	0.17443	0.085495	0.093467	0.053678	0.097923	0.056123	0.071898	0.078677	0.051827				0.0873471	0.0312463
0.834	0.183191	0.167226	0.179271	0.14954	0.08815	0.17476	0.233614	0.304375	0.171669	0.176705	0.099464	0.192234	0.110168	0.134605	0.153173	0.099437				0.163599	0.0527189
1.0425	0.273774	0.240194	0.283617	0.22818	0.132369	0.26248	0.331803	0.375275	0.240791	0.248426	0.144532	0.276898	0.158311	0.199433	0.223363	0.15301				0.235779	0.0653953
1.251	0.338802	0.30991	0.372829	0.30593	0.175968	0.34013	0.427299	0.461155	0.289161	0.32134	0.182962	0.34174	0.209829	0.248798	0.281879	0.19038				0.299882	0.0810954
1.4595	0.397663	0.352872	0.444221	0.39067	0.217152	0.42195	0.498831	0.533539	0.351465	0.373366	0.221664	0.411992	0.256698	0.300676	0.336095	0.237486				0.359146	0.0918518
1.668	0.431461	0.41569	0.467635	0.44834	0.257539	0.48758	0.526839	0.568312	0.405583	0.433512	0.271215	0.468103	0.298549	0.34422	0.392121	0.271462				0.40551	0.0909703
1.8765	0.49569	0.46486	0.513539	0.51374	0.291055	0.53615	0.579655	0.587767	0.429229	0.459304	0.298824	0.510863	0.328821	0.370073	0.425897	0.305243				0.444419	0.0961998
2.085	0.545965	0.494449	0.538944	0.56784	0.331354	0.60914	0.611069	0.672987	0.46765	0.500964	0.330561	0.5401	0.378484	0.41668	0.466632	0.348208				0.488814	0.101889
2.2935	0.586951	0.52348	0.573823	0.64086	0.371048	0.65152	0.669072	0.729795	0.486129	0.53975	0.364732	0.582068	0.409125	0.439817	0.498389	0.37863				0.527824	0.110514
2.502	0.620423	0.590619	0.568902	0.67122	0.397962	0.69609	0.690729	0.713058	0.503637	0.578225	0.400158	0.617424	0.458218	0.462671	0.547176	0.40445				0.55756	0.105707
2.7105	0.643553	0.600279	0.608352	0.71519	0.417386	0.74829	0.710151	0.745551	0.55161	0.630443	0.415234	0.665798	0.490583	0.506369	0.552896	0.427336				0.589314	0.110841
2.919	0.713567	0.625698	0.611901	0.7705	0.461316	0.77738	0.743846	0.769403	0.58811	0.654527	0.45403	0.699404	0.492512	0.522237	0.586343	0.449444				0.620014	0.114892
3.1276	0.728499	0.64292	0.631321	0.79584	0.495359	0.85321	0.761086	0.797163	0.583063	0.654447	0.495494	0.711967	0.5115	0.549529	0.608174	0.470771				0.643146	0.117698
3.3361	0.733061	0.67518	0.633431	0.80477	0.538148	0.86	0.767584	0.812037	0.61029	0.675812	0.506712	0.706948	0.513891	0.567806	0.618791	0.493411				0.657367	0.113021
3.5446	0.752591	0.697731	0.643785	0.83041	0.555978	0.85805	0.759472	0.855436	0.62991	0.709096	0.534921	0.746625	0.533686	0.590499	0.650397	0.51086				0.678715	0.112198
3.7531	0.764741	0.721389	0.65301	0.8642	0.602342	0.86866	0.786776	0.85132	0.653652	0.744686	0.550053	0.754064	0.547879	0.58615	0.66196	0.535806				0.696668	0.110712
3.9616	0.77101	0.737823	0.693743	0.87326	0.631594	0.88089	0.781111	0.829333	0.667015	0.7403	0.582928	0.788944	0.56316	0.600331	0.68626	0.558924				0.711664	0.102512
4.1701	0.773875	0.74211	0.679283	0.88154	0.649865	0.88118	0.792226	0.863613	0.679726	0.729568	0.594212	0.771709	0.572456	0.602452	0.705887	0.582237				0.718871	0.100883
4.3786	0.821164	0.757796	0.715629	0.916	0.671505	0.88023	0.809876	0.863984	0.68195	0.749675	0.608455	0.79689	0.588138	0.619419	0.704027	0.605905				0.736915	0.101185
4.5871	0.823819	0.772694	0.706566	0.94045	0.698466	0.91724	0.797051	0.869551	0.717598	0.752033	0.634473	0.800507	0.625546	0.639242	0.741109	0.602214				0.75241	0.0993062
4.7956	0.834968	0.786948	0.724187	0.94126	0.708734	0.91518	0.815711	0.850137	0.692889	0.761049	0.663739	0.801883	0.632687	0.654072	0.719299	0.627679				0.758151	0.093704
5.0041	0.845008	0.815503	0.719917	0.95135	0.722211	0.92142	0.820346	0.899433	0.701647	0.7502	0.670307	0.805797	0.657186	0.663881	0.770303	0.632336				0.771678	0.0957768
5.2126	0.834439	0.800748	0.711043	0.94805	0.737245	0.9544	0.883102	0.925235	0.725958	0.80214	0.706954	0.798734	0.678101	0.687904	0.753326	0.659637				0.787938	0.0943761
5.4211	0.866867	0.836616	0.70774	0.9131	0.764366	0.96862	0.840785	0.923329	0.701164	0.803279	0.742749	0.856101	0.693545	0.673687	0.76016	0.669886				0.795125	0.0919646
5.6296	0.877506	0.858795	0.720519	0.95028	0.789843	0.95764	0.888281	0.886308	0.715447	0.801269	0.718934	0.853957	0.673673	0.694131	0.770455	0.667365				0.801525	0.0938049
5.8381	0.876412	0.836379	0.733011	0.95608	0.793354	0.95113	0.837431	0.891594	0.720026	0.810734	0.756563	0.839103	0.675183	0.703078	0.771599	0.668345				0.801251	0.0872139
6.0466	0.854109	0.863132	0.719309	0.99162	0.803824	0.9476	0.85705	0.894001	0.722134	0.818479	0.756887	0.842696	0.695855	0.691556	0.776315	0.675182				0.806859	0.0908688
6.2551	0.878314	0.852756	0.716813	1.00351	0.818048	0.95404	0.856975	0.919417	0.705933	0.830244	0.7929	0.860238	0.721902	0.709532	0.782923	0.697468				0.818813	0.0907196
6.4636	0.884671	0.871025	0.72219	1.03603	0.832203	0.96805	0.890816	0.888856	0.726278	0.820283	0.789235	0.895722	0.721518	0.718781	0.778427	0.688843				0.827058	0.0963026
6.6721	0.909818	0.868069	0.724113	1.01876	0.855229	0.94918	0.857882	0.919107	0.736319	0.794133	0.802381	0.874019	0.723297	0.714852	0.79239	0.714465				0.828376	0.0902596
6.8806	0.882818	0.901779	0.737767	1.00129	0.851058	0.98183	0.901337	0.917013	0.725132	0.801991	0.79561	0.852921	0.735791	0.753474	0.814761	0.715413				0.835624	0.0876866
7.0891	0.880758	0.878356	0.709012	1.04889	0.8627	0.98142	0.899817	0.926648	0.748736	0.82907	0.794177	0.851887	0.738397	0.729971	0.8009	0.713026				0.83711	0.0955782
7.2976	0.919452	0.866629	0.721137	1.03956	0.841295	0.97279	0.891968	0.932989	0.736597	0.815281	0.795499	0.850646	0.733512	0.726484	0.818711	0.726959				0.836844	0.0937588
7.5061	0.884939	0.899946	0.719398	1.04898	0.860684	0.96974	0.862121	0.923764	0.759328	0.808044	0.788398	0.862683	0.763435	0.730341	0.816606	0.745553				0.840248	0.0889722
7.7146	0.886078	0.869594	0.736577	1.06011	0.842478	0.96783	0.902812	0.940179	0.757067	0.811314	0.810121	0.879686	0.767629	0.724351	0.812078	0.7443				0.844513	0.090438
7.9231	0.886154	0.906988	0.758849	1.05647	0.880636	0.98011	0.870755	0.955496	0.734876	0.813996	0.83106	0.851019	0.789593	0.731391	0.834312	0.748669				0.851898	0.089444
8.1316	0.878235	0.904021	0.747556	1.07128	0.867842	0.96626	0.870919	0.909865	0.732226	0.819794	0.823678	0.854375	0.803158	0.744247	0.834776	0.749109				0.848584	0.0867046
8.3401	0.892973	0.917824	0.758553	1.10213	0.877382	0.98964	0.888706	0.936924	0.729213	0.830843	0.836782	0.902178	0.797708	0.738065	0.817855	0.746051				0.860177	0.0971408
8.5486	0.936191	0.922543	0.763991	1.0825	0.894475	1.0159	0.873106	0.947442	0.738896	0.82678	0.842891	0.883802	0.775518	0.732435	0.826494	0.757769				0.863796	0.0978309
8.7571	0.933648	0.910095	0.759173	1.0653	0.880954	0.98891	0.919044	0.947309	0.757422	0.8037	0.845507	0.882855	0.770874	0.736905	0.833238	0.755487				0.861901	0.0927076
8.9656	0.912085	0.923819	0.775261	1.11704	0.897827	0.98808	0.888901	0.940689	0.781623	0.819607	0.841885	0.866588	0.773779	0.728002	0.817226	0.772766				0.865324	0.0959189
9.1742	0.924999	0.949732	0.75231	1.09854	0.93852	0.99003	0.89928	0.947408	0.749336	0.822326	0.855293	0.864268	0.797906	0.725889	0.835984	0.775128				0.870434	0.0983035
9.3827	0.921194	0.94501	0.754822	1.09965	0.907763	1.00626	0.891385	0.943998	0.758419	0.846298	0.870459	0.873054	0.782176	0.736766	0.819703	0.767316				0.870267	0.0973836
9.5912	0.905141	0.956261	0.764904	1.1016	0.896954	0.98331	0.911143	0.971947	0.778654	0.815139	0.826733	0.892022	0.778055	0.742878	0.818202	0.775584				0.869908	0.0964797
9.7997	0.938918	0.93981	0.75081	1.10243	0.907783	0.99524	0.893289	0.939243	0.788318	0.830214	0.870667	0.911342	0.74795	0.752669	0.805748	0.782809				0.872327	0.0970096
10.0082	0.918054	0.952457	0.762139	1.09331	0.912017	1.01935	0.888376	0.939277	0.781075	0.781377	0.846022	0.874887	0.775855	0.774505	0.82513	0.764271				0.869256	0.0959634
10.2167	0.925317	0.942559	0.762464	1.07949	0.901442	1.00348	0.896889	0.956341	0.78642	0.805792	0.846554	0.894651	0.760647	0.760538	0.79612	0.771554				0.868141	0.0942266
10.4252	0.932536	0.943087	0.765471	1.11194	0.921778	0.9964	0.890595	0.949735	0.797156	0.816377	0.851558	0.89591	0.757949	0.775788	0.823055	0.768924				0.874891	0.0957912
10.6337	0.938057	0.945781	0.786752	1.08161	0.916055	1.00255	0.884993	0.937713	0.788141	0.841102	0.863209	0.903382	0.783709	0.78633	0.824202	0.777826				0.878838	0.0862666
10.8422	0.935066	0.947008	0.768675	1.07626	0.944337	1.00032	0.92966	0.905404	0.788417	0.815121	0.842264	0.883763	0.786559	0.800859	0.841425	0.774598				0.877483	0.0872091
11.0507	0.956906	0.952216	0.758761	1.09353	0.948055	1.02453	0.873369	0.912654	0.771245	0.794917	0.862216	0.888894	0.790735	0.790663	0.828534	0.758466				0.875356	0.0969987
11.2592	0.931757	0.959898	0.753824	1.14567	0.938469	1.00709	0.901113	0.945791	0.78383	0.802391	0.890896	0.894129	0.790699	0.767092	0.819829	0.791791				0.882767	0.102317
11.4677	0.932911	0.955746	0.761916	1.12227	0.948598	1.00683	0.882147	0.945411	0.804702	0.808428	0.914852	0.894335	0.784091	0.784029	0.816743	0.789418				0.884527	0.0964205
11.6762	0.916962	0.965506	0.774828	1.09883	0.950033	0.97962	0.857007	0.936498	0.807431	0.791294	0.902173	0.8842	0.8079	0.769569	0.816481	0.803351				0.878855	0.0891281
11.8847	0.900715	0.969067	0.77025	1.10496	0.928477	0.99734	0.897895	0.956827	0.820296	0.778831	0.908608	0.881283	0.808753	0.795081	0.791042	0.788988				0.881151	0.0923438
12.0932	0.943859	0.993127	0.796385	1.08478	0.93091	1.01352	0.870933	0.94828	0.840448	0.7892	0.920753	0.853847	0.791691	0.790511	0.827725	0.793554				0.886845	0.0895762
12.3017	0.915003	0.985179	0.789182	1.07008	0.947235	1.01473	0.866547	0.955262	0.814173	0.772145	0.928649	0.850357	0.786008	0.792973	0.808926	0.802965				0.881213	0.090749
12.5102	0.904366	0.983077	0.80322	1.04156	0.933299	1.01141	0.856123	0.932135	0.797231	0.768443	0.968235	0.832268	0.824546	0.780718	0.821936	0.768344				0.876682	0.088235
12.7187	0.903202	0.973813	0.777709	1.03835	0.920436	0.99981	0.865003	0.960118	0.817715	0.797757	0.963968	0.850889	0.802113	0.790843	0.813278	0.787656				0.878916	0.0840491
12.9272	0.909776	0.996755	0.768967	1.00225	0.929802	0.99134	0.894853	0.94724	0.816931	0.792213	0.974389	0.859966	0.819093	0.80619	0.811506	0.79028				0.881972	0.0807162
13.1357	0.932287	0.999671	0.776741	0.98639	0.926274	1.00399	0.874077	0.947644	0.791981	0.791748	0.973642	0.867674	0.765131	0.80891	0.814704	0.78402				0.877805	0.0856102
13.3442	0.922108	0.976639	0.772689	0.95238	0.929978	1.02808	0.908888	0.933832	0.813298	0.792985	0.949753	0.870809	0.789829	0.793715	0.835756	0.785737				0.87853	0.0788114
13.5527	0.913111	0.993987	0.781542	0.93837	0.916849	1.01523	0.896817	0.934407	0.835275	0.774075	0.935689	0.887528	0.781433	0.805141	0.833232	0.791534				0.877139	0.0756879
13.7612	0.903403	0.998683	0.778947	0.92258	0.913302	1.0069	0.8842	0.954284	0.809779	0.798857	0.947904	0.90738	0.807441	0.796047	0.838919	0.807567				0.879762	0.0731131
13.9697	0.9329	0.999632	0.78408	0.87108	0.910961	1.00845	0.900163	0.95491	0.807425	0.776226	0.9371	0.917696	0.802907	0.790226	0.82582	0.811926				0.876969	0.0758326
14.1782	0.941374	0.999365	0.772179	0.85501	0.912184	1.01595	0.870454	0.960732	0.824404	0.784166	0.911507	0.901076	0.796873	0.805772	0.832656	0.802938				0.874165	0.0750661
14.3867	0.898143	0.995753	0.784395	0.80245	0.927047	1.01376	0.88745	0.968069	0.828539	0.774141	0.93724	0.875285	0.815303	0.797198	0.817507	0.817666				0.871247	0.0756468
14.5952	0.902073	1.02508	0.795879	0.80531	0.941455	0.99658	0.872163	0.971658	0.816761	0.744853	0.922185	0.89945	0.813485	0.789703	0.854012	0.796029				0.871667	0.0804811
14.8037	0.880157	1.00511	0.793401	0.79257	0.923502	0.9809	0.888804	0.959848	0.794838	0.758095	0.919737	0.884198	0.786881	0.812281	0.841472	0.816593				0.864899	0.074224
15.0123	0.926126	1.01239	0.776533	0.79626	0.91313	1.01001	0.878205	0.925403	0.814658	0.761306	0.902276	0.864706	0.792608	0.797403	0.841469	0.810095				0.863911	0.0763281
15.2208	0.924869	1.00988	0.786644	0.75584	0.91529	0.99611	0.888407	0.951315	0.82162	0.760261	0.905917	0.877164	0.807404	0.786406	0.829374	0.829052				0.865347	0.0778928
15.4293	0.919263	1.04779	0.780988	0.74893	0.917409	1.01313	0.889066	0.961792	0.793502	0.755504	0.904125	0.876398	0.816068	0.786984	0.819053	0.826934				0.866059	0.0874322
15.6378	0.908912	1.02245	0.790821	0.73475	0.926577	1.03293	0.876654	0.959098	0.822109	0.740587	0.931996	0.902824	0.810617	0.798696	0.818502	0.835569				0.869569	0.0878407
15.8463	0.908468	0.99444	0.791164	0.70742	0.928533	1.03324	0.880339	0.966089	0.809243	0.759913	0.911279	0.856536	0.821036	0.814429	0.81568	0.826742				0.864034	0.0853155
16.0548	0.920269	1.00087	0.795308	0.69575	0.951307	1.03027	0.856332	0.949039	0.814552	0.759787	0.927045	0.868943	0.831805	0.812463	0.802306	0.838817				0.865929	0.0876293
16.2633	0.906452	1.01739	0.783579	0.6703	0.959047	1.02266	0.84563	0.956467	0.829983	0.752911	0.904092	0.879217	0.827239	0.803875	0.818815	0.841152				0.863676	0.0919504
16.4718	0.888066	1.04482	0.800638	0.83349	0.950049	0.99977	0.86775	0.95927	0.843269	0.748701	0.917699	0.85761	0.843707	0.805902	0.8259	0.815913				0.87516	0.0771995
16.6803	0.9087	1.04026	0.768899	0.98492	0.945449	1.01246	0.856865	0.961886	0.827236	0.752093	0.90561	0.877218	0.841804	0.804039	0.811727	0.818402				0.882348	0.0845332
16.8888	0.902191	1.00387	0.788198	1.01325	0.934624	1.00588	0.847755	0.895951	0.817219	0.728308	0.909843	0.893609	0.823971	0.798187	0.818406	0.826047				0.875457	0.0815391
17.0973	0.890937	1.01258	0.803271	1.04149	0.947666	0.99266	0.863336	0.904722	0.821949	0.756021	0.904152	0.866328	0.842462	0.792844	0.824231	0.835615				0.881266	0.0796059
17.3058	0.917532	1.00844	0.772249	1.04112	0.958914	0.99916	0.883914	0.906923	0.806151	0.745849	0.921638	0.817421	0.83363	0.786067	0.826914	0.825145				0.878192	0.0874967
17.5143	0.892062	1.02564	0.795931	1.06419	0.949033	1.00633	0.871095	0.947893	0.804954	0.733309	0.909832	0.826295	0.846735	0.804605	0.836713	0.825696				0.88377	0.0901648
17.7228	0.907706	1.00787	0.797303	1.07547	0.940739	1.03589	0.871308	0.9294	0.839286	0.724586	0.927552	0.828478	0.840135	0.791259	0.82246	0.825326				0.885298	0.0931106
17.9313	0.928745	1.02268	0.800882	1.08141	0.939802	1.01229	0.872916	0.959608	0.805767	0.734374	0.912954	0.878382	0.871676	0.759297	0.814968	0.83032				0.889129	0.0951416
18.1398	0.92856	1.0297	0.782679	1.08295	0.94836	0.99293	0.840704	0.937905	0.80325	0.706217	0.901094	0.900445	0.866344	0.786241	0.82529	0.842279				0.885934	0.0960262
18.3483	0.899292	1.00655	0.782299	1.06734	0.964601	1.02254	0.870204	0.949329	0.789526	0.689434	0.906299	0.899601	0.836335	0.790996	0.826988	0.848001				0.884333	0.0975785
18.5568	0.900546	1.00865	0.819685	1.06583	0.952632	1.00431	0.883491	0.943597	0.796112	0.709777	0.920913	0.89754	0.818802	0.786096	0.827852	0.836219				0.885753	0.0917169
18.7653	0.907204	1.03456	0.789132	1.07277	0.937051	1.03789	0.861352	0.964994	0.798323	0.715435	0.935748	0.896051	0.844948	0.785246	0.824868	0.846756				0.890771	0.0985572
18.9738	0.914921	1.00984	0.765472	1.09409	0.951334	1.02941	0.847329	0.970543	0.8072	0.690866	0.928898	0.902	0.803851	0.777585	0.816083	0.856386				0.885363	0.105512
19.1823	0.925405	1.01627	0.7773	1.06241	0.942686	1.02526	0.857065	0.967366	0.782512	0.698664	0.944965	0.906554	0.80314	0.785552	0.834489	0.851231				0.886304	0.100637
19.3908	0.937783	0.994895	0.782746	1.06716	0.94741	1.02307	0.848994	0.948934	0.800817	0.707559	0.954761	0.925003	0.845466	0.802274	0.820698	0.84535				0.890807	0.0953468
19.5993	0.921778	1.01497	0.797022	1.05582	0.916751	1.03719	0.842041	0.938279	0.79185	0.710852	0.955025	0.922659	0.850324	0.802877	0.823746	0.845066				0.889141	0.0943277
19.8078	0.934661	1.01961	0.791295	1.06099	0.907845	1.00461	0.834926	0.92553	0.801715	0.706468	0.939792	0.934035	0.827719	0.804405	0.826123	0.848988				0.885545	0.0928948
20.0163	0.91602	1.01079	0.80231	1.07086	0.93563	1.00559	0.838748	0.945626	0.808023	0.676563	0.955973	0.952426	0.839444	0.801246	0.839544	0.867816				0.891663	0.0970768
20.2248	0.90457	1.00096	0.785272	1.05609	0.899355	1.01321	0.830477	0.91686	0.793381	0.700741	0.938834	0.899569	0.843761	0.804556	0.83394	0.850863				0.879527	0.0903463
20.4333	0.902339	0.998392	0.797843	1.07036	0.903908	1.02581	0.833426	0.934116	0.812305	0.671332	0.928892	0.929072	0.818155	0.795701	0.822958	0.840219				0.880302	0.0978269
20.6418	0.896916	1.00029	0.794723	1.0682	0.933474	1.03013	0.843906	0.93221	0.799896	0.66714	0.914352	0.925024	0.859803	0.789901	0.80772	0.864084				0.882986	0.0986372
20.8503	0.9008	0.996588	0.805484	1.0816	0.920269	1.04197	0.860899	0.950114	0.797643	0.687079	0.910045	0.94005	0.844242	0.807741	0.819906	0.880487				0.890307	0.0969145
21.0589	0.927633	1.00505	0.817615	1.07254	0.933372	1.02384	0.85309	0.955401	0.768717	0.675678	0.914171	0.910692	0.856235	0.794504	0.812494	0.853311				0.885896	0.0992618
21.2674	0.898944	0.999808	0.79091	1.07463	0.937114	1.01325	0.879229	0.965055	0.783578	0.679008	0.933513	0.893933	0.843987	0.803044	0.802943	0.853283				0.884514	0.0984507
21.4759	0.919839	0.985375	0.802819	1.05418	0.943412	1.04916	0.849903	0.933553	0.779766	0.685161	0.939853	0.930087	0.836772	0.804254	0.817385	0.857597				0.88682	0.0970764
21.6844	0.933282	0.974173	0.817739	1.06893	0.933363	1.05805	0.869728	0.958367	0.79766	0.659786	0.960068	0.927107	0.821212	0.806524	0.825626	0.86091				0.892033	0.101808
21.8929	0.936105	0.961303	0.813001	1.08298	0.942112	1.023	0.869572	0.929468	0.779892	0.65672	0.948475	0.907216	0.834956	0.777782	0.821598	0.845507				0.883105	0.101409
22.1014	0.927469	0.974889	0.784687	1.06977	0.930145	1.03205	0.877505	0.965684	0.78282	0.67827	0.945511	0.959937	0.835045	0.774386	0.838367	0.857047				0.889599	0.101279
22.3099	0.91302	0.988469	0.790259	1.06272	0.921696	1.03241	0.884434	0.948858	0.778802	0.731748	0.954391	0.929608	0.827568	0.795479	0.842063	0.875988				0.892345	0.091224
22.5184	0.962603	0.990511	0.791856	1.05701	0.931231	1.03971	0.860035	0.95335	0.791862	0.744535	0.944215	0.943309	0.868707	0.789196	0.824331	0.860432				0.897056	0.091344
22.7269	0.932734	0.99866	0.786029	1.02635	0.929906	1.00908	0.874544	0.964019	0.806693	0.790365	0.928412	0.934609	0.813506	0.800547	0.823342	0.862645				0.89259	0.080543
22.9354	0.929058	1.01051	0.782666	1.01054	0.926124	1.00152	0.864859	0.963192	0.811177	0.769175	0.918578	0.944034	0.818776	0.813148	0.818995	0.854097				0.889778	0.080501
23.1439	0.956486	1.00167	0.812962	1.03387	0.947112	1.0252	0.883977	0.947566	0.788728	0.771056	0.923002	0.955933	0.833958	0.78058	0.820782	0.879121				0.897625	0.0856403
23.3524	0.895594	0.991745	0.810522	0.99487	0.92908	1.02317	0.858631	0.962618	0.81082	0.777439	0.938537	0.97386	0.846942	0.801542	0.8085	0.869276				0.893322	0.0783097
23.5609	0.939795	0.993392	0.800586	1.03964	0.926298	1.03998	0.84773	0.957842	0.816935	0.749085	0.917817	0.951737	0.851867	0.786322	0.822093	0.884692				0.895363	0.0865739
23.7694	0.9375	0.98869	0.809788	1.01991	0.933058	1.04891	0.873923	0.936938	0.79995	0.742647	0.947827	0.926422	0.865274	0.798874	0.829074	0.860954				0.894984	0.0838304
23.9779	0.932853	1.00503	0.790216	1.07833	0.93512	1.05517	0.879994	0.955228	0.789914	0.704261	0.956594	0.941375	0.842044	0.796883	0.82744	0.864146				0.897162	0.100152
24.1864	0.930878	1.01043	0.776125	1.08183	0.95149	1.0454	0.8654	0.950673	0.80659	0.710139	0.933834	0.950712	0.847808	0.798783	0.822453	0.856163				0.896169	0.0994585
24.3949	0.950882	0.966685	0.776788	1.06446	0.929111	1.03626	0.875925	0.920457	0.785751	0.7102	0.937168	0.947873	0.846249	0.799756	0.793262	0.872416				0.888328	0.0953083
24.6034	0.927848	1.0074	0.7717	1.06499	0.914631	1.03386	0.877453	0.901806	0.805454	0.707479	0.9399	0.967103	0.835047	0.778642	0.826514	0.872333				0.88951	0.0968523
24.8119	0.914035	0.981563	0.784248	1.08614	0.937219	1.0347	0.840043	0.915122	0.818665	0.717733	0.944838	0.939919	0.879567	0.796664	0.819246	0.858085				0.891737	0.0935317
25.0204	0.941446	0.97313	0.789512	1.0859	0.943206	1.05111	0.870271	0.937875	0.793231	0.713294	0.956785	0.933304	0.891468	0.790167	0.824726	0.830682				0.895382	0.0980146
25.2289	0.976796	0.975532	0.806126	1.06782	0.941509	1.04974	0.872948	0.924717	0.809515	0.712306	0.933103	0.952576	0.87806	0.798973	0.83378	0.854609				0.899257	0.093028
25.4374	0.990898	0.937426	0.790884	1.03946	0.955293	1.04592	0.857362	0.954219	0.817732	0.711815	0.92961	0.955477	0.878677	0.777239	0.824718	0.869211				0.895996	0.09292
25.6459	0.949715	0.992782	0.788812	1.07127	0.953461	1.0637	0.860653	0.954652	0.799007	0.703497	0.94718	0.948962	0.850977	0.778775	0.846812	0.844775				0.897189	0.101012
25.8544	1.00088	0.96536	0.790084	1.05849	0.933038	1.05023	0.850989	0.942467	0.795591	0.704702	0.958974	0.974018	0.840548	0.777419	0.846772	0.864805				0.897148	0.100005
26.0629	0.982553	0.97935	0.811088	1.04042	0.935655	1.04746	0.854841	0.933575	0.797802	0.705803	0.941599	0.972464	0.849161	0.79463	0.845908	0.883151				0.898466	0.0931782
26.2714	0.959028	0.974117	0.776652	1.03656	0.932845	1.04818	0.829485	0.922662	0.799033	0.727753	0.945643	0.923073	0.841822	0.781782	0.847651	0.857539				0.887739	0.0912895
26.4799	0.980229	1.0024	0.773843	1.06024	0.915658	1.04613	0.845954	0.937096	0.820948	0.70611	0.948223	0.977662	0.854861	0.779496	0.845453	0.869991				0.897769	0.0990474
26.6884	0.990429	0.984983	0.790885	1.06915	0.92373	1.05864	0.842802	0.932726	0.797318	0.707194	0.933224	0.952752	0.869172	0.778717	0.833621	0.848685				0.894627	0.0999473
26.8969	1.00634	0.972936	0.783795	1.05137	0.920295	1.05851	0.855727	0.936351	0.817168	0.689688	0.961796	0.958831	0.889123	0.785803	0.82874	0.870363				0.899177	0.0997933
27.1055	0.999844	0.977749	0.795119	1.0625	0.937525	1.08471	0.853694	0.905072	0.776931	0.703362	0.96686	0.955092	0.867578	0.77586	0.821349	0.855133				0.896149	0.105136
27.314	0.983857	0.972374	0.789189	1.06163	0.933188	1.04175	0.822343	0.915534	0.810833	0.703283	0.92973	0.958342	0.849389	0.763257	0.835759	0.858642				0.889319	0.0982178
27.5225	0.992214	0.951452	0.78954	1.05769	0.937065	1.06113	0.831486	0.885669	0.814848	0.716268	0.912395	0.931606	0.830225	0.802291	0.825121	0.855369				0.887148	0.0942029
27.731	0.998596	0.974379	0.779335	1.05595	0.939871	1.03766	0.84387	0.878728	0.785196	0.729806	0.927715	0.9543	0.811086	0.765732	0.806156	0.836942				0.882833	0.0994172
27.9395	0.979493	0.944901	0.808928	1.06046	0.92682	1.06634	0.833219	0.87156	0.781297	0.73174	0.916797	0.913991	0.806931	0.772947	0.800974	0.851559				0.879247	0.0964947
28.148	0.969014	0.979822	0.794239	1.04935	0.908077	1.05998	0.814913	0.88386	0.759829	0.736614	0.941791	0.959943	0.833154	0.768141	0.814348	0.850562				0.882727	0.0988462
28.3565	0.971249	0.969941	0.799667	1.07122	0.93332	1.04639	0.807554	0.917695	0.787441	0.756556	0.935833	0.970688	0.829582	0.782777	0.825078	0.848473				0.890841	0.0954933
28.565	0.99685	0.974942	0.780709	1.06402	0.930782	1.06906	0.803465	0.886291	0.770006	0.749937	0.913452	0.976573	0.810448	0.762879	0.822823	0.858223				0.885654	0.103639
28.7735	1.0017	0.990564	0.7955	1.0504	0.924138	1.06793	0.827292	0.894844	0.77831	0.74976	0.913353	0.940369	0.825607	0.789417	0.822011	0.835236				0.887902	0.0971685
28.982	0.985545	1.00262	0.77966	1.05871	0.917921	1.07563	0.836282	0.856752	0.778115	0.755654	0.905514	0.928938	0.846738	0.773291	0.82102	0.851416				0.885863	0.0985741
29.1905	0.987783	0.976609	0.79386	1.06734	0.926566	1.06941	0.854312	0.915535	0.777996	0.753025	0.907321	0.962493	0.800954	0.762415	0.821661	0.831921				0.888075	0.100704
29.399	0.994375	0.983545	0.779751	1.07782	0.917672	1.03761	0.824039	0.901326	0.774165	0.749111	0.879258	0.957923	0.806364	0.797305	0.82766	0.834028				0.883872	0.0981426
29.6075	0.989038	0.96098	0.772982	1.07651	0.927068	1.0639	0.818343	0.899186	0.785496	0.743955	0.901962	0.972753	0.809196	0.78154	0.823899	0.840385				0.88545	0.101302
29.816	0.979731	0.975025	0.782713	1.05211	0.918137	1.05816	0.806271	0.895243	0.773298	0.757922	0.9166	0.964147	0.799233	0.786935	0.834233	0.856714				0.884779	0.0965307
30.0245	0.981236	0.973795	0.784313	1.07188	0.92093	1.03848	0.814012	0.891956	0.78473	0.74862	0.927188	0.959867	0.796006	0.774607	0.825059	0.859534				0.884513	0.0976362
30.233	0.960565	0.969314	0.773973	1.0595	0.929189	1.0363	0.834395	0.893711	0.749874	0.738206	0.894209	0.975578	0.815977	0.774132	0.834559	0.863308				0.881424	0.0971597
30.4415	0.966964	0.962505	0.772181	1.08529	0.947411	1.0637	0.809071	0.909832	0.742545	0.754251	0.90614	0.948362	0.773722	0.7901	0.81849	0.847435				0.881125	0.105064
30.65	1.01062	0.965964	0.775511	1.05655	0.95005	1.08286	0.799485	0.8614	0.760143	0.750658	0.872312	0.977703	0.785152	0.765047	0.821792	0.84196				0.879826	0.108159
30.8585	0.983534	0.973934	0.77941	1.05861	0.944013	1.05878	0.817334	0.886317	0.770066	0.736425	0.851702	0.978686	0.796211	0.754196	0.837385	0.843319				0.87937	0.103329
31.067	0.966157	0.96972	0.790946	1.07655	0.952354	1.0745	0.802314	0.904279	0.750074	0.737512	0.840547	0.954439	0.782492	0.752495	0.84633	0.840761				0.877592	0.107341

## Sheet: Gob Partial SG
Time	Goblet P1	Goblet P2	Goblet P3	Goblet P4	Goblet P5	Goblet P6	Goblet P7	Goblet P8	Goblet P9	Goblet P10	Goblet P11	Goblet P12	Goblet P13	Goblet P14	Goblet P15	Goblet P16							AVG	SD
0	1.00176	0.990056	0.996226	0.99048	0.990165	0.997756	0.996875	0.987264	0.970751	1.00312	1.00461	1.00579	0.989376	1.00313	1.00266	1.00692							0.996058	0.00911581
0.1992	0.998264	1.01012	1.00383	1.00943	1.01006	1.0023	1.0032	1.0128	1.02995	0.99676	0.995299	0.99405	1.01072	0.996808	0.997299	0.993024							1.00399	0.0092887
0.3984	0	0	0	0	0	0	0	0	0	0	0	0	0	0	0	0							0	0
0.5975	0.166518	0.269069	0.167236	0.23784	0.135506	0.15962	0.152513	0.092699	0.181688	0.204039	0.184588	0.118031	0.058464	0.185017	0.095142	0.076144							0.155257	0.0558039
0.7967	0.285248	0.470297	0.289219	0.464335	0.235962	0.309306	0.234767	0.179343	0.329638	0.375733	0.295431	0.225079	0.143235	0.249238	0.185305	0.133526							0.275354	0.0967895
0.9959	0.405419	0.609572	0.370014	0.641831	0.340584	0.420673	0.326796	0.23998	0.385441	0.458569	0.412389	0.308324	0.216765	0.34031	0.257701	0.199729							0.370881	0.121033
1.1951	0.465499	0.635236	0.444805	0.691606	0.419849	0.517755	0.391263	0.314657	0.446177	0.557454	0.549174	0.374465	0.279967	0.429062	0.333574	0.256951							0.444218	0.119101
1.3943	0.504122	0.69807	0.493282	0.826306	0.492708	0.571319	0.443726	0.347836	0.519589	0.624623	0.595053	0.443509	0.333202	0.493232	0.344753	0.298688							0.501876	0.13643
1.5934	0.577297	0.768617	0.513236	0.833016	0.506055	0.618158	0.514193	0.425042	0.589628	0.674146	0.683678	0.487349	0.376635	0.516164	0.42394	0.340421							0.552973	0.133021
1.7926	0.61842	0.710098	0.53843	0.890092	0.558601	0.664179	0.521965	0.470371	0.605164	0.692334	0.698412	0.54004	0.420708	0.520766	0.471626	0.393487							0.582168	0.123346
1.9918	0.664318	0.77917	0.565747	0.922706	0.593511	0.689645	0.542728	0.501901	0.680076	0.717454	0.772535	0.622083	0.4663	0.622615	0.528109	0.42311							0.63075	0.125676
2.191	0.681584	0.827268	0.575722	0.964312	0.64753	0.731134	0.595917	0.549699	0.695509	0.747334	0.803081	0.669869	0.47496	0.637953	0.553975	0.463479							0.663708	0.128323
2.3902	0.731646	0.823945	0.580917	0.962788	0.687279	0.728111	0.594044	0.558156	0.68342	0.771887	0.833687	0.712555	0.516306	0.642781	0.556158	0.499866							0.680222	0.124216
2.5894	0.744514	0.843205	0.589845	0.983945	0.684023	0.759614	0.617091	0.602475	0.722197	0.790264	0.834715	0.747374	0.544327	0.67815	0.593872	0.518023							0.703352	0.120775
2.7885	0.765942	0.794989	0.644635	0.973041	0.722541	0.787027	0.65286	0.653763	0.709512	0.810281	0.849947	0.784633	0.567062	0.702755	0.612277	0.558855							0.724382	0.106394
2.9877	0.786027	0.822844	0.671797	1.00696	0.725026	0.782405	0.642859	0.641831	0.73877	0.89852	0.824729	0.765183	0.585161	0.740749	0.637086	0.565173							0.739695	0.112936
3.1869	0.80023	0.843838	0.658135	1.04609	0.744993	0.779717	0.660981	0.66168	0.796822	0.859517	0.870338	0.769041	0.593764	0.709389	0.639297	0.604401							0.75239	0.115251
3.3861	0.810724	0.902844	0.658381	1.02578	0.773478	0.811493	0.711325	0.664865	0.800198	0.856303	0.87791	0.830575	0.580108	0.733515	0.660863	0.628255							0.770413	0.1136
3.5853	0.837915	0.830303	0.686231	1.02262	0.812785	0.868087	0.701414	0.691877	0.770584	0.80899	0.836347	0.904854	0.620026	0.699296	0.658791	0.642487							0.774538	0.106431
3.7844	0.850508	0.838708	0.665129	1.04083	0.805453	0.849398	0.698858	0.673175	0.766516	0.80215	0.835554	0.849937	0.596587	0.698217	0.681938	0.650663							0.768976	0.107959
3.9836	0.862552	0.849568	0.686763	1.03603	0.81069	0.825273	0.678849	0.67165	0.802239	0.855364	0.846565	0.850382	0.667775	0.814791	0.691429	0.68575							0.789729	0.098564
4.1828	0.882023	0.893741	0.6778	1.03257	0.803878	0.840156	0.69792	0.678505	0.821673	0.789396	0.854348	0.918307	0.696534	0.807741	0.665141	0.693573							0.797082	0.10278
4.382	0.881729	0.867202	0.672993	1.04116	0.839895	0.861459	0.695486	0.717073	0.814783	0.818853	0.845133	0.94782	0.664096	0.76846	0.711333	0.710589							0.803629	0.102538
4.5812	0.875254	0.899098	0.683372	1.03921	0.81438	0.815817	0.680575	0.721749	0.819287	0.804175	0.854038	0.933013	0.721599	0.776584	0.692467	0.737542							0.80426	0.0968311
4.7803	0.911823	0.891972	0.702311	1.04176	0.829267	0.864787	0.717134	0.743269	0.855778	0.791393	0.860212	0.936475	0.689531	0.766361	0.687219	0.765977							0.815954	0.0976819
4.9795	0.915763	0.872614	0.716567	1.03708	0.845601	0.861891	0.737241	0.75596	0.864328	0.835346	0.859827	0.984178	0.68868	0.784682	0.702174	0.76779							0.826858	0.0962459
5.1787	0.915436	0.89487	0.758779	1.01489	0.900584	0.873115	0.729751	0.754806	0.885273	0.829294	0.867872	0.991544	0.679339	0.870308	0.731285	0.787307							0.842778	0.0925928
5.3779	0.923124	0.912157	0.750718	1.04228	0.898817	0.868268	0.75165	0.7824	0.909029	0.841892	0.852643	0.970953	0.679834	0.871897	0.711754	0.807151							0.848411	0.0940509
5.5771	0.90458	0.895617	0.75971	1.00731	0.868443	0.868649	0.731898	0.789436	0.924541	0.845167	0.869889	0.972127	0.694687	0.896942	0.718789	0.816875							0.847791	0.0872192
5.7762	0.929742	0.888726	0.794877	1.02785	0.854117	0.880229	0.745024	0.79312	0.946982	0.891245	0.870916	0.974024	0.705415	0.890051	0.733695	0.8025							0.858032	0.0872851
5.9754	0.947218	0.925174	0.798511	1.03931	0.908155	0.884154	0.789249	0.80028	0.90663	0.854948	0.852788	1.0039	0.712539	0.966971	0.692511	0.815618							0.868622	0.0949483
6.1746	0.945509	0.969975	0.78069	0.983949	0.893577	0.885196	0.779717	0.825923	0.879834	0.865087	0.863241	0.964948	0.768156	0.917542	0.746776	0.807932							0.867378	0.0742793
6.3738	0.968298	0.949103	0.835133	1.00609	0.898911	0.898273	0.769624	0.793801	0.906742	0.85319	0.889428	0.983698	0.742465	0.890185	0.769325	0.834995							0.874329	0.0773971
6.573	0.952229	0.935015	0.840449	0.983924	0.905339	0.883787	0.77039	0.781969	0.863373	0.876785	0.909686	0.995915	0.752152	0.958319	0.728122	0.830045							0.872969	0.0809103
6.7722	0.979232	0.932241	0.868619	1.03058	0.920123	0.894567	0.777737	0.78327	0.893837	0.81414	0.941525	0.988806	0.742975	0.887997	0.748158	0.833462							0.877329	0.0849425
6.9713	0.964798	0.915352	0.889868	0.999941	0.913258	0.949911	0.755735	0.833202	0.896439	0.824097	0.890347	0.990241	0.767159	0.900598	0.759632	0.829461							0.880002	0.0759954
7.1705	0.971988	0.909363	0.889188	0.975971	0.915026	0.920573	0.777422	0.825301	0.876946	0.827787	0.89938	0.977261	0.714257	0.893638	0.759409	0.849727							0.873952	0.0750446
7.3697	0.975488	0.916432	0.894376	1.06184	0.910083	0.882874	0.79951	0.825606	0.901986	0.830513	0.937508	1.01991	0.743691	0.928824	0.726996	0.841598							0.887327	0.0883433
7.5689	0.98906	0.909735	0.879817	1.04405	0.882853	0.931591	0.807221	0.822003	0.926525	0.838291	0.88824	0.996285	0.740432	0.891786	0.748037	0.839331							0.883454	0.0817811
7.7681	0.952175	0.944464	0.910519	1.01569	0.899358	0.932778	0.787111	0.855849	0.891068	0.821337	0.896095	1.03733	0.714727	0.890975	0.737738	0.851199							0.883651	0.0858588
7.9672	0.965257	0.931523	0.903984	1.01281	0.931363	0.916685	0.795722	0.859792	0.897919	0.804819	0.87614	0.982342	0.737893	0.947054	0.733811	0.840848							0.883623	0.0804205
8.1664	0.968117	0.935373	0.933955	1.0151	0.928358	0.914927	0.770763	0.823763	0.89982	0.800374	0.889233	1.00965	0.72795	0.923196	0.725875	0.859318							0.882861	0.0877895
8.3656	0.951044	0.941964	0.93471	1.00427	0.905117	0.956862	0.816186	0.863823	0.89896	0.790529	0.895162	0.975683	0.705731	0.987324	0.731083	0.858585							0.888565	0.086348
8.5648	0.935655	0.910059	0.934442	1.02955	0.966932	0.915409	0.776542	0.861573	0.887371	0.796388	0.90067	1.0156	0.716381	0.878002	0.758269	0.850194							0.883315	0.0856408
8.764	0.969647	0.897119	0.924547	1.05832	0.968405	0.923125	0.813074	0.832657	0.892874	0.792564	0.876266	0.98266	0.696962	0.877692	0.735493	0.870924							0.882021	0.0905814
8.9631	1.00121	0.91281	0.918027	1.01106	0.971848	0.954829	0.799912	0.831298	0.885903	0.787586	0.851185	0.968622	0.695786	0.877721	0.709788	0.875845							0.878339	0.0926543
9.1623	1.00663	0.912121	0.883942	1.04876	0.937374	0.946543	0.800397	0.838569	0.870144	0.798703	0.865117	0.962559	0.741952	0.827283	0.720507	0.884254							0.877803	0.0874263
9.3615	1.00417	0.920133	0.907386	1.04837	0.955321	0.934156	0.813403	0.835862	0.851477	0.780992	0.865682	1.00686	0.729164	0.84036	0.721199	0.85979							0.879646	0.0928641
9.5607	0.986256	0.910846	0.906133	1.02901	0.962892	0.952512	0.783197	0.807315	0.85899	0.797953	0.882264	0.986457	0.791422	0.861158	0.734861	0.856983							0.881766	0.0829797
9.7599	0.986641	0.857974	0.90352	1.05414	0.951991	0.924982	0.787046	0.807497	0.837007	0.814113	0.880733	0.974655	0.728134	0.856243	0.704188	0.853921							0.870174	0.0910572
9.959	1.00236	0.903177	0.910796	1.05744	0.948786	0.946717	0.815196	0.81207	0.846296	0.768872	0.863287	0.990062	0.74496	0.802501	0.711979	0.837205							0.872607	0.0952786
10.1582	0.990324	0.863427	0.930233	1.02632	0.957741	0.951592	0.800302	0.831079	0.84528	0.776401	0.914181	0.953053	0.693113	0.875566	0.723324	0.825629							0.872348	0.0922802
10.3574	0.996501	0.848545	0.921614	1.02601	0.987926	0.944665	0.826328	0.798392	0.839703	0.780891	0.908303	0.926184	0.701139	0.869978	0.730007	0.839728							0.87162	0.0909844
10.5566	1.00256	0.835552	0.902995	1.04402	0.997618	0.983381	0.850514	0.80182	0.861968	0.829489	0.901868	0.906188	0.70871	0.884118	0.702633	0.827351							0.877549	0.094692
10.7558	1.00774	0.875284	0.897799	1.03179	1.01233	0.968747	0.824798	0.820751	0.830316	0.824428	0.883245	0.933547	0.748294	0.830971	0.698277	0.844725							0.877066	0.0915008
10.955	0.976492	0.858695	0.918007	1.0375	0.992053	0.964687	0.859631	0.818195	0.877347	0.81567	0.871966	0.988532	0.739998	0.866146	0.72224	0.841013							0.884261	0.0872773
11.1541	1.00009	0.855592	0.901211	1.03214	1.00445	0.956131	0.844719	0.833707	0.830324	0.828723	0.885383	0.933372	0.76061	0.860319	0.730686	0.83042							0.880493	0.0831606
11.3533	1.01067	0.886007	0.901052	1.01894	1.01963	0.950147	0.849675	0.851948	0.827426	0.812758	0.897384	0.927818	0.791486	0.811625	0.735755	0.860115							0.884527	0.0814864
11.5525	1.00897	0.867691	0.939566	1.02906	0.967031	0.944655	0.83177	0.818615	0.857483	0.832295	0.86492	0.962611	0.732207	0.79353	0.735767	0.848241							0.877151	0.087048
11.7517	0.983716	0.860699	0.91051	1.04727	0.97592	0.949247	0.868936	0.847895	0.775325	0.809743	0.881198	0.97156	0.740666	0.778581	0.740285	0.83511							0.873541	0.0901503
11.9509	0.95889	0.907842	0.916641	1.04924	0.962377	0.963458	0.804002	0.831536	0.799967	0.846759	0.898381	0.907162	0.738466	0.739075	0.7057	0.859429							0.868058	0.092147
12.15	1.00415	0.897407	0.923083	1.01183	0.973716	0.959979	0.834152	0.834173	0.792526	0.863456	0.837729	0.961979	0.721077	0.794455	0.699664	0.861472							0.873178	0.092013
12.3492	1.01758	0.907059	0.908731	1.08443	1.00636	0.933416	0.843105	0.825197	0.826494	0.823413	0.837595	0.933096	0.755195	0.703315	0.749412	0.856839							0.875702	0.100072
12.5484	0.997105	0.906268	0.913833	1.06561	1.0067	0.962331	0.835907	0.829564	0.808262	0.870339	0.855546	0.927322	0.72243	0.752956	0.726984	0.856216							0.877336	0.0968989
12.7476	0.985824	0.907523	0.941707	1.07393	1.02674	0.924658	0.839764	0.82836	0.807168	0.878397	0.851862	0.970644	0.731545	0.730391	0.758765	0.852617							0.881869	0.0985251
12.9468	0.988404	0.91883	0.933312	1.0548	1.00115	0.936535	0.81812	0.807988	0.78013	0.88756	0.847846	0.882334	0.73199	0.796376	0.711294	0.84624							0.871432	0.0941876
13.1459	0.985795	0.8671	0.938543	1.06612	1.02165	0.965518	0.804402	0.854968	0.758618	0.857957	0.863856	0.926703	0.733142	0.746932	0.71115	0.865697							0.873009	0.102474
13.3451	0.988569	0.880353	0.921251	1.04957	1.01312	0.943763	0.813079	0.868816	0.746318	0.850866	0.851325	0.895397	0.709277	0.763927	0.763403	0.870319							0.870585	0.0946385
13.5443	1.00951	0.932433	0.902766	1.05017	1.03206	0.960473	0.755859	0.84063	0.764267	0.86229	0.82343	0.908107	0.68153	0.719087	0.736141	0.84593							0.864043	0.11077
13.7435	1.02561	0.909862	0.894131	1.02771	1.02036	0.982995	0.750024	0.823563	0.790135	0.882917	0.8711	0.957222	0.665062	0.743625	0.735329	0.88884							0.873031	0.110016
13.9427	1.01837	0.907291	0.926709	1.00593	1.03631	0.934013	0.739769	0.832987	0.795865	0.894572	0.845447	0.935458	0.683174	0.7339	0.742572	0.87446							0.869176	0.104834
14.1418	1.03899	0.931346	0.93101	1.01985	1.0168	0.974683	0.715165	0.82723	0.774766	0.887128	0.841394	0.93407	0.668576	0.718122	0.713785	0.875532							0.866778	0.116994
14.341	1.0419	0.879187	0.928115	1.04306	1.06932	0.944254	0.731573	0.818303	0.782206	0.85558	0.843395	0.965288	0.723957	0.713692	0.712294	0.864912							0.869815	0.116833
14.5402	1.03693	0.894148	0.916847	1.05552	1.03396	0.955708	0.736265	0.794041	0.787051	0.863738	0.898065	0.933547	0.678594	0.702902	0.76691	0.86776							0.870125	0.114532
14.7394	1.01935	0.895072	0.922053	1.04499	1.0241	0.945463	0.723746	0.81513	0.792198	0.856293	0.892879	0.910875	0.718049	0.768047	0.753751	0.900185							0.873887	0.101922
14.9386	1.00049	0.901642	0.941801	1.02331	1.01615	0.95925	0.721875	0.788674	0.799328	0.867878	0.883742	0.944322	0.728938	0.696751	0.74807	0.865757							0.867999	0.10607
15.1378	1.01849	0.938022	0.934974	1.07784	1.05222	0.97832	0.706339	0.818437	0.861408	0.822924	0.88786	0.928367	0.72467	0.723298	0.743559	0.881525							0.881141	0.11491
15.3369	1.00032	0.927151	0.931842	1.01985	1.03094	0.956157	0.696125	0.802301	0.820891	0.83049	0.888527	0.933809	0.703827	0.803705	0.724829	0.89006							0.872552	0.105011
15.5361	0.999116	0.944734	0.947548	1.00585	1.01515	0.967552	0.686147	0.814172	0.847661	0.842398	0.861427	0.914966	0.690676	0.797981	0.775253	0.884823							0.874716	0.101171
15.7353	1.01158	0.876031	0.934073	1.02516	1.03234	0.946778	0.719283	0.781545	0.897099	0.800812	0.868592	0.894753	0.663749	0.741849	0.740609	0.890588							0.864052	0.109757
15.9345	1.01018	0.900763	0.934598	1.03883	1.05204	0.963347	0.700976	0.801708	0.942542	0.857495	0.831057	0.953542	0.662688	0.78236	0.74124	0.899462							0.879552	0.114269
16.1337	1.00124	0.902452	0.931219	1.01155	1.05338	0.965662	0.710343	0.830273	0.935557	0.786403	0.836817	0.918914	0.649578	0.790555	0.804711	0.890823							0.876218	0.107722
16.3328	1.02589	0.89505	0.957629	1.0559	1.07294	0.998911	0.703919	0.845784	0.962964	0.856204	0.843862	0.86067	0.670522	0.807431	0.757963	0.885026							0.887541	0.115732
16.532	0.994821	0.918713	0.967557	1.0777	1.01248	0.974329	0.719877	0.824816	0.950881	0.849392	0.846878	0.833774	0.675414	0.765139	0.758078	0.874279							0.877758	0.110575
16.7312	1.03827	0.910018	0.955725	1.02168	1.03583	0.997514	0.713538	0.822723	0.912514	0.845623	0.836034	0.930742	0.705658	0.753728	0.778122	0.893088							0.884425	0.107285
16.9304	1.01727	0.940641	0.935817	1.04464	1.02974	0.989324	0.717923	0.835493	0.973765	0.850744	0.814247	0.906511	0.708725	0.819003	0.749759	0.892808							0.889151	0.105736
17.1296	0.992317	0.902651	0.972538	1.00849	1.01721	0.967083	0.741681	0.834328	0.976308	0.883853	0.810534	0.868711	0.76788	0.791136	0.770554	0.901705							0.887937	0.0908239
17.3287	1.02751	0.905638	0.957907	1.0416	0.996446	1.01178	0.752449	0.844653	0.952029	0.89837	0.820037	0.879051	0.699194	0.824197	0.769392	0.915351							0.893475	0.0995463
17.5279	1.02866	0.906491	0.978491	1.0208	1.01526	0.976991	0.768641	0.890505	0.920185	0.907218	0.804836	0.869051	0.69902	0.802522	0.747173	0.93191							0.891735	0.0992336
17.7271	0.993416	0.886855	1.01343	1.02557	1.00878	0.986905	0.753785	0.900672	0.912298	0.852573	0.799718	0.859112	0.689187	0.809691	0.746301	0.943887							0.886387	0.102351
17.9263	1.01732	0.895528	1.00276	1.05878	0.998748	0.99174	0.778447	0.892032	0.975778	0.899431	0.766493	0.918695	0.699437	0.871456	0.754119	0.936855							0.903601	0.103062
18.1255	0.968989	0.872507	1.00009	1.02336	1.02266	0.998312	0.756536	0.893871	0.968658	0.88223	0.781275	0.916093	0.668111	0.798531	0.760502	0.912609							0.889021	0.105245
18.3246	0.996296	0.892062	0.986014	1.02902	1.01203	0.970996	0.757566	0.863769	0.941186	0.911234	0.760846	0.929727	0.694583	0.817816	0.732877	0.912129							0.88801	0.102886
18.5238	0.986062	0.897835	1.01863	1.06897	1.01385	0.961369	0.748346	0.884611	0.948955	0.851597	0.753586	0.963288	0.634927	0.745232	0.734534	0.944702							0.884781	0.122492
18.723	0.976099	0.88521	0.993165	1.07722	1.0012	0.939214	0.713107	0.869074	1.01333	0.883638	0.780732	0.861861	0.664317	0.78595	0.782967	0.937493							0.885286	0.112568
18.9222	0.992267	0.86312	0.984735	1.02488	1.01519	0.955614	0.766302	0.858769	0.965632	0.869238	0.759805	0.856384	0.650005	0.833644	0.750426	0.926237							0.879515	0.105666
19.1214	0.994354	0.892042	1.00943	1.03281	1.03408	0.978607	0.802633	0.896357	0.941153	0.854411	0.783655	0.933137	0.65528	0.811034	0.717939	0.919475							0.891025	0.109167
19.3206	1.02476	0.883971	1.01956	1.02686	1.03632	0.934321	0.802433	0.863166	0.980839	0.858611	0.787283	0.886377	0.684577	0.790146	0.72314	0.941718							0.890255	0.108386
19.5197	1.00439	0.886681	0.971927	1.01139	1.01374	0.970013	0.842038	0.896026	0.985485	0.820971	0.791189	0.959662	0.65978	0.804028	0.725481	0.940063							0.892679	0.105162
19.7189	1.02579	0.834922	0.983734	1.03074	1.01976	0.988939	0.803153	0.894038	0.987509	0.836868	0.779754	0.929839	0.668753	0.863359	0.710309	0.935413							0.893305	0.110159
19.9181	1.00533	0.843418	0.974988	1.00023	1.00698	0.980489	0.799005	0.875921	1.02184	0.836918	0.809406	0.987092	0.648266	0.774214	0.717525	0.92506							0.887918	0.112935
20.1173	1.0096	0.853071	0.99324	0.993327	1.0084	0.983681	0.81971	0.858811	1.03012	0.810194	0.797943	0.946774	0.634244	0.779206	0.719377	0.900028							0.883608	0.114471
20.3165	1.00602	0.849075	1.00348	1.01749	1.00737	0.954881	0.850244	0.860745	1.02908	0.839352	0.827599	1.00232	0.626021	0.745184	0.694513	0.894149							0.887969	0.120397
20.5156	1.02719	0.798799	0.961677	0.967342	1.0165	0.981468	0.778362	0.908425	0.997686	0.767179	0.823374	1.01713	0.618779	0.824319	0.686694	0.889359							0.879018	0.122472
20.7148	1.00964	0.831103	0.989633	1.04351	1.01465	0.954473	0.799895	0.9394	1.03901	0.819352	0.800498	1.01315	0.621582	0.793228	0.717981	0.855319							0.890151	0.123518
20.914	1.02025	0.831178	0.998534	1.03387	1.06385	0.954863	0.798659	0.925006	1.03702	0.810282	0.847895	1.01408	0.634873	0.806541	0.723251	0.902051							0.900138	0.122578
21.1132	1.00832	0.802835	1.00887	1.03085	1.05274	0.965721	0.829785	0.925933	1.05334	0.818606	0.801302	0.946551	0.666359	0.805639	0.696454	0.884812							0.893633	0.119883
21.3124	0.995043	0.869292	0.994246	1.02452	1.0222	0.967601	0.821288	0.886983	1.0214	0.821832	0.824177	0.993876	0.640325	0.796525	0.679396	0.886684							0.890337	0.117561
21.5115	0.984974	0.843567	1.01994	1.09819	1.04883	0.956906	0.815428	0.913902	1.07328	0.856605	0.803359	1.00379	0.658431	0.830734	0.667378	0.888223							0.903971	0.128933
21.7107	1.01513	0.809535	1.01745	1.09377	1.01869	1.00082	0.815735	0.882965	1.02739	0.854183	0.797646	1.04754	0.675096	0.831603	0.680013	0.901839							0.904338	0.127071
21.9099	0.966559	0.841325	0.984828	1.07287	1.0245	0.971242	0.830587	0.900986	1.11163	0.794401	0.809436	1.03607	0.616515	0.883018	0.69391	0.882854							0.901295	0.131433
22.1091	1.00322	0.836906	0.990343	1.06667	1.04721	0.974718	0.820255	0.907014	1.04055	0.821017	0.785167	0.99009	0.614652	0.851385	0.694462	0.902967							0.896664	0.126836
22.3083	1.00389	0.835745	1.01898	1.00643	1.0224	0.962496	0.825494	0.890691	1.04314	0.814399	0.789851	0.998228	0.659568	0.841735	0.690618	0.90793							0.894474	0.117032
22.5074	1.03601	0.809129	1.03378	1.04143	1.03262	0.974506	0.84173	0.921106	1.02264	0.810445	0.768644	1.00063	0.626889	0.857868	0.659099	0.909916							0.896653	0.131434
22.7066	1.01184	0.836321	0.994438	1.02419	1.00398	0.984903	0.844343	0.884947	1.08201	0.81957	0.759089	0.957241	0.681324	0.828345	0.69083	0.901726							0.894068	0.117559
22.9058	1.02097	0.85926	1.02708	1.05681	0.994483	0.947637	0.831278	0.883948	1.05821	0.832111	0.813529	0.965432	0.656764	0.83492	0.674905	0.882907							0.896264	0.119567
23.105	1.04997	0.852413	1.00944	1.0354	1.03064	0.958014	0.856997	0.902129	1.06479	0.862923	0.793082	0.904123	0.684597	0.810381	0.662512	0.879065							0.897281	0.1195
23.3042	1.04553	0.871798	1.01294	1.05268	0.989991	0.958702	0.866426	0.883782	1.03265	0.897115	0.801228	0.939335	0.638627	0.882074	0.641345	0.861873							0.898506	0.121665
23.5034	1.0288	0.852522	1.04614	1.0861	1.01734	0.947095	0.917723	0.906721	1.02459	0.875911	0.815386	0.907783	0.692181	0.93646	0.675659	0.869392							0.912488	0.113961
23.7025	1.09463	0.846721	1.07361	1.09551	1.02097	0.970493	0.872533	0.922757	1.06801	0.886347	0.851356	0.91558	0.691535	0.914484	0.683514	0.843702							0.921984	0.124236
23.9017	1.07276	0.822402	1.02486	1.06932	1.03365	0.963256	0.895446	0.920125	1.00807	0.843286	0.852371	0.92279	0.687477	0.89039	0.656967	0.845496							0.906792	0.119021
24.1009	1.03382	0.84859	1.04077	1.09581	0.984816	0.951935	0.888868	0.936875	1.017	0.834686	0.849196	0.987709	0.706765	0.89442	0.685336	0.838408							0.912188	0.112689
24.3001	1.03058	0.843577	1.04931	1.08032	1.01657	0.972336	0.928472	0.929608	1.0513	0.819978	0.786138	0.997721	0.703874	0.918137	0.654307	0.833386							0.913476	0.124512
24.4993	1.03828	0.880573	1.04159	1.03322	0.969575	0.990076	0.925357	0.907304	1.03194	0.856166	0.796523	0.954418	0.659198	0.885312	0.672113	0.817929							0.903724	0.117419
24.6984	1.02681	0.855544	1.0896	1.06021	1.01319	0.98696	0.958223	0.951011	1.05019	0.832404	0.815256	0.90756	0.712398	0.876932	0.702766	0.843701							0.917673	0.115436
24.8976	1.03062	0.882774	1.06359	1.08647	1.03818	0.973797	0.949293	0.904433	1.08204	0.837394	0.850079	0.93913	0.692019	0.847148	0.679843	0.847225							0.919002	0.122088
25.0968	1.04409	0.887198	1.05095	1.10537	0.987887	0.982751	0.967911	0.876287	1.11194	0.831362	0.879322	0.960708	0.716174	0.872428	0.645277	0.839176							0.922427	0.126112
25.296	1.0176	0.911667	1.04554	1.04527	0.997246	0.957763	0.967308	0.851079	1.1186	0.876534	0.866719	0.928734	0.68419	0.889508	0.651725	0.845697							0.915949	0.120789
25.4952	1.01829	0.864365	1.06081	1.05074	1.0334	0.947209	0.975958	0.919921	1.09054	0.846512	0.873646	0.935941	0.678687	0.947786	0.68111	0.851691							0.923537	0.118277
25.6943	1.0583	0.888231	1.03547	1.0474	1.0138	1.00499	0.93928	0.934628	1.05046	0.832516	0.898023	0.921043	0.686922	0.908653	0.661441	0.83358							0.919671	0.117324
25.8935	1.01312	0.885664	1.04589	1.06106	1.02508	0.973173	0.945815	0.925271	1.0639	0.796844	0.865714	0.920419	0.694389	0.930056	0.659089	0.833112							0.914912	0.118636
26.0927	1.02451	0.900047	1.0443	1.06938	0.998268	0.943348	0.932584	0.912825	1.06572	0.780673	0.877852	0.880468	0.669589	0.906641	0.671849	0.82814							0.906637	0.119895
26.2919	1.01377	0.91208	1.06335	1.06044	1.01292	0.978737	0.949622	0.940478	1.10387	0.748686	0.854255	0.918351	0.666696	0.864656	0.6616	0.850981							0.91253	0.129387
26.4911	0.984133	0.872393	1.0602	1.06727	1.03221	0.977883	0.94269	0.881752	1.08171	0.81044	0.843222	0.938213	0.711015	0.871403	0.668543	0.831377							0.910903	0.118801
26.6902	0.980349	0.844052	1.05162	1.13522	1.03333	0.970622	0.941208	0.922938	1.06015	0.797647	0.865842	0.957096	0.686707	0.895697	0.645255	0.833077							0.913801	0.128764
26.8894	0.959889	0.833699	1.07046	1.07924	1.01931	0.946332	0.958513	0.922784	1.07729	0.797149	0.839067	0.967994	0.652156	0.834381	0.650363	0.838585							0.902951	0.130269
27.0886	0.976071	0.837127	1.09271	1.09196	1.00485	0.974008	0.983622	0.895703	1.08348	0.820503	0.87467	0.937896	0.646512	0.830377	0.675192	0.834248							0.909933	0.130302
27.2878	0.982605	0.847592	1.08041	1.12536	1.0091	0.967623	0.983313	0.910474	1.05848	0.82131	0.834455	0.928128	0.663777	0.840727	0.652985	0.826653							0.908312	0.131679
27.487	0.999238	0.884851	1.07674	1.10496	1.01793	0.940425	1.02299	0.944338	1.04846	0.801014	0.877538	0.965504	0.673679	0.842812	0.674753	0.834048							0.91933	0.126539
27.6862	0.971829	0.876549	1.03696	1.1187	1.05737	0.958264	0.966265	0.939707	1.04333	0.765317	0.866496	0.993347	0.691196	0.844857	0.668657	0.846026							0.915304	0.126063
27.8853	0.973236	0.892344	1.06297	1.06532	1.05389	0.95708	0.967902	0.923365	1.01952	0.774671	0.851296	1.01207	0.646688	0.848345	0.6622	0.861374							0.910766	0.127316
28.0845	1.00026	0.876318	1.04039	1.12861	1.03828	0.952868	0.959475	0.911744	1.03361	0.795953	0.834136	1.04014	0.649261	0.7793	0.664974	0.835734							0.908816	0.136105
28.2837	0.983086	0.881622	1.0827	1.08122	1.03555	0.945876	0.992469	0.915308	1.04015	0.706288	0.86958	0.99585	0.611119	0.853897	0.661338	0.84642							0.906405	0.140257
28.4829	0.976451	0.924112	1.04726	1.1064	1.03551	0.99725	0.974496	0.903315	1.06792	0.750155	0.877357	1.00598	0.676296	0.811435	0.647769	0.858923							0.91629	0.133567
28.6821	1.00197	0.912536	1.07299	1.10269	1.00239	0.951298	0.953131	0.911667	1.03541	0.722408	0.871413	1.00256	0.679713	0.784188	0.657876	0.829061							0.905707	0.133212
28.8812	0.991167	0.884589	1.06837	1.09755	1.02891	0.970611	0.965804	0.911029	1.07032	0.742722	0.893915	1.03528	0.658931	0.843986	0.655912	0.843564							0.916416	0.1355
29.0804	0.973381	0.899655	1.08282	1.10616	1.02231	0.948213	0.965399	0.885449	1.03989	0.686935	0.881822	1.03405	0.686916	0.868123	0.644002	0.827762							0.909556	0.137401
29.2796	1.02203	0.930749	1.06235	1.11824	1.04699	0.943489	0.937637	0.926568	1.0683	0.699573	0.853788	0.996751	0.674009	0.827864	0.675676	0.841003							0.914064	0.137465
29.4788	0.990717	0.887641	1.0571	1.09059	1.00737	0.972835	0.949498	0.92664	1.06086	0.676267	0.898396	1.01394	0.676909	0.861614	0.66515	0.862329							0.912366	0.133151
29.678	1.02034	0.890317	1.0518	1.1144	0.986647	0.965583	0.984679	0.883762	1.06815	0.711161	0.885927	0.998537	0.656267	0.798835	0.671977	0.849681							0.908629	0.136849

## Sheet: MCC Whole Dynap
time	Full 1	Full 2	Full 3	Full 4	Full 5	Full 6	Full 7	Full 8	Full 9	Full 10	Full 11	Full 12	Full 13	Full 14			average	stdev
0	0.99636	0.994134	1.01633	0.99707	0.998911	0.996039	1.01667	0.977164	1.01034	1.00724	1.00669	1.00834	1.00089	1.00582			1.00229	0.0102821
0.2099	1.00377	1.00591	0.983726	1.0029	1.00111	1.00403	0.983143	1.02399	0.989358	0.99261	0.993219	0.991525	0.999075	0.99395			0.997737	0.0105649
0.4199	0	0	0	0	0	0	0	0	0	0	0	0	0	0			0	0
0.6298	0.05768	0.09971	0.082301	0.09239	0.070914	0.114635	0.086379	0.077558	0.063743	0.058273	0.058592	0.051234	0.069587	0.064321			0.0748084	0.0183415
0.8398	0.119064	0.153374	0.163952	0.17378	0.121634	0.201245	0.15705	0.146284	0.122054	0.092592	0.096565	0.09708	0.128914	0.100125			0.133837	0.0330848
1.0497	0.154938	0.216899	0.217283	0.26174	0.170511	0.285112	0.207318	0.199071	0.172311	0.139324	0.134905	0.134018	0.165065	0.13924			0.185552	0.0477365
1.2596	0.173897	0.241477	0.258352	0.3125	0.20864	0.34135	0.259906	0.234601	0.228309	0.176036	0.162052	0.178234	0.206155	0.171882			0.225242	0.0544207
1.4696	0.209559	0.294631	0.292913	0.3623	0.245589	0.420087	0.322662	0.280595	0.250194	0.211245	0.184911	0.203547	0.239634	0.201809			0.265691	0.068007
1.6795	0.24524	0.32439	0.339308	0.43311	0.274071	0.442646	0.347891	0.330277	0.286116	0.245651	0.216322	0.241719	0.283545	0.227128			0.302672	0.0713139
1.8894	0.276385	0.364312	0.388905	0.46947	0.314321	0.478464	0.397348	0.366037	0.323681	0.269419	0.237983	0.275925	0.30951	0.261623			0.338099	0.0756376
2.0994	0.283747	0.393318	0.411862	0.50558	0.349992	0.516346	0.428451	0.400571	0.356301	0.302029	0.255209	0.292723	0.331889	0.296875			0.366064	0.0807777
2.3093	0.322056	0.412449	0.453531	0.57669	0.360911	0.546498	0.462084	0.438674	0.380256	0.324143	0.288965	0.311222	0.360528	0.317651			0.396833	0.0891016
2.5193	0.357655	0.457135	0.476545	0.58239	0.404835	0.579463	0.4813	0.468737	0.430944	0.341026	0.300704	0.336374	0.393441	0.345033			0.425399	0.0877602
2.7292	0.368145	0.4613	0.512965	0.61358	0.405089	0.596571	0.506234	0.463107	0.44654	0.375975	0.329411	0.359245	0.422366	0.349112			0.443546	0.0890176
2.9391	0.39924	0.487962	0.530149	0.6454	0.440176	0.638774	0.53243	0.476967	0.488313	0.394593	0.350731	0.368102	0.4483	0.382809			0.470282	0.0927091
3.1491	0.44705	0.517148	0.572371	0.70422	0.456261	0.641393	0.556358	0.492671	0.521138	0.416964	0.357003	0.403127	0.476761	0.387512			0.496427	0.0982013
3.359	0.449047	0.535335	0.577762	0.7369	0.477805	0.649001	0.577745	0.517523	0.529981	0.430609	0.376177	0.412969	0.478442	0.406209			0.511107	0.100466
3.569	0.478187	0.548916	0.601835	0.73763	0.505908	0.655661	0.589025	0.567518	0.546709	0.450854	0.395316	0.432335	0.491871	0.434388			0.531154	0.0950198
3.7789	0.498783	0.563042	0.613459	0.76909	0.537005	0.662946	0.609589	0.539966	0.572754	0.483669	0.399852	0.440511	0.518914	0.452782			0.547312	0.0965418
3.9888	0.527896	0.560146	0.64772	0.81688	0.552883	0.679108	0.64874	0.568	0.597455	0.497834	0.405614	0.456015	0.544183	0.459637			0.568722	0.105998
4.1988	0.523558	0.578146	0.646553	0.82082	0.559706	0.692631	0.681843	0.611363	0.614495	0.502265	0.42878	0.459971	0.555141	0.473187			0.582033	0.106172
4.4087	0.550599	0.593461	0.680185	0.83406	0.57778	0.697336	0.674711	0.618759	0.630748	0.518837	0.439252	0.495769	0.569207	0.495116			0.598273	0.102185
4.6186	0.579028	0.594858	0.689908	0.85831	0.58126	0.731739	0.711481	0.595532	0.641978	0.521198	0.461496	0.49566	0.590404	0.512976			0.611845	0.10712
4.8286	0.596947	0.60848	0.696411	0.87291	0.584243	0.72776	0.700098	0.646224	0.659529	0.541989	0.468129	0.505247	0.580675	0.526308			0.622496	0.105458
5.0385	0.590151	0.616871	0.718206	0.91557	0.60511	0.72649	0.738883	0.647775	0.673265	0.53909	0.475406	0.530739	0.604377	0.541636			0.637398	0.112585
5.2485	0.614015	0.629998	0.736143	0.89556	0.604393	0.755361	0.750066	0.674144	0.65808	0.556217	0.489878	0.524129	0.632372	0.535637			0.646857	0.10982
5.4584	0.60858	0.634623	0.747565	0.89179	0.615873	0.75661	0.764044	0.687871	0.693054	0.551066	0.499259	0.53652	0.652655	0.560818			0.657166	0.107913
5.6683	0.625634	0.63787	0.751364	0.89937	0.641577	0.761351	0.764036	0.682966	0.704904	0.553643	0.519706	0.553668	0.652106	0.563387			0.665113	0.104744
5.8783	0.644994	0.645155	0.755018	0.91574	0.64673	0.758343	0.776694	0.708139	0.679164	0.560402	0.542187	0.551903	0.659583	0.571495			0.672539	0.104566
6.0882	0.652543	0.643168	0.756754	0.94641	0.64595	0.758073	0.808608	0.724938	0.689083	0.575868	0.554582	0.585207	0.6587	0.586041			0.684709	0.107203
6.2982	0.660106	0.662169	0.759274	0.93193	0.653538	0.73765	0.799862	0.692294	0.731946	0.564224	0.53942	0.583413	0.679783	0.577088			0.683764	0.105464
6.5081	0.676761	0.66871	0.793331	0.95342	0.672761	0.731435	0.805572	0.733475	0.723352	0.580333	0.553899	0.595204	0.661253	0.596692			0.696157	0.106557
6.718	0.68537	0.667627	0.787019	0.97293	0.668012	0.747805	0.816045	0.745427	0.713956	0.592105	0.55441	0.599005	0.685091	0.606381			0.702942	0.108933
6.928	0.683233	0.686945	0.796106	0.97851	0.686343	0.743172	0.82269	0.745639	0.724429	0.587005	0.567563	0.602451	0.693168	0.630635			0.710564	0.107474
7.1379	0.686219	0.698043	0.804119	0.9585	0.702728	0.743545	0.805696	0.756325	0.750125	0.589663	0.557751	0.62601	0.701228	0.619931			0.714277	0.103053
7.3478	0.705937	0.690805	0.79668	0.93427	0.686628	0.741342	0.792723	0.77428	0.764906	0.596864	0.557013	0.641566	0.721958	0.616103			0.715791	0.0973067
7.5578	0.721804	0.680734	0.804864	1.00447	0.704542	0.758354	0.808596	0.746203	0.781564	0.596369	0.584414	0.63704	0.743032	0.628733			0.728623	0.108158
7.7677	0.740999	0.697731	0.797313	1.00848	0.725427	0.745509	0.825317	0.750554	0.780639	0.605352	0.587145	0.657607	0.727352	0.63911			0.734895	0.105501
7.9777	0.730848	0.71624	0.813351	0.98703	0.729155	0.727936	0.828199	0.766577	0.791032	0.613007	0.612334	0.656599	0.739555	0.624223			0.738292	0.100442
8.1876	0.736923	0.71128	0.820851	1.00666	0.721084	0.705147	0.839584	0.772025	0.773998	0.594696	0.609989	0.6575	0.734042	0.643964			0.737696	0.106032
8.3975	0.748561	0.711285	0.794845	1.03167	0.740875	0.692099	0.82595	0.793122	0.799255	0.603612	0.614386	0.670949	0.750297	0.640038			0.744067	0.108843
8.6075	0.749093	0.71894	0.839462	1.04416	0.756108	0.713398	0.828219	0.781695	0.803339	0.620374	0.627192	0.68055	0.752758	0.644313			0.754257	0.109008
8.8174	0.741553	0.733982	0.828166	1.06219	0.751297	0.716687	0.850466	0.803846	0.777856	0.623954	0.61561	0.673143	0.762533	0.665542			0.75763	0.112698
9.0274	0.759289	0.739752	0.821691	1.08298	0.758446	0.704344	0.856847	0.771547	0.797912	0.653486	0.621184	0.681819	0.766906	0.684654			0.764347	0.112582
9.2373	0.733077	0.756638	0.840202	1.08191	0.769409	0.704662	0.848248	0.809656	0.787765	0.642473	0.622147	0.687261	0.73459	0.675289			0.763809	0.114588
9.4472	0.746708	0.747404	0.856064	1.08375	0.772751	0.707203	0.844838	0.844216	0.797745	0.630843	0.629688	0.672361	0.762311	0.664014			0.768564	0.118509
9.6572	0.749877	0.736857	0.847605	1.08855	0.784448	0.69473	0.842486	0.835737	0.799114	0.626825	0.611228	0.697249	0.778339	0.689759			0.7702	0.118583
9.8671	0.738179	0.741699	0.86095	1.09362	0.791383	0.728802	0.847475	0.813548	0.804494	0.66115	0.61634	0.698581	0.781308	0.693013			0.776467	0.115055
10.077	0.742233	0.741057	0.862622	1.06586	0.782502	0.745848	0.860369	0.806165	0.804301	0.650309	0.617595	0.694317	0.782731	0.67921			0.773937	0.111141
10.287	0.747189	0.756496	0.852209	1.09044	0.785226	0.73773	0.861006	0.803772	0.845701	0.668559	0.651557	0.704223	0.7773	0.699674			0.784363	0.110009
10.4969	0.760752	0.745894	0.871643	1.11619	0.800464	0.759905	0.874774	0.837248	0.873163	0.668298	0.633596	0.701292	0.799168	0.70026			0.795903	0.120259
10.7069	0.745041	0.757951	0.865593	1.14549	0.789863	0.761556	0.87861	0.811066	0.864375	0.662629	0.636899	0.72011	0.77807	0.693636			0.793635	0.125135
10.9168	0.749226	0.763282	0.846311	1.11296	0.784489	0.758637	0.879717	0.835532	0.851242	0.661779	0.631354	0.716611	0.802147	0.677838			0.790795	0.119116
11.1267	0.753776	0.772175	0.864394	1.0732	0.803046	0.788779	0.891552	0.830587	0.857073	0.687558	0.655072	0.707778	0.825255	0.693732			0.800284	0.106874
11.3367	0.7631	0.782414	0.84329	1.10796	0.839744	0.812599	0.907519	0.818658	0.863306	0.666346	0.654227	0.724372	0.801241	0.695918			0.805764	0.114771
11.5466	0.760542	0.776077	0.867242	1.12286	0.817246	0.810419	0.891313	0.833853	0.852796	0.675652	0.673043	0.721702	0.812781	0.680192			0.806837	0.116071
11.7566	0.751191	0.769257	0.859407	1.11026	0.820319	0.83406	0.87864	0.821212	0.831372	0.664793	0.686952	0.729953	0.809366	0.688997			0.803984	0.111101
11.9665	0.773931	0.747405	0.832967	1.1235	0.811839	0.853705	0.875362	0.835792	0.821672	0.67543	0.675813	0.730953	0.810971	0.684007			0.80381	0.113923
12.1764	0.761332	0.7521	0.856475	1.15995	0.815784	0.856969	0.893987	0.838047	0.822081	0.659372	0.692558	0.727288	0.821041	0.678827			0.809701	0.124413
12.3864	0.754352	0.76672	0.858169	1.08535	0.79685	0.874928	0.892164	0.874292	0.877581	0.666421	0.674359	0.733308	0.821159	0.680942			0.811185	0.112525
12.5963	0.771603	0.783367	0.859414	1.0944	0.826115	0.866562	0.891551	0.851519	0.887772	0.674353	0.694343	0.734936	0.831602	0.683425			0.817926	0.109688
12.8062	0.758371	0.766977	0.854057	1.07069	0.815311	0.872035	0.870725	0.889853	0.854994	0.674361	0.69073	0.745428	0.834221	0.683092			0.812918	0.105155
13.0162	0.784465	0.768583	0.866472	1.04729	0.817665	0.855742	0.887238	0.87191	0.854214	0.663599	0.689097	0.771933	0.840153	0.682214			0.814327	0.100094
13.2261	0.7773	0.771492	0.884748	1.02917	0.814608	0.866947	0.912287	0.871771	0.85892	0.684502	0.688459	0.77161	0.85246	0.696266			0.820039	0.0966492
13.4361	0.791896	0.759819	0.888704	1.02751	0.837509	0.871812	0.876796	0.887959	0.856272	0.701514	0.698988	0.771309	0.805692	0.697713			0.819535	0.0922174
13.646	0.794836	0.756869	0.885744	1.05957	0.822625	0.845012	0.90174	0.918131	0.827757	0.727996	0.72511	0.785098	0.806167	0.701451			0.825579	0.0943949
13.8559	0.787133	0.762349	0.893806	1.09064	0.825243	0.885107	0.91271	0.849875	0.826415	0.722755	0.70771	0.789681	0.844905	0.700284			0.828472	0.10146
14.0659	0.767771	0.743257	0.900946	1.0781	0.806972	0.878441	0.88474	0.879717	0.799738	0.697146	0.709862	0.784736	0.798051	0.700289			0.816412	0.102521
14.2758	0.784674	0.748581	0.889937	1.08921	0.824582	0.861674	0.873316	0.856059	0.850466	0.720793	0.721152	0.757233	0.833164	0.709551			0.822885	0.0985865
14.4858	0.7962	0.755943	0.877024	1.09553	0.8453	0.881794	0.870122	0.903963	0.856024	0.7266	0.704425	0.780432	0.836973	0.698719			0.830646	0.102362
14.6957	0.781014	0.747059	0.885572	1.0722	0.844215	0.901863	0.883736	0.895271	0.876413	0.723667	0.735441	0.757682	0.837104	0.723755			0.833214	0.0970203
14.9056	0.77732	0.755183	0.887552	1.04901	0.83136	0.889176	0.889451	0.894705	0.864481	0.736038	0.722391	0.785268	0.8454	0.716666			0.831714	0.0909413
15.1156	0.795443	0.763043	0.881893	1.10653	0.836762	0.899012	0.883752	0.915067	0.86683	0.748951	0.739679	0.784194	0.841667	0.718304			0.841509	0.0995035
15.3255	0.799847	0.766271	0.877784	1.10843	0.825545	0.882318	0.865666	0.962449	0.857148	0.749171	0.739285	0.805148	0.816128	0.727545			0.841624	0.100485
15.5354	0.807476	0.76076	0.905086	1.12284	0.840477	0.893285	0.855371	0.924893	0.897196	0.733564	0.747881	0.79147	0.813089	0.725494			0.844206	0.104102
15.7454	0.812487	0.747403	0.898107	1.1298	0.832217	0.910059	0.871801	0.93671	0.912114	0.737009	0.760471	0.773518	0.819803	0.728386			0.847849	0.107625
15.9553	0.794546	0.766891	0.896536	1.1103	0.837882	0.907439	0.866335	0.864501	0.902291	0.754647	0.755964	0.770504	0.838748	0.727527			0.842437	0.0981135
16.1653	0.780422	0.761996	0.892931	1.1121	0.835541	0.914563	0.876642	0.889814	0.881982	0.751971	0.766414	0.777084	0.794592	0.746372			0.841602	0.0982755
16.3752	0.799482	0.775435	0.902387	1.12156	0.85923	0.924953	0.878285	0.878792	0.897365	0.736109	0.779458	0.783911	0.805111	0.717119			0.847086	0.102299
16.5851	0.791041	0.759987	0.913234	1.10986	0.8549	0.906446	0.881865	0.918017	0.883594	0.755329	0.759416	0.771555	0.809972	0.731721			0.84621	0.100689
16.7951	0.770866	0.763688	0.888653	1.11168	0.845828	0.919555	0.933526	0.936041	0.883698	0.734891	0.75695	0.792055	0.814244	0.709785			0.847247	0.107471
17.005	0.776786	0.75678	0.922787	1.14296	0.848572	0.921385	0.896188	0.946844	0.887272	0.740415	0.774919	0.81217	0.828593	0.731003			0.856191	0.109661
17.215	0.78238	0.754891	0.909639	1.13979	0.852363	0.919761	0.911142	0.923518	0.872973	0.750891	0.768309	0.78102	0.833097	0.720319			0.851435	0.108849
17.4249	0.785631	0.766145	0.902103	1.1387	0.850176	0.956578	0.884291	0.920981	0.882604	0.750212	0.771847	0.783399	0.812507	0.731516			0.852621	0.108032
17.6348	0.781208	0.768015	0.898317	1.11509	0.869467	0.958525	0.891556	0.924903	0.902581	0.75908	0.763871	0.79395	0.79811	0.742215			0.854778	0.103454
17.8448	0.784191	0.772255	0.92606	1.15781	0.885164	0.96076	0.903341	0.887468	0.906863	0.795706	0.779455	0.791786	0.81653	0.73672			0.864579	0.108905
18.0547	0.778286	0.745752	0.923913	1.15465	0.873982	0.977518	0.890428	0.896441	0.90413	0.753655	0.788293	0.768841	0.821274	0.76521			0.860169	0.112348
18.2646	0.773417	0.750756	0.930688	1.17085	0.88179	0.99125	0.905144	0.883997	0.898024	0.74817	0.778283	0.778677	0.816221	0.752742			0.861429	0.118323
18.4746	0.755892	0.724205	0.914989	1.11855	0.873468	1.00322	0.903423	0.891186	0.927361	0.760114	0.774912	0.774138	0.813562	0.765317			0.857167	0.11192
18.6845	0.75808	0.745332	0.923012	1.12572	0.863768	1.00059	0.923795	0.865029	0.911364	0.761751	0.770998	0.806528	0.822904	0.749021			0.859135	0.110503
18.8945	0.750517	0.730534	0.926071	1.13893	0.868334	1.00327	0.913161	0.890047	0.896568	0.762751	0.782062	0.795684	0.82535	0.75011			0.859528	0.114192
19.1044	0.759321	0.764995	0.897645	1.11693	0.863292	0.990921	0.887056	0.866792	0.906507	0.772646	0.781364	0.784683	0.824737	0.755507			0.855171	0.103034
19.3143	0.773024	0.745757	0.913128	1.1235	0.873312	0.983513	0.87605	0.906477	0.872411	0.756613	0.801115	0.793536	0.851288	0.74627			0.858285	0.104667
19.5243	0.785504	0.746715	0.886695	1.12685	0.852889	0.998389	0.865381	0.936994	0.893193	0.783357	0.801323	0.785807	0.855117	0.742632			0.861489	0.105668
19.7342	0.762544	0.744482	0.909127	1.16634	0.881946	0.985967	0.867796	0.888864	0.902677	0.777461	0.797791	0.787704	0.834773	0.739705			0.860513	0.114077
19.9442	0.739475	0.745742	0.899961	1.15989	0.866104	1.02525	0.909947	0.931004	0.88665	0.767783	0.80217	0.809702	0.811586	0.737414			0.863763	0.119697
20.1541	0.755353	0.734532	0.87845	1.12902	0.86129	0.964045	0.885481	0.908485	0.876266	0.765749	0.783566	0.778581	0.865126	0.748331			0.852448	0.106175
20.364	0.758981	0.741895	0.892727	1.138	0.862977	0.979371	0.913201	0.942254	0.900819	0.777627	0.787584	0.774196	0.844034	0.76245			0.86258	0.10993
20.574	0.73555	0.736647	0.914961	1.19379	0.872996	0.994099	0.886434	0.930698	0.901648	0.760063	0.783773	0.791846	0.851924	0.75624			0.865048	0.124542
20.7839	0.734952	0.745319	0.891787	1.15421	0.858838	0.986622	0.885401	0.970496	0.888109	0.765842	0.784916	0.816112	0.828461	0.758058			0.86208	0.115623
20.9938	0.732036	0.722761	0.89846	1.1619	0.86984	0.95291	0.895648	0.940962	0.891086	0.750022	0.81075	0.795846	0.824312	0.746551			0.856649	0.117006
21.2038	0.738241	0.746338	0.908878	1.21855	0.902131	0.983418	0.897464	0.912387	0.883692	0.779326	0.808281	0.811693	0.830701	0.734063			0.868226	0.126399
21.4137	0.73079	0.730753	0.890315	1.20815	0.875864	0.972692	0.88698	0.900141	0.866575	0.772509	0.809256	0.811807	0.823307	0.739377			0.858465	0.12381
21.6237	0.727098	0.734185	0.889315	1.28251	0.847484	0.963088	0.902779	0.907501	0.897406	0.74673	0.822669	0.785029	0.820377	0.763954			0.86358	0.141311
21.8336	0.728119	0.74889	0.891879	1.32486	0.875792	0.958643	0.896672	0.888832	0.882195	0.75726	0.79037	0.791099	0.819929	0.756418			0.865068	0.149775
22.0435	0.72604	0.728405	0.887168	1.45672	0.87371	0.979882	0.922364	0.884522	0.90401	0.753953	0.796729	0.799247	0.817732	0.749568			0.877146	0.184363
22.2535	0.729581	0.714893	0.883481	1.56645	0.880735	0.959343	0.89573	0.888431	0.895781	0.741703	0.807151	0.79764	0.824062	0.746362			0.88081	0.211255
22.4634	0.735931	0.722251	0.895009	1.56437	0.908835	0.93851	0.887531	0.946936	0.883488	0.753482	0.834091	0.774512	0.803733	0.748337			0.885501	0.210312
22.6734	0.716644	0.737766	0.903563	1.65697	0.910115	0.928769	0.89825	0.930804	0.920408	0.749051	0.811203	0.782966	0.787561	0.755687			0.892126	0.234065
22.8833	0.73472	0.720595	0.865847	1.64387	0.898634	0.937973	0.86891	0.893139	0.878314	0.738477	0.813565	0.766463	0.793275	0.75324			0.879073	0.231239
23.0932	0.725898	0.726745	0.887017	1.55264	0.896164	0.944889	0.860456	0.910146	0.887401	0.748593	0.817191	0.807089	0.765184	0.762427			0.877989	0.207369
23.3032	0.709632	0.727534	0.892459	1.56649	0.873884	0.9727	0.902918	0.931154	0.911368	0.744388	0.817962	0.77485	0.774732	0.751346			0.882244	0.214352
23.5131	0.714933	0.718881	0.885318	1.58249	0.878663	0.958088	0.878274	0.916868	0.92075	0.73492	0.816706	0.772181	0.803727	0.736653			0.879889	0.218191
23.723	0.718603	0.716891	0.87626	1.59103	0.863227	1.00408	0.890438	0.939247	0.903679	0.733425	0.806085	0.78866	0.788732	0.743884			0.88316	0.221897
23.933	0.705249	0.747485	0.895706	1.5696	0.883069	0.982807	0.878586	0.919327	0.887211	0.72184	0.811155	0.75625	0.782129	0.755607			0.878287	0.215933
24.1429	0.713365	0.747998	0.879383	1.51584	0.887187	0.965621	0.891017	0.892724	0.883382	0.717089	0.820996	0.740905	0.787378	0.761309			0.871728	0.201578
24.3529	0.71713	0.746056	0.869615	1.52836	0.88746	0.982827	0.866416	0.911618	0.8713	0.717437	0.824141	0.777181	0.817153	0.744336			0.875788	0.203632
24.5628	0.707319	0.742016	0.877017	1.53938	0.876205	0.947001	0.890789	0.883101	0.890979	0.718662	0.813088	0.75601	0.811916	0.749713			0.871657	0.206605
24.7727	0.69848	0.731122	0.864359	1.49574	0.868272	0.973576	0.910473	0.899273	0.895503	0.725125	0.837839	0.769424	0.809634	0.739784			0.872757	0.197445
24.9827	0.694991	0.721649	0.873052	1.50872	0.872723	0.969447	0.890642	0.920199	0.913183	0.727644	0.830162	0.758181	0.788779	0.74228			0.872261	0.202391
25.1926	0.685332	0.721833	0.877829	1.50167	0.875262	0.972533	0.907649	0.907344	0.883716	0.727228	0.83103	0.808188	0.78537	0.746283			0.873662	0.199358
25.4026	0.687521	0.732842	0.908591	1.47976	0.89565	0.992608	0.895336	0.944481	0.908209	0.71538	0.862152	0.811871	0.755292	0.740603			0.880735	0.196974
25.6125	0.690672	0.755114	0.894048	1.43375	0.876249	0.982272	0.920784	0.921908	0.901784	0.711975	0.843051	0.790363	0.784407	0.743418			0.874985	0.183496
25.8224	0.67357	0.746307	0.879486	1.40963	0.885239	0.956007	0.903275	0.924298	0.894655	0.730749	0.856907	0.787376	0.784049	0.739403			0.869354	0.177221
26.0324	0.689348	0.737979	0.880075	1.43037	0.873758	0.956263	0.938268	0.939542	0.866743	0.699365	0.838342	0.793672	0.796848	0.717447			0.86843	0.185156
26.2423	0.693671	0.740504	0.894841	1.36861	0.883846	0.976753	0.913801	0.944874	0.894906	0.699878	0.864276	0.764337	0.832855	0.743281			0.872602	0.169684
26.4523	0.689709	0.735089	0.874373	1.37557	0.902464	0.943411	0.888567	0.918722	0.882855	0.695762	0.836515	0.78905	0.809213	0.737279			0.862756	0.169674
26.6622	0.682568	0.730459	0.896933	1.35783	0.909327	0.942754	0.906512	0.946724	0.903527	0.702478	0.85355	0.819848	0.79816	0.735009			0.870406	0.167038
26.8721	0.685611	0.73355	0.89202	1.34301	0.904488	0.972471	0.922287	0.947583	0.89096	0.681284	0.835068	0.790472	0.803397	0.734559			0.866911	0.167224
27.0821	0.682352	0.754349	0.898607	1.32112	0.901008	0.951249	0.88984	0.987429	0.9216	0.674857	0.826375	0.789474	0.782457	0.743441			0.866011	0.163437
27.292	0.696798	0.746931	0.890506	1.33812	0.893088	0.966094	0.890987	0.985171	0.889584	0.696377	0.845338	0.771477	0.789367	0.721533			0.865812	0.165789
27.5019	0.690979	0.764016	0.884202	1.3275	0.894808	0.96933	0.881263	0.960261	0.941979	0.687149	0.824455	0.76386	0.778604	0.723569			0.863712	0.164724
27.7119	0.697563	0.759236	0.876374	1.32435	0.869703	0.963746	0.889674	0.97693	0.918645	0.685523	0.840027	0.794539	0.786854	0.738627			0.865842	0.160769
27.9218	0.71202	0.752136	0.902405	1.35453	0.869117	0.980057	0.867163	0.972955	0.934132	0.690917	0.832501	0.78335	0.811014	0.740953			0.871661	0.167006
28.1318	0.688581	0.749575	0.892405	1.33805	0.856065	0.970022	0.857373	0.995151	0.927718	0.690581	0.823115	0.776388	0.813435	0.730842			0.86495	0.166803
28.3417	0.68822	0.756661	0.881471	1.30265	0.864306	0.975804	0.867298	0.972111	0.912418	0.704988	0.836516	0.764824	0.77912	0.717099			0.85882	0.158349
28.5516	0.701334	0.776511	0.882706	1.37454	0.889577	0.977261	0.839774	1.00199	0.918498	0.699574	0.840785	0.746275	0.789984	0.726237			0.868932	0.174697
28.7616	0.697841	0.768907	0.885385	1.25838	0.891033	0.978383	0.846694	0.95982	0.929956	0.709668	0.823096	0.767069	0.801927	0.7261			0.860304	0.146197
28.9715	0.687508	0.759318	0.903958	1.24486	0.877189	1.00177	0.855957	0.994454	0.902816	0.690035	0.844841	0.751963	0.804666	0.721802			0.860081	0.150182
29.1815	0.694137	0.790092	0.920956	1.2083	0.905821	1.01526	0.875139	1.00693	0.918902	0.69038	0.861848	0.775689	0.783954	0.730497			0.86985	0.143043
29.3914	0.704494	0.787562	0.916959	1.2587	0.854105	1.01017	0.861824	0.991424	0.935381	0.685627	0.852616	0.772412	0.787913	0.737554			0.868339	0.150519
29.6013	0.699127	0.790073	0.915852	1.14833	0.867936	0.98854	0.8509	1.0064	0.939906	0.69522	0.848693	0.791389	0.785611	0.730299			0.861306	0.12885
29.8113	0.720776	0.769605	0.928962	1.15694	0.861073	0.986821	0.858788	1.00771	0.957723	0.685128	0.839901	0.773311	0.763971	0.702464			0.858084	0.135994
30.0212	0.721273	0.780462	0.924011	1.18804	0.865111	1.00356	0.843711	0.94489	0.94436	0.694484	0.833468	0.763018	0.793763	0.727156			0.859093	0.133598
30.2311	0.709725	0.789816	0.928092	1.10506	0.860155	1.00934	0.850239	0.950134	0.935053	0.691559	0.8608	0.786435	0.770964	0.724712			0.855149	0.120269
30.4411	0.706905	0.793235	0.933041	1.1251	0.857636	0.998148	0.845476	0.932681	0.980884	0.703376	0.843257	0.771422	0.775846	0.732017			0.857073	0.123632
30.651	0.709375	0.77379	0.954934	1.09636	0.87789	1.01977	0.838667	0.950002	0.969204	0.722491	0.832109	0.76438	0.798263	0.714596			0.858702	0.122502
30.861	0.718819	0.776307	0.923235	1.07116	0.889388	1.0382	0.856626	0.979256	0.964279	0.703179	0.812766	0.773056	0.772824	0.71968			0.857056	0.122412
31.0709	0.7058	0.798833	0.911174	1.0972	0.870311	1.01957	0.871901	0.965273	0.954468	0.715194	0.814847	0.781927	0.785802	0.701569			0.856705	0.121426
31.2808	0.71037	0.784219	0.920966	1.12896	0.882227	0.995293	0.843187	0.978625	0.952337	0.692643	0.842011	0.77737	0.77753	0.697647			0.855956	0.12829

## Sheet: MCC Partial Dynap
	Partial 1	Partial 2	Partial 3	Partial 4	Partial 5	Partial 6	Partial 7	Partial 8	Partial 9					average	stdev
0	1.01569	1.01569	1.0259	1.02134	1.01404	0.954622	1.00574	1.02716	0.995954					1.00846	0.0224109
0.201	0.984007	0.984007	0.974107	0.978	0.985688	1.04775	0.99415	0.972637	1.00404					0.991598	0.0232244
0.4019	0	0	0	0	0	0	0	0	0					0	0
0.6029	0.152088	0.152088	0.121826	0.070765	0.121204	0.057538	0.01964	0.109215	0.146857					0.105691	0.0467129
0.8039	0.266859	0.266859	0.204819	0.149601	0.213992	0.216266	0.130367	0.192219	0.21882					0.206645	0.0458667
1.0048	0.369512	0.369512	0.301284	0.181264	0.284753	0.305977	0.142011	0.26297	0.260329					0.27529	0.0761924
1.2058	0.429459	0.429459	0.352518	0.24976	0.340955	0.35594	0.236926	0.335854	0.308775					0.337738	0.0672042
1.4068	0.456153	0.456153	0.418301	0.27856	0.378088	0.384479	0.270346	0.363203	0.376121					0.375712	0.0666474
1.6078	0.50473	0.50473	0.418766	0.331327	0.41873	0.414204	0.29483	0.412153	0.423114					0.41362	0.0685843
1.8087	0.560146	0.560146	0.458267	0.384278	0.465737	0.498275	0.328646	0.433967	0.469019					0.462053	0.0752231
2.0097	0.623357	0.623357	0.527628	0.40407	0.491354	0.572357	0.339073	0.482887	0.508925					0.508112	0.0944642
2.2107	0.666988	0.666988	0.594933	0.421719	0.537362	0.577193	0.328016	0.483582	0.519425					0.532912	0.111098
2.4116	0.673465	0.673465	0.599141	0.426337	0.538666	0.565545	0.379776	0.532086	0.522098					0.54562	0.0990377
2.6126	0.73314	0.73314	0.637749	0.469666	0.565823	0.534095	0.389514	0.570176	0.537921					0.57458	0.113252
2.8136	0.796313	0.796313	0.645907	0.503963	0.566086	0.555856	0.440846	0.549004	0.621					0.608365	0.122091
3.0145	0.74632	0.74632	0.639763	0.50409	0.576596	0.575213	0.415118	0.570973	0.630465					0.60054	0.106484
3.2155	0.809395	0.809395	0.674594	0.538367	0.601877	0.604682	0.441064	0.54049	0.62549					0.627262	0.122395
3.4165	0.820094	0.820094	0.71544	0.544798	0.626678	0.606451	0.435013	0.581529	0.654609					0.644967	0.125676
3.6175	0.769881	0.769881	0.759222	0.574225	0.65873	0.662185	0.511118	0.590227	0.664486					0.662217	0.0924435
3.8184	0.764828	0.764828	0.733016	0.569572	0.652343	0.720252	0.492661	0.616124	0.703006					0.668514	0.0937415
4.0194	0.764297	0.764297	0.744636	0.577703	0.672527	0.774901	0.468063	0.612684	0.674391					0.672611	0.104227
4.2204	0.761331	0.761331	0.770385	0.562325	0.665461	0.784971	0.505118	0.63044	0.726198					0.685284	0.100871
4.4213	0.776226	0.776226	0.777056	0.552833	0.669032	0.758387	0.511482	0.689573	0.729995					0.693423	0.0998391
4.6223	0.746908	0.746908	0.775523	0.585887	0.681901	0.72142	0.533	0.660056	0.744619					0.688469	0.0823038
4.8233	0.743184	0.743184	0.821934	0.567057	0.721067	0.798896	0.575344	0.697042	0.732114					0.711091	0.0880112
5.0242	0.81837	0.81837	0.790266	0.58675	0.722794	0.752411	0.599546	0.690875	0.73764					0.724114	0.0856014
5.2252	0.795196	0.795196	0.775972	0.561315	0.728189	0.817325	0.638691	0.705119	0.754649					0.730184	0.0838613
5.4262	0.869028	0.869028	0.782282	0.585117	0.745139	0.840794	0.658908	0.717519	0.777756					0.760619	0.0961375
5.6271	0.892967	0.892967	0.819992	0.574365	0.754884	0.79398	0.715736	0.724629	0.767841					0.770818	0.0979919
5.8281	0.843607	0.843607	0.804566	0.596214	0.750072	0.810014	0.712366	0.761593	0.772738					0.766086	0.0770492
6.0291	0.829121	0.829121	0.809156	0.61394	0.743484	0.819122	0.671861	0.754779	0.821654					0.765804	0.0777554
6.2301	0.833691	0.833691	0.789514	0.602863	0.741001	0.786452	0.73424	0.763922	0.81812					0.767055	0.0716707
6.431	0.836151	0.836151	0.851023	0.626063	0.755811	0.834724	0.727177	0.776466	0.804601					0.78313	0.0724106
6.632	0.831553	0.831553	0.871858	0.615499	0.759919	0.820811	0.699453	0.749141	0.819321					0.777679	0.0804832
6.833	0.827217	0.827217	0.834271	0.612573	0.76484	0.858731	0.635308	0.743065	0.814681					0.768656	0.0895886
7.0339	0.783845	0.783845	0.829464	0.602884	0.728559	0.835651	0.643288	0.789924	0.797661					0.755013	0.0814487
7.2349	0.829624	0.829624	0.830666	0.616032	0.715223	0.806628	0.691414	0.744345	0.823889					0.765272	0.077762
7.4359	0.862744	0.862744	0.830827	0.621978	0.727029	0.797157	0.724973	0.773812	0.80762					0.778765	0.0775912
7.6368	0.950748	0.950748	0.838627	0.639238	0.763372	0.783545	0.721896	0.795444	0.808443					0.805785	0.100181
7.8378	0.925231	0.925231	0.849708	0.663823	0.766491	0.821818	0.662494	0.770433	0.900404					0.809515	0.101875
8.0388	0.922214	0.922214	0.825574	0.680486	0.747409	0.739961	0.705649	0.77219	0.86181					0.797501	0.0898752
8.2398	0.936051	0.936051	0.867207	0.665225	0.748595	0.789509	0.706634	0.783979	0.860748					0.810444	0.0962651
8.4407	0.921741	0.921741	0.883636	0.650795	0.734876	0.730751	0.665222	0.761269	0.89392					0.795995	0.109703
8.6417	0.94466	0.94466	0.843978	0.640451	0.793512	0.761746	0.685749	0.793528	0.886619					0.810545	0.10627
8.8427	0.914885	0.914885	0.868723	0.689709	0.791313	0.809603	0.706768	0.790767	0.878311					0.818329	0.0831701
9.0436	0.909202	0.909202	0.858605	0.683317	0.796718	0.724201	0.695693	0.787869	0.869652					0.803829	0.0883193
9.2446	0.946615	0.946615	0.87474	0.652332	0.811043	0.742095	0.697719	0.782975	0.836937					0.810119	0.10311
9.4456	1.02105	1.02105	0.871466	0.676638	0.827723	0.728696	0.705593	0.812481	0.87061					0.837257	0.125234
9.6465	1.05119	1.05119	0.899239	0.685454	0.814005	0.748394	0.730635	0.832665	0.937456					0.861136	0.13377
9.8475	1.06271	1.06271	0.87608	0.696816	0.796349	0.748264	0.716969	0.819743	0.923614					0.855917	0.137651
10.0485	1.05193	1.05193	0.884681	0.680677	0.808933	0.724227	0.739735	0.804405	0.897445					0.849329	0.134822
10.2495	1.12536	1.12536	0.88368	0.684662	0.80652	0.804832	0.70318	0.810204	0.900998					0.871645	0.160303
10.4504	1.05313	1.05313	0.89648	0.698686	0.812939	0.708266	0.67972	0.831078	0.966926					0.855596	0.146539
10.6514	1.03037	1.03037	0.854279	0.68023	0.798257	0.77814	0.665521	0.828171	0.88748					0.839203	0.130678
10.8524	1.01329	1.01329	0.854134	0.691255	0.804601	0.777933	0.657189	0.825076	0.846323					0.831454	0.122736
11.0533	1.02866	1.02866	0.885787	0.72333	0.778728	0.734349	0.675685	0.806218	0.880451					0.837984	0.128231
11.2543	1.02859	1.02859	0.874536	0.686216	0.806309	0.750882	0.753724	0.82025	0.918038					0.851904	0.121295
11.4553	0.978279	0.978279	0.825358	0.692627	0.809749	0.739896	0.693642	0.81011	0.918497					0.827382	0.110767
11.6562	0.986987	0.986987	0.84259	0.660531	0.79624	0.713488	0.727844	0.814194	0.913267					0.826903	0.117482
11.8572	1.00786	1.00786	0.826012	0.709881	0.816232	0.760271	0.698214	0.836518	0.915383					0.842027	0.115199
12.0582	1.01276	1.01276	0.854783	0.706317	0.826964	0.743671	0.703599	0.854069	0.853838					0.840974	0.115228
12.2591	0.996362	0.996362	0.860297	0.692239	0.806918	0.744461	0.699978	0.801236	0.862901					0.828973	0.112863
12.4601	1.0004	1.0004	0.879326	0.670454	0.788996	0.708064	0.722048	0.814595	0.891946					0.830691	0.121569
12.6611	1.01644	1.01644	0.906484	0.709485	0.791206	0.718278	0.703832	0.812253	0.893835					0.840917	0.124054
12.8621	0.941889	0.941889	0.947664	0.735032	0.784623	0.781772	0.728299	0.838908	0.837348					0.837492	0.0882173
13.063	0.946414	0.946414	0.951173	0.668281	0.812379	0.76415	0.707241	0.82182	0.897852					0.83508	0.107294
13.264	0.920945	0.920945	0.902853	0.678901	0.768652	0.744794	0.767083	0.797047	0.869522					0.818971	0.0874756
13.465	0.952634	0.952634	0.925811	0.675041	0.780835	0.743283	0.715752	0.789948	0.895387					0.825703	0.107222
13.6659	1.0114	1.0114	0.951935	0.680986	0.79133	0.757894	0.722251	0.811888	0.888341					0.847492	0.123576
13.8669	0.986065	0.986065	0.919618	0.688949	0.779926	0.768869	0.692886	0.779463	0.874054					0.830655	0.115204
14.0679	0.964792	0.964792	0.940773	0.694899	0.801323	0.756768	0.776504	0.791082	0.881667					0.8414	0.0993241
14.2688	0.941436	0.941436	0.954417	0.707511	0.794895	0.679114	0.77409	0.805063	0.872744					0.830078	0.103013
14.4698	0.971437	0.971437	0.927244	0.711911	0.798825	0.739404	0.74224	0.778971	0.909832					0.839033	0.105199
14.6708	1.05352	1.05352	0.893684	0.710925	0.732745	0.770212	0.772753	0.791007	0.883757					0.851347	0.129796
14.8718	1.04195	1.04195	0.881542	0.686245	0.720712	0.721708	0.68682	0.801915	0.985201					0.840895	0.150479
15.0727	1.12628	1.12628	0.921708	0.696431	0.726126	0.716003	0.712595	0.796008	0.915378					0.859647	0.173178
15.2737	1.1179	1.1179	0.911921	0.679861	0.710924	0.722094	0.722404	0.833859	0.927573					0.860494	0.170879
15.4747	1.07169	1.07169	0.88986	0.688796	0.71094	0.75253	0.772901	0.849574	0.886481					0.854939	0.142196
15.6756	1.00066	1.00066	0.854164	0.702169	0.703857	0.734454	0.755968	0.803501	0.837103					0.821392	0.114989
15.8766	1.05071	1.05071	0.869511	0.651953	0.720441	0.707106	0.732269	0.791492	0.90854					0.831414	0.147892
16.0776	1.04131	1.04131	0.881972	0.654524	0.706781	0.75638	0.734689	0.792443	0.941356					0.838974	0.143862
16.2785	0.984536	0.984536	0.837193	0.691695	0.721868	0.805044	0.719968	0.797562	0.946234					0.832071	0.115048
16.4795	0.942357	0.942357	0.854779	0.68787	0.699439	0.80787	0.734547	0.808381	0.922931					0.822281	0.100795
16.6805	0.947648	0.947648	0.810438	0.677361	0.704818	0.842608	0.724823	0.821141	0.926969					0.822606	0.10443
16.8814	0.928498	0.928498	0.859284	0.682026	0.726845	0.858808	0.72595	0.807717	0.934832					0.828051	0.0974082
17.0824	0.870005	0.870005	0.820759	0.697318	0.698163	0.854818	0.715293	0.829626	0.951353					0.811927	0.0893254
17.2834	0.858823	0.858823	0.863499	0.672833	0.714001	0.842859	0.736845	0.789084	0.854551					0.799035	0.0736815
17.4844	0.921732	0.921732	0.87501	0.663304	0.683949	0.8032	0.744028	0.841796	0.896138					0.816765	0.0993858
17.6853	0.860177	0.860177	0.918257	0.668068	0.695431	0.838468	0.773039	0.750149	0.871381					0.803905	0.0860362
17.8863	0.903185	0.903185	0.872017	0.665441	0.715494	0.829086	0.791588	0.810544	0.864619					0.81724	0.0823535
18.0873	0.844523	0.844523	0.915621	0.716424	0.690123	0.784882	0.768246	0.78819	0.866298					0.802092	0.072563
18.2882	0.888015	0.888015	0.94202	0.710124	0.720167	0.801753	0.774307	0.815297	0.837696					0.81971	0.078211
18.4892	0.904968	0.904968	0.891206	0.691722	0.700648	0.887123	0.733027	0.80626	0.860403					0.820036	0.0895129
18.6902	0.930936	0.930936	0.89989	0.682761	0.666898	0.859368	0.75689	0.805828	0.870585					0.822677	0.100932
18.8911	0.920874	0.920874	0.927243	0.64646	0.697141	0.823708	0.783731	0.805418	0.804734					0.814465	0.099097
19.0921	0.897618	0.897618	0.930398	0.661379	0.695355	0.891973	0.777209	0.844818	0.864627					0.828999	0.0960622
19.2931	0.972225	0.972225	0.940966	0.656717	0.702949	0.946681	0.72255	0.843609	0.854269					0.845799	0.123807
19.4941	0.934271	0.934271	0.930785	0.660677	0.674435	0.882228	0.75109	0.836966	0.860285					0.829445	0.108795
19.695	0.932103	0.932103	0.959507	0.658212	0.671335	0.821989	0.767396	0.801443	0.860793					0.822765	0.110444
19.896	0.896219	0.896219	0.899195	0.663238	0.661693	0.826124	0.755517	0.823867	0.904947					0.814113	0.0991467
20.097	0.849251	0.849251	0.897134	0.661926	0.695293	0.864252	0.754116	0.772548	0.900916					0.804965	0.0875098
20.2979	0.826892	0.826892	0.919685	0.644289	0.677786	0.819024	0.801693	0.779107	0.888181					0.798172	0.0890928
20.4989	0.869432	0.869432	0.901917	0.659995	0.675769	0.809748	0.731309	0.778246	0.899826					0.799519	0.0937505
20.6999	0.871656	0.871656	0.932649	0.655438	0.685373	0.855554	0.757393	0.810968	0.859802					0.811165	0.0931253
20.9008	0.888014	0.888014	0.946165	0.654038	0.659693	0.863046	0.761732	0.784034	0.869744					0.81272	0.104253
21.1018	0.894155	0.894155	0.925758	0.687476	0.664331	0.84953	0.684158	0.8265	0.883986					0.812228	0.104221
21.3028	0.903915	0.903915	0.967136	0.637452	0.661294	0.824671	0.761015	0.802219	0.911709					0.819258	0.115362
21.5037	0.929336	0.929336	0.936032	0.671059	0.650174	0.791487	0.73377	0.812392	0.875475					0.81434	0.111519
21.7047	0.936625	0.936625	0.917082	0.677469	0.684975	0.796318	0.746131	0.775465	0.866883					0.815286	0.103183
21.9057	0.928791	0.928791	0.926853	0.681018	0.669333	0.78526	0.732394	0.816412	0.939389					0.823138	0.111895
22.1067	0.895763	0.895763	0.936158	0.649945	0.689075	0.834694	0.742828	0.777652	0.885276					0.811906	0.101654
22.3076	0.976556	0.976556	0.948271	0.660859	0.656671	0.809009	0.753547	0.775183	0.882654					0.82659	0.126271
22.5086	0.956418	0.956418	0.954812	0.652708	0.63968	0.885734	0.741801	0.801105	0.911314					0.833332	0.129145
22.7096	0.974286	0.974286	0.970959	0.660413	0.6572	0.907305	0.746308	0.780046	0.901073					0.84132	0.132051
22.9105	0.987355	0.987355	0.909373	0.655256	0.649121	0.930772	0.79753	0.788993	0.92585					0.847956	0.131458
23.1115	1.00211	1.00211	0.938477	0.629939	0.642599	0.910842	0.703598	0.777922	0.886717					0.832702	0.147704
23.3125	0.958138	0.958138	0.938954	0.651467	0.642833	0.870144	0.687219	0.772208	0.913797					0.821433	0.133844
23.5134	0.924168	0.924168	0.914041	0.652082	0.655587	0.842497	0.758933	0.835866	0.88422					0.821285	0.108611
23.7144	0.956906	0.956906	0.982946	0.644194	0.619127	0.873676	0.768739	0.838467	0.936715					0.841964	0.137125
23.9154	0.960054	0.960054	0.965451	0.630051	0.617309	0.825915	0.788841	0.830743	0.876885					0.828367	0.13289
24.1164	0.930626	0.930626	0.933373	0.655	0.620711	0.846259	0.801225	0.827676	0.866992					0.82361	0.1159
24.3173	0.88533	0.88533	0.916229	0.64109	0.641375	0.812792	0.702522	0.785915	0.880878					0.794607	0.10876
24.5183	0.814617	0.814617	0.931704	0.634744	0.631793	0.809368	0.76012	0.818215	0.865109					0.786699	0.0987631
24.7193	0.826789	0.826789	0.905511	0.622022	0.620408	0.839332	0.749662	0.798601	0.835001					0.780457	0.0989747
24.9202	0.857567	0.857567	0.935628	0.651227	0.615409	0.843322	0.822308	0.73313	0.895056					0.801246	0.110169
25.1212	0.910991	0.910991	0.953091	0.620192	0.630705	0.811211	0.77674	0.780056	0.868903					0.806987	0.119603
25.3222	0.911011	0.911011	0.982176	0.653644	0.637737	0.786988	0.75833	0.790226	0.85795					0.809897	0.117294
25.5231	0.870198	0.870198	0.96508	0.646632	0.637006	0.853044	0.796104	0.770598	0.841389					0.805583	0.107425
25.7241	0.882518	0.882518	0.960611	0.661557	0.680268	0.821164	0.740596	0.798256	0.847144					0.808292	0.0990581
25.9251	0.915722	0.915722	0.975766	0.625916	0.651619	0.79745	0.783955	0.764898	0.882705					0.812639	0.120881
26.1261	0.952376	0.952376	0.962095	0.64966	0.629378	0.784808	0.816084	0.81524	0.858433					0.824494	0.124078
26.327	0.88248	0.88248	0.958481	0.650908	0.595177	0.772523	0.838488	0.777081	0.885975					0.804844	0.118767
26.528	0.915923	0.915923	0.985465	0.662668	0.580183	0.71462	0.757897	0.791178	0.82292					0.794086	0.131246
26.729	0.954262	0.954262	0.972891	0.61743	0.593536	0.820523	0.736738	0.786806	0.896234					0.814742	0.143765
26.9299	0.940127	0.940127	0.944562	0.635436	0.555471	0.75708	0.727752	0.765462	0.892466					0.795387	0.143029
27.1309	0.903237	0.903237	0.964057	0.635699	0.559736	0.753557	0.721242	0.771971	0.926559					0.793255	0.140404
27.3319	0.884738	0.884738	0.961566	0.631493	0.544333	0.724562	0.703935	0.823402	0.976161					0.79277	0.150106
27.5328	0.875474	0.875474	0.930022	0.637529	0.512187	0.719088	0.685041	0.81482	0.900732					0.772263	0.141746
27.7338	0.864352	0.864352	0.927899	0.622291	0.531988	0.780729	0.686822	0.797505	0.844031					0.768885	0.129646
27.9348	0.810516	0.810516	0.913612	0.645806	0.534633	0.774342	0.718787	0.829512	0.878037					0.768418	0.118618
28.1357	0.849043	0.849043	0.936586	0.660722	0.526618	0.720269	0.682295	0.786135	0.87067					0.764598	0.128316
28.3367	0.854863	0.854863	0.887328	0.636337	0.563104	0.766787	0.68742	0.77342	0.898995					0.769235	0.118489
28.5377	0.828455	0.828455	0.888509	0.615361	0.537479	0.77713	0.672864	0.734076	0.863328					0.749517	0.119671
28.7387	0.79734	0.79734	0.883207	0.637302	0.548522	0.752853	0.637373	0.754186	0.899504					0.745292	0.117464
28.9396	0.831057	0.831057	0.849335	0.626312	0.527137	0.766239	0.70398	0.735624	0.88575					0.750721	0.116719
29.1406	0.822546	0.822546	0.862999	0.579674	0.536016	0.769515	0.648002	0.746062	0.895242					0.742511	0.127223
29.3416	0.83958	0.83958	0.840067	0.634202	0.563753	0.806898	0.685652	0.741467	0.883516					0.759413	0.109965
29.5425	0.82963	0.82963	0.871336	0.634585	0.558582	0.77739	0.665839	0.717359	0.894373					0.753192	0.115659
29.7435	0.810978	0.810978	0.883141	0.636121	0.542659	0.861648	0.66476	0.713357	0.8935					0.75746	0.123636
29.9445	0.833067	0.833067	0.863944	0.587858	0.51674	0.803701	0.67546	0.730358	0.905928					0.750014	0.132582
