# Supplementary material for: A liquid-like organelle at the root of motile ciliopathy
Source: eLife. 2018 Dec 18;7:e38497. doi: 10.7554/eLife.38497 (PMC6349401; doi:10.7554/eLife.38497)
Supplement: Figure 8—source data 1. [file elife-38497-fig8-data1.xls]

## Sheet: 2018_2_3_Ktu_cell_analysis.csv
x	Cell number	foci_count	condition
	1	6	wild-type
	2	8	wild-type
	3	13	wild-type
	4	11	wild-type
	5	11	wild-type
	6	9	wild-type
	7	9	wild-type
	8	17	wild-type
	9	14	wild-type
	10	16	wild-type
	11	19	wild-type
	12	12	wild-type
	13	9	wild-type
	14	11	wild-type
	15	15	wild-type
	16	19	wild-type
	17	12	wild-type
	18	10	wild-type
	19	12	wild-type
	20	17	wild-type
	21	15	wild-type
	22	11	wild-type
	23	18	wild-type
	24	17	wild-type
	25	9	wild-type
	1	3	Heatr2-MO
	2	4	Heatr2-MO
	3	4	Heatr2-MO
	4	2	Heatr2-MO
	5	3	Heatr2-MO
	6	4	Heatr2-MO
	7	4	Heatr2-MO
	8	6	Heatr2-MO
	9	4	Heatr2-MO
	10	4	Heatr2-MO
	11	2	Heatr2-MO
	12	4	Heatr2-MO
	13	2	Heatr2-MO
	14	6	Heatr2-MO
	15	4	Heatr2-MO
	16	4	Heatr2-MO
	17	7	Heatr2-MO
	18	9	Heatr2-MO
	19	1	Heatr2-MO
	20	7	Heatr2-MO
	21	0	Heatr2-MO
	22	0	Heatr2-MO
	23	6	Heatr2-MO
	24	16	Heatr2-MO
	25	8	Heatr2-MO
	26	9	Heatr2-MO
