# Supplementary material for: A liquid-like organelle at the root of motile ciliopathy
Source: eLife. 2018 Dec 18;7:e38497. doi: 10.7554/eLife.38497 (PMC6349401; doi:10.7554/eLife.38497)
Supplement: Figure 8—source data 2. [file elife-38497-fig8-data2.xlsx]

## Sheet: Heatr2 MO
Time	MO 1	MO 2	MO 3	MO 4	MO 5	MO 6	MO 7	MO 8	MO 9	MO 10	MO 12	MO 13	MO 14	MO 15	MO 16	MO 17	MO 18	MO 19 (B)	MO 20	MO 21	MO 22	MO 23	MO 24	MO 25	MO 26	MO 27	MO 28	MO 29	MO 30	MO 31	MO 32														Average	Standard Dev
0	1.02792	1.02792	0.996447	1.03245	1.00978	1.00175	0.994995	1.00912	1.00113	0.989268	1.00588	0.996331	0.975042	1.05319	1.03129	0.973849	1.01594	0.978137	1.03677	1.01745	0.99305	1.0248	0.9883	1.00107	1.01467	0.990691	1.02858	0.988838	1.02007	0.994844	0.995302														1.00693	0.0195849
0.2099	1.00473	1.00473	0.990976	0.98758	0.992578	1.02763	1.00409	1.01319	1.00575	1.00366	0.998033	0.995921	1.03347	1.03115	0.991815	1.01476	1.01341	0.977787	1.00725	0.988875	1.02338	0.96043	0.982053	1.00975	0.987883	1.00911	1.02071	1.00713	1.02575	0.970797	0.971324														1.0018	0.0183111
0.4199	0.987948	0.987948	1.02601	0.973274	0.975681	0.995339	0.997688	1.00479	1.00788	1.01629	0.978371	1.00917	1.01179	0.97004	1.01051	0.982498	0.966624	1.01114	1.01969	1.07347	0.981668	1.01277	1.04861	0.998199	1.00541	1.01529	1.00726	1.02175	0.978724	1.0437	1.02686														1.00472	0.0243076
0.6298	0.978037	0.978037	1.0001	1.03089	1.02435	0.950129	1.02278	0.968325	0.980597	0.997681	1.00539	0.989991	0.962726	0.97412	1.00283	1.0223	1.02234	0.985068	0.976125	0.942536	0.988368	1.00894	0.980526	0.991063	1.01108	1.01514	0.971834	0.984249	0.998455	0.98433	1.0069														0.992104	0.022077
0.8398	1.00104	1.00104	0.987104	0.976131	0.997379	1.02733	0.980936	1.00482	1.00496	0.993081	1.01267	1.00861	1.01796	0.97335	0.96305	1.00763	0.982009	1.05103	0.96299	0.982161	1.01464	0.994141	1.00317	0.999623	0.980846	0.970809	0.972981	0.998595	0.976965	1.00779	0.999685														0.995308	0.0194735
1.0497	0	0	0	0	0	0	0	0	0	0	0	0	0	0	0	0	0	0	0	0	0	0	0	0	0	0	0	0	0	0	0														0	0
1.2596	0.088815	0.088815	0.084499	0.100975	0.087614	0.104631	0.134009	0.070488	0.07592	0.04756	0.057577	0.066336	0.063336	0.03322	0.103426	0.054609	0.06023	0.132904	0.18474	0.122208	0.112425	0.132228	0.144195	0.209777	0.07424	0.104231	0.065831	0.11899	0.129639	0.1741	0.108499														0.101163	0.0412219
1.4696	0.158743	0.158743	0.139723	0.096112	0.149892	0.147641	0.195371	0.11485	0.147458	0.080033	0.076294	0.121577	0.119654	0.06999	0.211916	0.0882	0.081422	0.233812	0.222067	0.229822	0.188149	0.210375	0.193967	0.297944	0.121952	0.18217	0.115513	0.212368	0.226773	0.258453	0.21516														0.163424	0.0600027
1.6795	0.207372	0.207372	0.183325	0.145309	0.191347	0.224668	0.268285	0.14054	0.168365	0.107597	0.121957	0.148284	0.168686	0.09777	0.226802	0.119242	0.118866	0.248391	0.257611	0.277603	0.209979	0.224582	0.245685	0.323476	0.160706	0.238694	0.155817	0.253687	0.264079	0.293718	0.261369														0.201974	0.0605389
1.8894	0.241454	0.241454	0.240069	0.191659	0.241832	0.27015	0.29023	0.165719	0.2162	0.12683	0.131806	0.184459	0.199347	0.10745	0.280909	0.148033	0.133728	0.322125	0.310453	0.284859	0.249342	0.251994	0.305446	0.423523	0.206853	0.2618	0.184226	0.297283	0.330231	0.33906	0.303138														0.241344	0.0734558
2.0994	0.271568	0.271568	0.251787	0.209864	0.280673	0.274813	0.345302	0.20103	0.23903	0.139031	0.159863	0.209216	0.236998	0.14029	0.30941	0.186984	0.161583	0.341516	0.360838	0.375132	0.317134	0.316687	0.308763	0.402659	0.241484	0.302402	0.21994	0.316603	0.358287	0.38943	0.346114														0.273742	0.0749325
2.3093	0.262488	0.262488	0.281927	0.21251	0.289722	0.296671	0.337858	0.227934	0.255528	0.169161	0.16844	0.234568	0.278174	0.16167	0.342471	0.192065	0.17038	0.332268	0.358193	0.357212	0.331437	0.302287	0.34205	0.445866	0.270309	0.308181	0.241242	0.342782	0.371938	0.400057	0.351438														0.287075	0.072736
2.5193	0.349718	0.349718	0.310898	0.25425	0.305978	0.332788	0.339129	0.216826	0.297583	0.188912	0.173591	0.247499	0.291826	0.18596	0.41238	0.199616	0.205362	0.373459	0.380239	0.377292	0.33775	0.318106	0.352082	0.445518	0.294955	0.368608	0.27205	0.382915	0.398752	0.429198	0.38498														0.315417	0.0763036
2.7292	0.317327	0.317327	0.282469	0.25705	0.329528	0.361006	0.389308	0.221943	0.284787	0.204745	0.18247	0.235185	0.307843	0.19717	0.390489	0.22755	0.21375	0.409507	0.385327	0.415339	0.350897	0.378269	0.413953	0.447612	0.309737	0.392556	0.288512	0.387771	0.425286	0.449075	0.411114														0.328545	0.0812027
2.9391	0.363	0.363	0.317557	0.27708	0.314312	0.351705	0.438355	0.257206	0.311595	0.202107	0.179782	0.267944	0.298526	0.18949	0.409354	0.242315	0.203019	0.436238	0.392589	0.402314	0.379	0.358157	0.411922	0.427686	0.334089	0.39508	0.287947	0.441758	0.459092	0.443568	0.455907														0.342313	0.0848434
3.1491	0.369492	0.369492	0.354114	0.291302	0.375596	0.388768	0.422357	0.263303	0.340806	0.223058	0.204697	0.258338	0.358103	0.20287	0.455384	0.263987	0.222748	0.427762	0.449767	0.400893	0.380463	0.38185	0.445181	0.467845	0.349309	0.422956	0.317502	0.417369	0.482056	0.493015	0.468815														0.363523	0.0860221
3.359	0.421013	0.421013	0.369302	0.301116	0.350154	0.405363	0.440084	0.293838	0.346936	0.233252	0.230544	0.272837	0.338244	0.22745	0.44789	0.273247	0.256078	0.442496	0.474689	0.358233	0.390729	0.37891	0.408497	0.512988	0.377715	0.417511	0.344799	0.388153	0.483635	0.504052	0.48093														0.373926	0.082653
3.569	0.426309	0.426309	0.389791	0.356506	0.407388	0.406145	0.480604	0.294606	0.348515	0.234558	0.212612	0.28746	0.376774	0.22244	0.388299	0.295903	0.25487	0.461104	0.398989	0.444514	0.437681	0.369955	0.429071	0.518627	0.372206	0.456136	0.337035	0.421875	0.472087	0.469074	0.46981														0.382815	0.0816477
3.7789	0.456199	0.456199	0.378928	0.320272	0.389418	0.40927	0.427707	0.309935	0.363076	0.243142	0.230262	0.299625	0.334721	0.2545	0.452388	0.303767	0.291801	0.460644	0.469889	0.411751	0.454808	0.412933	0.399775	0.518575	0.372935	0.44866	0.348381	0.385821	0.48462	0.470929	0.483231														0.388521	0.078129
3.9888	0.467059	0.467059	0.436595	0.333261	0.405405	0.402663	0.468297	0.348344	0.373772	0.24908	0.25771	0.286739	0.367156	0.2811	0.467264	0.31735	0.295041	0.457719	0.467221	0.389911	0.488984	0.379534	0.428125	0.562659	0.378953	0.435244	0.366985	0.401326	0.478575	0.466007	0.476264														0.400045	0.0772324
4.1988	0.33958	0.33958	0.431289	0.320633	0.409211	0.436595	0.480585	0.360047	0.374616	0.26635	0.24232	0.30351	0.372294	0.24534	0.465209	0.280373	0.283588	0.476348	0.456804	0.378579	0.463721	0.420468	0.476768	0.596577	0.388121	0.454625	0.375207	0.464277	0.470187	0.501849	0.507653														0.399429	0.0869588
4.4087	0.381643	0.381643	0.431066	0.336729	0.412358	0.493376	0.485485	0.352498	0.383167	0.269802	0.24164	0.324784	0.397619	0.28116	0.466482	0.30914	0.289828	0.489355	0.423832	0.351392	0.480809	0.378169	0.444451	0.535801	0.36844	0.466825	0.343234	0.451506	0.474434	0.516412	0.49796														0.401969	0.0794218
4.6186	0.370786	0.370786	0.421793	0.374727	0.429026	0.482574	0.466	0.369396	0.386267	0.259252	0.268421	0.326516	0.407762	0.2823	0.446514	0.303672	0.300316	0.452505	0.439447	0.440742	0.466904	0.425521	0.475272	0.536891	0.391028	0.476629	0.385193	0.410503	0.512304	0.465332	0.53781														0.409103	0.0750265
4.8286	0.435164	0.435164	0.484446	0.391153	0.422047	0.440571	0.482565	0.420793	0.385872	0.268652	0.265611	0.334074	0.415229	0.29076	0.476434	0.305399	0.311847	0.51258	0.467301	0.414107	0.437192	0.439278	0.473331	0.550563	0.403572	0.478541	0.384904	0.441515	0.489378	0.465343	0.521677														0.420808	0.0738916
5.0385	0.453066	0.453066	0.462703	0.443109	0.43614	0.46635	0.510083	0.409932	0.405265	0.278659	0.257815	0.342758	0.429942	0.28172	0.507402	0.297021	0.329069	0.452553	0.451152	0.499206	0.471662	0.391474	0.480065	0.576003	0.381512	0.498874	0.393095	0.418545	0.512395	0.457394	0.525654														0.428183	0.0785424
5.2485	0.465296	0.465296	0.456133	0.375346	0.429722	0.458161	0.512556	0.383366	0.402296	0.290017	0.272713	0.342099	0.376345	0.28631	0.508812	0.330296	0.316212	0.463043	0.488433	0.441157	0.463982	0.440178	0.482121	0.540403	0.418152	0.492233	0.384844	0.415995	0.518281	0.464283	0.507665														0.42554	0.0736719
5.4584	0.489154	0.489154	0.469938	0.394738	0.452788	0.460239	0.516629	0.393449	0.378863	0.30679	0.287902	0.33656	0.410048	0.30839	0.507162	0.341014	0.32605	0.450201	0.500327	0.460971	0.496976	0.459802	0.513255	0.508698	0.426891	0.521493	0.397099	0.427725	0.489452	0.489616	0.508185														0.436115	0.0714183
5.6683	0.466805	0.466805	0.498038	0.405592	0.462274	0.510872	0.515751	0.400897	0.407877	0.301731	0.290561	0.349263	0.425265	0.28928	0.542425	0.323093	0.351893	0.430512	0.497498	0.435296	0.485182	0.432211	0.445843	0.506985	0.402128	0.540591	0.427465	0.442393	0.503999	0.471919	0.517932														0.437044	0.0723464
5.8783	0.486918	0.486918	0.537868	0.37334	0.482606	0.498832	0.518272	0.409531	0.414262	0.288574	0.28304	0.358608	0.420585	0.31471	0.56272	0.332535	0.344662	0.469237	0.500402	0.409422	0.487202	0.453796	0.473096	0.505106	0.421606	0.524487	0.432047	0.481271	0.503454	0.494909	0.527966														0.445096	0.0761117
6.0882	0.530747	0.530747	0.472912	0.384474	0.461522	0.505035	0.514065	0.402194	0.400311	0.304146	0.312007	0.35175	0.428254	0.31494	0.524309	0.311726	0.350543	0.518586	0.478263	0.528219	0.527108	0.461031	0.492672	0.576997	0.444971	0.538539	0.437301	0.469905	0.520904	0.466617	0.541484														0.454912	0.0795988
6.2982	0.51673	0.51673	0.50265	0.401372	0.474324	0.512533	0.531674	0.427388	0.424759	0.312684	0.285345	0.359138	0.42932	0.30637	0.527714	0.310589	0.345937	0.519445	0.499537	0.412906	0.516529	0.433942	0.482844	0.517253	0.438634	0.53152	0.413066	0.445758	0.539576	0.488345	0.540997														0.450504	0.0780618
6.5081	0.531052	0.531052	0.517593	0.394524	0.517504	0.553258	0.540623	0.433661	0.420144	0.301145	0.315843	0.367702	0.421541	0.33793	0.517306	0.291263	0.333212	0.456533	0.51681	0.443188	0.509743	0.472271	0.478484	0.523959	0.433209	0.550801	0.437804	0.448401	0.519687	0.489705	0.566146														0.457164	0.0801801
6.718	0.531233	0.531233	0.521658	0.418621	0.504515	0.552884	0.513835	0.445036	0.428311	0.307437	0.298622	0.384078	0.441017	0.34797	0.552084	0.310718	0.368311	0.474182	0.506552	0.467836	0.551848	0.466063	0.492144	0.529273	0.439625	0.523868	0.453806	0.475516	0.540363	0.494722	0.553505														0.465383	0.0762844
6.928	0.547859	0.547859	0.546386	0.430055	0.491798	0.523729	0.504417	0.448906	0.438591	0.299757	0.281921	0.389152	0.410584	0.34295	0.515002	0.345581	0.363752	0.496417	0.474303	0.488283	0.533143	0.494752	0.500729	0.537134	0.457196	0.531282	0.445409	0.479504	0.561935	0.500466	0.521003														0.466124	0.0757459
7.1379	0.552486	0.552486	0.500044	0.426004	0.503674	0.530572	0.538863	0.447983	0.409994	0.340963	0.337102	0.37523	0.461671	0.31845	0.485616	0.353108	0.393422	0.48479	0.489457	0.50402	0.569664	0.491584	0.483575	0.551718	0.438669	0.527082	0.471679	0.475292	0.536012	0.475345	0.557132														0.470442	0.0710487
7.3478	0.531071	0.531071	0.524084	0.404329	0.48964	0.535067	0.507209	0.445554	0.446668	0.324441	0.351071	0.386864	0.441019	0.33593	0.556274	0.371515	0.392647	0.518945	0.524344	0.45568	0.509822	0.473836	0.511928	0.524851	0.461339	0.556586	0.451339	0.440967	0.530023	0.501626	0.561888														0.470891	0.0682478
7.5578	0.527401	0.527401	0.51932	0.413847	0.479535	0.583774	0.538494	0.47699	0.407627	0.320225	0.362869	0.387746	0.447866	0.34679	0.550136	0.354421	0.400672	0.523904	0.489901	0.417709	0.585155	0.463089	0.488241	0.554111	0.443672	0.56784	0.473036	0.488641	0.521207	0.530803	0.564049														0.476015	0.0744292
7.7677	0.53385	0.53385	0.528777	0.408018	0.517788	0.530948	0.540999	0.457963	0.445756	0.299201	0.305212	0.41512	0.44836	0.34001	0.511083	0.357924	0.395951	0.502508	0.497793	0.52451	0.588104	0.452139	0.527807	0.559135	0.479404	0.545597	0.456282	0.41155	0.548421	0.543238	0.588349														0.477279	0.0790146
7.9777	0.545702	0.545702	0.553224	0.460094	0.485146	0.540591	0.542017	0.454379	0.473691	0.318264	0.343411	0.422528	0.453057	0.34841	0.523911	0.366392	0.417782	0.510983	0.501056	0.428621	0.577786	0.487665	0.505839	0.579638	0.470456	0.537619	0.455699	0.489579	0.518868	0.504504	0.541316														0.480772	0.0687271
8.1876	0.587798	0.587798	0.528834	0.434388	0.548288	0.570306	0.546854	0.495534	0.432921	0.312397	0.324578	0.390459	0.481701	0.33217	0.515445	0.382966	0.388925	0.551737	0.466089	0.54962	0.566641	0.469328	0.513088	0.593328	0.492286	0.567909	0.461923	0.435626	0.518046	0.539478	0.559726														0.488587	0.0815506
8.3975	0.576782	0.576782	0.542757	0.475594	0.535572	0.541286	0.559126	0.477214	0.440694	0.321871	0.334528	0.37714	0.429977	0.35695	0.530238	0.395437	0.402833	0.549053	0.464171	0.54806	0.570404	0.454401	0.507402	0.53915	0.478388	0.551815	0.452542	0.476508	0.538868	0.54986	0.593694														0.488681	0.0763677
8.6075	0.545489	0.545489	0.562277	0.455149	0.543806	0.571812	0.572513	0.448428	0.44521	0.336137	0.32798	0.426661	0.460248	0.34156	0.55901	0.393472	0.390764	0.557367	0.527015	0.548237	0.54171	0.485692	0.487027	0.531319	0.468267	0.541184	0.468922	0.458722	0.535521	0.503178	0.568043														0.488652	0.073033
8.8174	0.570357	0.570357	0.536087	0.471132	0.538453	0.593622	0.559389	0.461334	0.430945	0.33753	0.341832	0.391005	0.484257	0.34485	0.543425	0.400196	0.411601	0.52393	0.489192	0.601539	0.580098	0.462812	0.492823	0.586924	0.485483	0.55727	0.465683	0.486898	0.523713	0.525116	0.55104														0.494158	0.0760109
9.0274	0.551165	0.551165	0.566852	0.443298	0.546078	0.564068	0.54358	0.485038	0.452944	0.323657	0.325603	0.426419	0.438641	0.3419	0.553727	0.376061	0.400394	0.544433	0.500654	0.523001	0.598124	0.458655	0.498711	0.563339	0.494227	0.577029	0.443165	0.505856	0.544968	0.51381	0.568414														0.491128	0.0772182
9.2373	0.56688	0.56688	0.582273	0.441135	0.567257	0.541769	0.563942	0.473149	0.451262	0.339806	0.359822	0.418444	0.467235	0.34055	0.549979	0.384132	0.409331	0.526524	0.509393	0.560932	0.578042	0.478716	0.524751	0.543311	0.497355	0.591495	0.435128	0.474	0.565552	0.541662	0.573424														0.497553	0.075999
9.4472	0.577116	0.577116	0.541872	0.47176	0.616941	0.561332	0.546014	0.480684	0.452643	0.354837	0.335003	0.415114	0.46883	0.36003	0.538434	0.403638	0.404664	0.540024	0.544344	0.522682	0.574481	0.475222	0.51972	0.611852	0.485587	0.583664	0.476746	0.489985	0.557325	0.531163	0.573668														0.502984	0.0759236
9.6572	0.566374	0.566374	0.53711	0.435655	0.544366	0.536577	0.565028	0.493099	0.465658	0.32169	0.340101	0.410505	0.497117	0.34298	0.544595	0.381232	0.417533	0.481377	0.500953	0.46866	0.588069	0.491815	0.49586	0.588832	0.475413	0.567715	0.481544	0.489977	0.56085	0.54334	0.577142														0.492824	0.0749775
9.8671	0.594331	0.594331	0.498215	0.455515	0.542946	0.57665	0.537612	0.496076	0.46893	0.330698	0.343344	0.417221	0.429408	0.36588	0.535943	0.407582	0.429436	0.533226	0.50233	0.554127	0.591207	0.438856	0.487125	0.579089	0.491803	0.567727	0.479364	0.514841	0.560409	0.504591	0.551716														0.496146	0.0733567
10.077	0.599147	0.599147	0.580015	0.44402	0.557753	0.550786	0.551388	0.469082	0.448224	0.337078	0.301222	0.41396	0.420306	0.34329	0.5762	0.403069	0.428255	0.601016	0.465215	0.546925	0.584038	0.474	0.537551	0.575393	0.493004	0.59767	0.47027	0.490674	0.553076	0.577483	0.556182														0.501466	0.0850538
10.287	0.595263	0.595263	0.560748	0.449825	0.607218	0.565158	0.568359	0.465252	0.456061	0.349072	0.326818	0.428964	0.449375	0.36184	0.561391	0.399267	0.415016	0.531622	0.487036	0.601587	0.561205	0.505038	0.526422	0.536072	0.493599	0.568981	0.48302	0.458233	0.56372	0.549152	0.580925														0.503274	0.0785919
10.4969	0.59052	0.59052	0.556071	0.463378	0.588924	0.589278	0.560692	0.486332	0.448156	0.339226	0.332611	0.407902	0.470245	0.37296	0.537621	0.387852	0.398978	0.542178	0.53388	0.615774	0.600038	0.550966	0.496761	0.55457	0.498862	0.611667	0.492492	0.436099	0.544152	0.561838	0.559738														0.507106	0.0822987
10.7069	0.622949	0.622949	0.560826	0.430645	0.549291	0.573744	0.558634	0.490504	0.439744	0.371351	0.361079	0.4356	0.482456	0.3589	0.600754	0.405276	0.436173	0.556594	0.521733	0.53872	0.561089	0.479298	0.503445	0.576261	0.537315	0.5639	0.481688	0.456828	0.547972	0.551377	0.588561														0.50857	0.0753936
10.9168	0.628861	0.628861	0.564035	0.46453	0.545364	0.585853	0.556926	0.495581	0.468178	0.344816	0.356785	0.421841	0.498672	0.373	0.601628	0.388427	0.406734	0.548489	0.515196	0.627175	0.548884	0.497626	0.506998	0.601923	0.493037	0.55558	0.491605	0.509929	0.569405	0.543022	0.596563														0.514049	0.0806941
11.1267	0.65458	0.65458	0.573649	0.456888	0.583189	0.57021	0.555011	0.51015	0.454554	0.34479	0.336797	0.430673	0.478818	0.38646	0.583331	0.416312	0.444054	0.520271	0.56411	0.563477	0.54763	0.467362	0.467978	0.558097	0.542925	0.58468	0.48438	0.472879	0.566312	0.535084	0.583004														0.512653	0.079979
11.3367	0.611612	0.611612	0.567636	0.46109	0.589345	0.567176	0.560614	0.510723	0.430157	0.361243	0.32797	0.419815	0.498504	0.36691	0.548631	0.407928	0.451144	0.53209	0.535032	0.604402	0.578775	0.481034	0.532685	0.529812	0.527242	0.586645	0.489498	0.485469	0.586122	0.529469	0.545011														0.510819	0.076446
11.5466	0.611086	0.611086	0.5704	0.475357	0.555616	0.544976	0.578773	0.524615	0.43279	0.367018	0.354236	0.422889	0.516747	0.38038	0.578757	0.404868	0.415497	0.498908	0.508315	0.547195	0.568093	0.492941	0.466617	0.573697	0.498548	0.566903	0.522423	0.481869	0.565919	0.524046	0.564466														0.507259	0.0718409
11.7566	0.621257	0.621257	0.577411	0.438307	0.56564	0.552427	0.560861	0.518107	0.454439	0.366812	0.364288	0.413915	0.490844	0.38046	0.572308	0.404232	0.441564	0.496179	0.512684	0.5166	0.599007	0.479317	0.48764	0.585629	0.532525	0.597628	0.492099	0.47165	0.583952	0.526526	0.560297														0.509221	0.074498
11.9665	0.645612	0.645612	0.602001	0.46678	0.585548	0.565813	0.565105	0.531317	0.437264	0.362169	0.377642	0.437668	0.530882	0.38444	0.577722	0.414634	0.431354	0.472618	0.551648	0.482309	0.592813	0.505382	0.538686	0.573581	0.518945	0.591985	0.498261	0.471076	0.559946	0.541212	0.597013														0.517969	0.077149
12.1764	0.655076	0.655076	0.586435	0.502551	0.586852	0.532744	0.567379	0.500214	0.464831	0.371012	0.355647	0.433686	0.47942	0.37736	0.608169	0.412547	0.425079	0.526094	0.504339	0.525518	0.59782	0.500792	0.517645	0.569486	0.499088	0.584072	0.456859	0.441874	0.598346	0.540081	0.578597														0.514667	0.0798794
12.3864	0.606234	0.606234	0.59529	0.467324	0.577706	0.566903	0.528598	0.511413	0.449713	0.352092	0.375257	0.442348	0.493524	0.38579	0.597543	0.408386	0.487119	0.583503	0.519589	0.476828	0.595201	0.525889	0.501059	0.549934	0.51413	0.560051	0.489788	0.481173	0.599848	0.523901	0.565995														0.514141	0.0711137
12.5963	0.625253	0.625253	0.593485	0.4602	0.578942	0.572749	0.585577	0.504353	0.46356	0.357274	0.370859	0.445708	0.476042	0.39138	0.592184	0.406051	0.44797	0.501589	0.497654	0.499774	0.574068	0.465783	0.491618	0.552907	0.505473	0.566746	0.447792	0.50321	0.573798	0.581502	0.557975														0.510217	0.0737706
12.8062	0.609496	0.609496	0.552687	0.482024	0.574495	0.548514	0.585849	0.521325	0.45321	0.369802	0.376198	0.451544	0.47461	0.38763	0.550086	0.402945	0.468307	0.491901	0.529462	0.551278	0.61622	0.500847	0.477837	0.610288	0.499383	0.564402	0.471334	0.509209	0.585966	0.546855	0.559407														0.513955	0.0701626
13.0162	0.615828	0.615828	0.549151	0.508929	0.572708	0.582296	0.600292	0.503912	0.472224	0.380273	0.356149	0.445291	0.515639	0.38187	0.538149	0.409802	0.422439	0.531234	0.550646	0.541176	0.604047	0.541354	0.51286	0.599011	0.506724	0.584585	0.508176	0.471127	0.626031	0.572679	0.546085														0.5215	0.0741304
13.2261	0.630279	0.630279	0.559381	0.493547	0.55505	0.573245	0.596723	0.51127	0.445315	0.382489	0.387938	0.457992	0.518309	0.38763	0.575467	0.421383	0.44595	0.513135	0.538175	0.616573	0.636585	0.51812	0.498525	0.581054	0.538428	0.592104	0.511439	0.511567	0.620187	0.575679	0.56927														0.528809	0.0740524
13.4361	0.59699	0.59699	0.548224	0.463249	0.596276	0.555133	0.589821	0.516219	0.435435	0.379338	0.394871	0.474648	0.526975	0.39794	0.597928	0.411474	0.450629	0.510349	0.530166	0.557336	0.56859	0.529517	0.493734	0.61938	0.50634	0.582067	0.469434	0.462952	0.614849	0.565314	0.607665														0.520962	0.0714703
13.646	0.622327	0.622327	0.492735	0.468338	0.559722	0.543048	0.605584	0.522259	0.493279	0.356248	0.38253	0.451593	0.533104	0.39946	0.5536	0.412925	0.425265	0.586251	0.496631	0.568271	0.567498	0.486595	0.521216	0.606495	0.521222	0.57042	0.506757	0.49431	0.62598	0.539225	0.592051														0.520234	0.0729062
13.8559	0.604076	0.604076	0.579185	0.472715	0.586675	0.550377	0.599451	0.531375	0.416724	0.358986	0.370844	0.459591	0.501531	0.37289	0.583871	0.42004	0.47622	0.578814	0.538028	0.598999	0.611142	0.527436	0.507567	0.523147	0.52146	0.577881	0.498572	0.475768	0.61153	0.558287	0.589146														0.522787	0.075465
14.0659	0.6005	0.6005	0.55695	0.518405	0.571193	0.58655	0.590244	0.53509	0.45505	0.391296	0.365662	0.451258	0.476746	0.3816	0.587322	0.417026	0.464536	0.538357	0.575725	0.619564	0.624637	0.496406	0.533323	0.526446	0.511347	0.589724	0.48743	0.479878	0.584373	0.558304	0.597724														0.524941	0.0727298
14.2758	0.578148	0.578148	0.593578	0.488531	0.554738	0.546271	0.56711	0.533249	0.428836	0.383911	0.370355	0.44142	0.466907	0.38204	0.550822	0.416304	0.466876	0.552239	0.568322	0.66777	0.588405	0.517766	0.489431	0.577708	0.525148	0.594384	0.499283	0.436545	0.618483	0.56538	0.585105														0.520426	0.0757932
14.4858	0.614327	0.614327	0.581569	0.437084	0.590887	0.556415	0.576948	0.531629	0.429682	0.369494	0.37951	0.467923	0.485645	0.38299	0.597631	0.422253	0.480991	0.566448	0.560088	0.634843	0.601301	0.537859	0.508203	0.519487	0.525956	0.602108	0.471419	0.495876	0.634145	0.520114	0.573983														0.524875	0.0769093
14.6957	0.620972	0.620972	0.570716	0.456005	0.59016	0.559885	0.621636	0.526068	0.444543	0.373928	0.373675	0.452105	0.486895	0.38597	0.629398	0.419907	0.453683	0.535618	0.591436	0.658058	0.588626	0.500215	0.535761	0.562384	0.519359	0.586299	0.487399	0.469135	0.633121	0.548637	0.56982														0.528141	0.0808448
14.9056	0.618303	0.618303	0.591882	0.488236	0.582854	0.581637	0.615714	0.529845	0.438755	0.370526	0.361776	0.456311	0.466909	0.39443	0.622601	0.412067	0.443886	0.581269	0.6106	0.580725	0.594942	0.481686	0.472197	0.598795	0.501371	0.600587	0.461927	0.474071	0.650567	0.569427	0.600594														0.528155	0.0845729
15.1156	0.634028	0.634028	0.60363	0.466131	0.585895	0.578937	0.603999	0.524102	0.464593	0.379672	0.388268	0.463406	0.469851	0.38515	0.595443	0.413794	0.454861	0.576964	0.59157	0.607257	0.579765	0.515402	0.496301	0.527908	0.523054	0.587624	0.489314	0.433595	0.631948	0.546041	0.572219														0.526605	0.0782717
15.3255	0.623805	0.623805	0.582857	0.451397	0.547551	0.56286	0.575719	0.546189	0.455742	0.363045	0.3858	0.459078	0.440704	0.37778	0.579724	0.388049	0.485253	0.562303	0.556679	0.632405	0.578981	0.497777	0.487167	0.556006	0.538851	0.595831	0.519025	0.476251	0.640536	0.572378	0.602441														0.524709	0.0794352
15.5354	0.619645	0.619645	0.582039	0.463509	0.591042	0.543576	0.600923	0.538628	0.435431	0.371399	0.3983	0.477049	0.46594	0.3912	0.58709	0.40559	0.445678	0.539998	0.566542	0.59598	0.597477	0.503291	0.479389	0.566613	0.513968	0.592893	0.472274	0.424892	0.646072	0.560795	0.597087														0.522386	0.0788148
15.7454	0.602116	0.602116	0.578226	0.473711	0.601	0.565218	0.575611	0.525487	0.453342	0.364174	0.377715	0.46448	0.510476	0.40546	0.606424	0.419416	0.410751	0.575683	0.583513	0.627475	0.559372	0.506839	0.475244	0.566354	0.511427	0.60389	0.471702	0.457092	0.628293	0.562129	0.580775														0.524049	0.0774986
15.9553	0.598679	0.598679	0.600671	0.489677	0.58844	0.534167	0.585709	0.51634	0.462209	0.385553	0.363832	0.46382	0.461762	0.40386	0.599157	0.411908	0.4347	0.578486	0.541005	0.57743	0.604456	0.47929	0.4879	0.563659	0.522797	0.604856	0.481414	0.471948	0.638109	0.548536	0.607231														0.522783	0.0757444
16.1653	0.603168	0.603168	0.568243	0.448045	0.576348	0.55354	0.585235	0.448383	0.450817	0.366895	0.393162	0.467167	0.445309	0.41355	0.599109	0.409501	0.442308	0.548823	0.575139	0.626379	0.610538	0.470474	0.479709	0.53546	0.541951	0.606362	0.468262	0.482708	0.610275	0.565789	0.601215														0.519259	0.0774763
16.3752	0.617566	0.617566	0.598537	0.484591	0.577522	0.516095	0.588785	0.512397	0.459792	0.384083	0.367435	0.477238	0.49817	0.40334	0.609004	0.397061	0.427181	0.578508	0.568371	0.592253	0.634386	0.496164	0.511826	0.561486	0.509578	0.576606	0.495888	0.462639	0.622716	0.538947	0.56764														0.524302	0.076098
16.5851	0.618053	0.618053	0.597986	0.489978	0.582462	0.57747	0.614296	0.506523	0.458627	0.380687	0.394688	0.450535	0.515079	0.4007	0.615819	0.399617	0.446989	0.566617	0.557897	0.577437	0.636831	0.5054	0.476365	0.571925	0.533504	0.614727	0.481796	0.432847	0.621721	0.54146	0.551946														0.527033	0.0781729
16.7951	0.612337	0.612337	0.587519	0.458627	0.618125	0.563324	0.582393	0.500425	0.47179	0.382394	0.37645	0.446967	0.552889	0.42187	0.598371	0.414196	0.496864	0.617214	0.554908	0.530339	0.598254	0.488426	0.485439	0.555319	0.511597	0.602023	0.467497	0.446444	0.627256	0.525569	0.600537														0.526055	0.0750846
17.005	0.638346	0.638346	0.604042	0.443891	0.577365	0.611276	0.613749	0.535932	0.46222	0.371449	0.396443	0.451321	0.555126	0.41797	0.604537	0.420657	0.496179	0.576499	0.557812	0.580344	0.617443	0.453781	0.519048	0.51918	0.543785	0.614456	0.474537	0.486331	0.60206	0.554766	0.567527														0.532465	0.0766737
17.215	0.631699	0.631699	0.574202	0.477238	0.553126	0.576417	0.58651	0.500535	0.476902	0.378124	0.40705	0.4496	0.515802	0.40373	0.616485	0.429333	0.455236	0.554568	0.548334	0.518229	0.593926	0.452928	0.509948	0.567388	0.542035	0.597269	0.503673	0.500131	0.645553	0.570304	0.579709														0.527345	0.0719673
17.4249	0.627417	0.627417	0.589893	0.473705	0.609942	0.591796	0.600895	0.513969	0.47671	0.376324	0.441408	0.486041	0.499901	0.39966	0.637747	0.436436	0.449151	0.586908	0.582596	0.562454	0.617379	0.493617	0.490811	0.531835	0.552724	0.590742	0.484526	0.441995	0.625506	0.540586	0.603339														0.533659	0.0748404
17.6348	0.611536	0.611536	0.579119	0.469261	0.561553	0.575117	0.590375	0.537902	0.500795	0.364714	0.380447	0.461439	0.523781	0.40077	0.636873	0.440093	0.472709	0.61603	0.600297	0.541125	0.597335	0.488891	0.490705	0.556428	0.545658	0.60647	0.498095	0.454093	0.64562	0.531957	0.604425														0.532102	0.0760443
17.8448	0.610609	0.610609	0.589447	0.468047	0.574124	0.583541	0.577762	0.527287	0.457187	0.377165	0.39452	0.464365	0.526942	0.38727	0.643888	0.438723	0.466581	0.566808	0.54442	0.554471	0.598195	0.49117	0.506357	0.594955	0.573273	0.595083	0.504838	0.523128	0.644492	0.536573	0.57178														0.532375	0.0728256
18.0547	0.629895	0.629895	0.603014	0.456277	0.595733	0.585694	0.579394	0.541335	0.483055	0.394488	0.39337	0.430111	0.481141	0.4161	0.597767	0.438436	0.497188	0.556448	0.559748	0.548039	0.615848	0.473675	0.542379	0.573526	0.546765	0.613616	0.505576	0.453191	0.631272	0.528373	0.578169														0.531597	0.0730548
18.2646	0.617877	0.617877	0.595066	0.454376	0.576774	0.611966	0.586258	0.569229	0.482051	0.399587	0.398924	0.443857	0.49746	0.39903	0.619321	0.43648	0.475972	0.56072	0.589647	0.498484	0.618837	0.474324	0.495559	0.564935	0.548207	0.596551	0.48036	0.496872	0.633058	0.540966	0.623097														0.532378	0.074659
18.4746	0.647997	0.647997	0.626611	0.498442	0.582773	0.576898	0.622847	0.561614	0.498753	0.39918	0.393085	0.448235	0.475396	0.4156	0.609003	0.419518	0.459613	0.529524	0.563142	0.591468	0.626786	0.524136	0.50173	0.593005	0.530408	0.619859	0.486601	0.47316	0.609024	0.528987	0.620901														0.538138	0.0775597
18.6845	0.622378	0.622378	0.577834	0.469019	0.618006	0.545233	0.647931	0.562816	0.488227	0.386903	0.385526	0.466072	0.512334	0.41326	0.585303	0.43912	0.476584	0.582546	0.571768	0.527526	0.573166	0.471221	0.505968	0.588803	0.558534	0.611634	0.50294	0.476736	0.658325	0.52072	0.603091														0.534577	0.0747189
18.8945	0.618739	0.618739	0.615641	0.448584	0.598677	0.566582	0.621655	0.562785	0.493726	0.394279	0.417124	0.45966	0.538136	0.43994	0.610395	0.443915	0.483194	0.548146	0.570039	0.503812	0.603024	0.499775	0.477829	0.591922	0.53508	0.611897	0.503154	0.480674	0.646413	0.540725	0.60549														0.537089	0.0707163
19.1044	0.622865	0.622865	0.599625	0.451277	0.593508	0.556829	0.592824	0.561596	0.506546	0.382321	0.378412	0.474212	0.530036	0.41635	0.681489	0.458328	0.471778	0.596976	0.575372	0.528088	0.598583	0.486469	0.521957	0.547751	0.537177	0.630357	0.475292	0.527728	0.642275	0.530337	0.620905														0.539359	0.0765147
19.3143	0.624542	0.624542	0.579953	0.424431	0.567104	0.547704	0.607834	0.574941	0.516994	0.394621	0.40192	0.4649	0.488902	0.41775	0.590805	0.429477	0.475427	0.588913	0.57968	0.597096	0.584634	0.465161	0.519112	0.603205	0.532548	0.617549	0.465103	0.477473	0.63997	0.541153	0.616														0.534176	0.0749034
19.5243	0.625046	0.625046	0.618562	0.420132	0.587961	0.566324	0.598099	0.565565	0.510546	0.393971	0.3899	0.443945	0.520709	0.42682	0.612432	0.440511	0.477313	0.558585	0.564277	0.635936	0.614048	0.49854	0.505385	0.567324	0.536794	0.570702	0.501506	0.550636	0.637422	0.561953	0.610438														0.539885	0.074162
19.7342	0.687838	0.687838	0.59723	0.433519	0.566456	0.590664	0.568658	0.538566	0.494037	0.383829	0.389031	0.449314	0.534734	0.4316	0.616804	0.419674	0.470007	0.573497	0.586962	0.559253	0.595642	0.505516	0.514259	0.581688	0.530611	0.630499	0.483948	0.497247	0.639871	0.577399	0.612415														0.540278	0.0810831
19.9442	0.653998	0.653998	0.590324	0.485355	0.580753	0.592494	0.629462	0.545725	0.491101	0.400107	0.393186	0.445763	0.508814	0.43702	0.602474	0.432126	0.506896	0.601127	0.592119	0.5756	0.646607	0.49711	0.482527	0.586701	0.540547	0.641077	0.469527	0.471203	0.647077	0.548921	0.600484														0.543556	0.0786783
20.1541	0.648865	0.648865	0.589527	0.481746	0.589375	0.62598	0.611381	0.563745	0.5165	0.38791	0.398241	0.459679	0.518009	0.42712	0.596219	0.457931	0.495319	0.586395	0.578275	0.634154	0.599432	0.474901	0.510736	0.586139	0.533325	0.659429	0.473674	0.500154	0.648417	0.573182	0.623207														0.548317	0.0777934
20.364	0.665059	0.665059	0.653618	0.516387	0.59676	0.586752	0.61325	0.561178	0.529486	0.369179	0.404413	0.478034	0.546024	0.40626	0.578069	0.434547	0.481081	0.574294	0.558451	0.582324	0.59452	0.527433	0.487292	0.618578	0.546304	0.627592	0.48148	0.479492	0.649314	0.576259	0.622686														0.548748	0.0794488
20.574	0.636195	0.636195	0.609187	0.479981	0.575874	0.630052	0.577709	0.549281	0.504609	0.391861	0.409495	0.466911	0.478765	0.41116	0.620151	0.428925	0.432928	0.53009	0.592465	0.586783	0.587716	0.463926	0.515475	0.647626	0.583933	0.62663	0.48655	0.532612	0.674744	0.535078	0.613582														0.542467	0.0806201
20.7839	0.663774	0.663774	0.605373	0.496451	0.573344	0.601272	0.572116	0.541637	0.518051	0.38435	0.402133	0.480897	0.492614	0.39853	0.6088	0.443379	0.486345	0.567893	0.609788	0.654331	0.609954	0.479688	0.546324	0.631457	0.549508	0.616075	0.467002	0.552585	0.66407	0.555819	0.591562														0.549319	0.0799493
20.9938	0.643765	0.643765	0.611125	0.460922	0.581446	0.577075	0.599887	0.560434	0.529884	0.396735	0.402187	0.494863	0.468709	0.41326	0.60037	0.420562	0.473557	0.539873	0.601695	0.642498	0.584322	0.488833	0.447131	0.553784	0.527766	0.626863	0.471039	0.493934	0.678832	0.577105	0.633249														0.540176	0.0809727
21.2038	0.645431	0.645431	0.6029	0.447254	0.596882	0.615458	0.585536	0.552243	0.514316	0.380723	0.413683	0.47873	0.498828	0.40156	0.660321	0.440524	0.488657	0.609183	0.597227	0.547259	0.612224	0.506942	0.477848	0.631388	0.557405	0.604776	0.475174	0.539558	0.660534	0.52603	0.582971														0.545064	0.0797214
21.4137	0.667638	0.667638	0.601448	0.439536	0.627378	0.598155	0.617847	0.553862	0.502081	0.383628	0.404868	0.484695	0.510381	0.39711	0.626523	0.43913	0.48592	0.553799	0.58027	0.55189	0.627887	0.512435	0.48274	0.63475	0.557307	0.607644	0.474208	0.573778	0.701791	0.543187	0.60621														0.548895	0.0844526
21.6237	0.668794	0.668794	0.599076	0.448738	0.582294	0.580799	0.621145	0.561112	0.491104	0.401551	0.450045	0.49207	0.514932	0.40322	0.620167	0.44038	0.480818	0.579539	0.618391	0.526347	0.615179	0.476047	0.520967	0.60254	0.560883	0.629595	0.466229	0.558968	0.680366	0.509683	0.608809														0.547696	0.0788062
21.8336	0.6919	0.6919	0.561881	0.438803	0.586064	0.562958	0.613833	0.541628	0.520378	0.382049	0.419847	0.464657	0.496463	0.38983	0.587247	0.455252	0.480676	0.582062	0.590132	0.549982	0.620589	0.522288	0.505919	0.624229	0.569384	0.627645	0.482601	0.567947	0.673241	0.580045	0.580691														0.547165	0.0815036
22.0435	0.676494	0.676494	0.62096	0.42309	0.573017	0.565067	0.604627	0.53904	0.498377	0.387387	0.397699	0.489265	0.508569	0.40588	0.649045	0.445893	0.456086	0.630145	0.655765	0.554252	0.589941	0.487128	0.498273	0.625933	0.571704	0.626245	0.493291	0.584835	0.672445	0.560192	0.612884														0.550968	0.0868532
22.2535	0.638122	0.638122	0.58597	0.489562	0.589959	0.574559	0.587082	0.547425	0.51066	0.38534	0.383785	0.473294	0.472354	0.41874	0.618385	0.446706	0.489251	0.587005	0.637466	0.477035	0.625158	0.484127	0.507678	0.627403	0.546459	0.628732	0.507427	0.552899	0.675761	0.53302	0.620814														0.543881	0.0792947
22.4634	0.696854	0.696854	0.59117	0.497551	0.597004	0.587265	0.629233	0.555616	0.500654	0.389396	0.376363	0.47981	0.507666	0.40636	0.658697	0.471626	0.498575	0.649384	0.604316	0.629882	0.605197	0.496242	0.530005	0.586104	0.574858	0.641681	0.462081	0.6042	0.693853	0.526664	0.623935														0.560293	0.0882754
22.6734	0.669343	0.669343	0.613074	0.482807	0.615775	0.616606	0.583391	0.544227	0.48746	0.395326	0.398436	0.467798	0.493609	0.39259	0.669551	0.427216	0.497757	0.546214	0.574782	0.501506	0.590018	0.529864	0.534146	0.597737	0.580281	0.635026	0.448933	0.525775	0.677501	0.559298	0.585773														0.545521	0.0832617
22.8833	0.646575	0.646575	0.601662	0.483653	0.602546	0.582772	0.608223	0.550365	0.513478	0.40486	0.428244	0.47747	0.504119	0.39728	0.612732	0.459566	0.508585	0.608927	0.607055	0.546618	0.592255	0.476511	0.531493	0.604091	0.554465	0.642744	0.458135	0.587922	0.657069	0.536553	0.582501														0.548872	0.0737213
23.0932	0.683309	0.683309	0.593832	0.477282	0.598285	0.595173	0.621352	0.570253	0.516652	0.41056	0.406937	0.484725	0.519886	0.38774	0.659976	0.451408	0.483041	0.58871	0.629206	0.608077	0.593596	0.528571	0.511519	0.630074	0.570131	0.604213	0.453551	0.559631	0.661158	0.554553	0.613261														0.556451	0.0817859
23.3032	0.670306	0.670306	0.610437	0.484987	0.587788	0.544432	0.622303	0.520388	0.496248	0.386794	0.36818	0.475353	0.500856	0.38538	0.674509	0.471859	0.507471	0.620749	0.623608	0.595284	0.593643	0.47956	0.502204	0.612904	0.554708	0.626567	0.484923	0.530942	0.664862	0.585818	0.593066														0.549885	0.08522
23.5131	0.648182	0.648182	0.626553	0.480743	0.578234	0.563074	0.641659	0.552012	0.483766	0.416331	0.350749	0.499685	0.522979	0.38569	0.595775	0.446847	0.475791	0.586366	0.617428	0.618543	0.594017	0.495439	0.489807	0.620816	0.548329	0.60681	0.469638	0.601253	0.678078	0.5546	0.592639														0.548065	0.0825287
23.723	0.662384	0.662384	0.634492	0.498565	0.587457	0.578821	0.612538	0.538713	0.467888	0.388082	0.404075	0.475538	0.497261	0.39318	0.618076	0.458594	0.520972	0.65084	0.5983	0.55006	0.622516	0.473131	0.503361	0.576146	0.552216	0.606445	0.480005	0.552871	0.676988	0.546022	0.566939														0.546931	0.0802256
23.933	0.662227	0.662227	0.591651	0.511283	0.612977	0.556087	0.633253	0.570441	0.456636	0.373279	0.419585	0.501557	0.480763	0.39179	0.63159	0.446613	0.526393	0.561062	0.613368	0.538821	0.595414	0.48453	0.526257	0.62248	0.545265	0.627561	0.476628	0.548328	0.659922	0.506115	0.609977														0.546583	0.0799796
24.1429	0.683198	0.683198	0.631946	0.486683	0.63881	0.55725	0.580815	0.563248	0.486048	0.397344	0.407875	0.48549	0.523871	0.39869	0.6572	0.440692	0.507173	0.600323	0.590667	0.531469	0.599708	0.496225	0.499025	0.638153	0.538454	0.633068	0.485065	0.511471	0.65722	0.550197	0.596849														0.55024	0.0821714
24.3529	0.655067	0.655067	0.596624	0.482091	0.610092	0.496566	0.613343	0.552918	0.513012	0.377451	0.439613	0.494899	0.512174	0.37948	0.638097	0.432961	0.497362	0.638926	0.608603	0.608195	0.58081	0.504733	0.525447	0.586517	0.540492	0.637903	0.477383	0.55694	0.672624	0.543305	0.580252														0.548676	0.0794136
24.5628	0.690555	0.690555	0.634065	0.535698	0.605134	0.603895	0.593543	0.552745	0.524	0.396509	0.411102	0.486129	0.51121	0.36938	0.652239	0.448715	0.484387	0.553092	0.644231	0.639503	0.599547	0.52203	0.497541	0.619977	0.558195	0.643283	0.516877	0.572456	0.656875	0.544291	0.600341														0.559939	0.0837588
24.7727	0.70923	0.70923	0.604372	0.555134	0.615161	0.598956	0.620323	0.564676	0.52158	0.40364	0.429983	0.469709	0.476405	0.38326	0.650019	0.464068	0.512774	0.579521	0.603956	0.590399	0.58868	0.474817	0.537512	0.659899	0.530692	0.645633	0.493864	0.527734	0.666634	0.54653	0.609334														0.559475	0.0842382
24.9827	0.694844	0.694844	0.625046	0.566787	0.605327	0.587184	0.618731	0.554105	0.523557	0.407143	0.402964	0.470435	0.465082	0.39517	0.621191	0.469023	0.467207	0.621461	0.648599	0.563583	0.565498	0.461078	0.517744	0.625152	0.521356	0.641272	0.492018	0.575446	0.675687	0.539686	0.608774														0.555677	0.0850777
25.1926	0.681076	0.681076	0.590046	0.621214	0.619497	0.602998	0.616425	0.559009	0.540856	0.378464	0.446071	0.464134	0.493723	0.40852	0.648249	0.453511	0.522794	0.581188	0.628778	0.504191	0.608686	0.525594	0.475234	0.628073	0.512465	0.642247	0.487212	0.532909	0.711926	0.557853	0.588357														0.558464	0.0833518
25.4026	0.693084	0.693084	0.624581	0.61019	0.610217	0.634807	0.621666	0.556958	0.526635	0.385823	0.443685	0.501374	0.480333	0.41402	0.690653	0.478575	0.54083	0.630339	0.62608	0.599777	0.606558	0.515601	0.442162	0.588504	0.560117	0.624641	0.467563	0.617209	0.69712	0.538579	0.592736														0.568177	0.0852785
25.6125	0.708692	0.708692	0.605306	0.571602	0.604898	0.598989	0.596246	0.542344	0.488047	0.396078	0.442009	0.471183	0.499898	0.37299	0.629792	0.432863	0.497243	0.622	0.625385	0.582928	0.622174	0.487794	0.490103	0.616289	0.56199	0.618402	0.478157	0.531921	0.705586	0.48724	0.596383														0.55462	0.088049
25.8224	0.720191	0.720191	0.602468	0.531571	0.59473	0.603645	0.61901	0.530284	0.531529	0.379402	0.433266	0.485392	0.51923	0.38767	0.66394	0.455946	0.521716	0.623476	0.612389	0.539232	0.578129	0.507806	0.456461	0.632887	0.536035	0.655607	0.449418	0.556195	0.71997	0.508873	0.564092														0.556153	0.0907252
26.0324	0.687541	0.687541	0.642815	0.522073	0.586288	0.585686	0.610619	0.55072	0.532664	0.375622	0.438832	0.478338	0.512731	0.39679	0.666304	0.452455	0.487669	0.598628	0.613489	0.650778	0.591692	0.497405	0.476689	0.609433	0.552846	0.595432	0.456359	0.586513	0.718869	0.543168	0.579087														0.557583	0.0862651
26.2423	0.716672	0.716672	0.673811	0.508519	0.627637	0.607306	0.606012	0.54415	0.553067	0.395161	0.42425	0.457703	0.483187	0.38449	0.626435	0.453423	0.478386	0.551291	0.621532	0.646453	0.5867	0.492269	0.475972	0.613272	0.582488	0.602104	0.480828	0.561568	0.710703	0.541404	0.573533														0.557968	0.090797
26.4523	0.719944	0.719944	0.635099	0.578641	0.581353	0.58925	0.648879	0.542527	0.509141	0.381526	0.366419	0.458119	0.493268	0.39245	0.600307	0.438991	0.484245	0.633434	0.570187	0.644484	0.608129	0.533808	0.459586	0.600581	0.550144	0.626435	0.478386	0.536687	0.698092	0.568581	0.582783														0.555852	0.0933994
26.6622	0.697734	0.697734	0.617686	0.520327	0.586312	0.599665	0.610672	0.566035	0.509473	0.380758	0.412375	0.474121	0.49751	0.36805	0.641413	0.453622	0.485226	0.630465	0.595563	0.538014	0.617729	0.448533	0.470102	0.682966	0.568512	0.615705	0.482939	0.545222	0.695764	0.51582	0.560151														0.551168	0.091071
26.8721	0.700094	0.700094	0.60807	0.539381	0.608151	0.579886	0.622914	0.561922	0.51971	0.386247	0.383917	0.463809	0.533859	0.38758	0.664832	0.441507	0.503464	0.643639	0.631936	0.528448	0.615982	0.515505	0.44403	0.601486	0.549179	0.628002	0.470691	0.573772	0.692563	0.534231	0.571551														0.555047	0.0900631
27.0821	0.687765	0.687765	0.632125	0.505894	0.579367	0.615803	0.593281	0.556612	0.521449	0.392001	0.393171	0.477982	0.51514	0.37301	0.674338	0.432793	0.481134	0.59947	0.647664	0.546218	0.613924	0.489267	0.479419	0.634239	0.527007	0.621862	0.477794	0.555736	0.686316	0.516828	0.579972														0.551463	0.0892759
27.292	0.724563	0.724563	0.652257	0.501165	0.600376	0.591336	0.630115	0.541753	0.506307	0.379233	0.430229	0.490059	0.521313	0.42202	0.666079	0.417838	0.486426	0.648455	0.665167	0.593623	0.613132	0.529039	0.476655	0.589218	0.552501	0.583006	0.462948	0.553577	0.712566	0.554181	0.578925														0.561246	0.0920076
27.5019	0.702451	0.702451	0.630334	0.54564	0.604177	0.623951	0.579332	0.541585	0.522313	0.397082	0.402888	0.452858	0.502804	0.36331	0.66458	0.432505	0.497854	0.642035	0.579347	0.622875	0.676185	0.501765	0.491307	0.613789	0.54041	0.607055	0.442954	0.628654	0.71007	0.537721	0.587355														0.559601	0.0948616
27.7119	0.695773	0.695773	0.610039	0.542717	0.59836	0.621946	0.628817	0.565885	0.497823	0.403256	0.397886	0.473974	0.518157	0.40654	0.684182	0.442901	0.484579	0.567041	0.61839	0.595705	0.602236	0.47416	0.454678	0.621865	0.530772	0.61583	0.446422	0.555807	0.691009	0.553209	0.556397														0.553294	0.0882256
27.9218	0.706571	0.706571	0.606287	0.533861	0.589676	0.567855	0.597381	0.546523	0.54174	0.386414	0.386777	0.498156	0.522867	0.40057	0.658508	0.467848	0.479584	0.609026	0.556996	0.639774	0.618473	0.523221	0.462479	0.661518	0.576802	0.61069	0.465597	0.594009	0.708986	0.546072	0.562527														0.559141	0.0880773
28.1318	0.66589	0.66589	0.612125	0.517984	0.598718	0.62776	0.624566	0.559842	0.510248	0.396635	0.403688	0.491779	0.470361	0.40741	0.696117	0.410114	0.505992	0.615771	0.605744	0.562551	0.638344	0.487275	0.485561	0.681995	0.557946	0.626661	0.442754	0.541146	0.754477	0.524577	0.571403														0.556817	0.0940123
28.3417	0.724661	0.724661	0.613936	0.542396	0.631418	0.624566	0.601275	0.549685	0.489483	0.399145	0.412615	0.491236	0.521618	0.38645	0.68487	0.43149	0.522681	0.560339	0.550944	0.563244	0.655827	0.488317	0.509327	0.658933	0.55262	0.608537	0.466364	0.557495	0.712983	0.507937	0.567418														0.558467	0.0921892
28.5516	0.699024	0.699024	0.617552	0.530548	0.628616	0.651179	0.586531	0.537012	0.493254	0.40645	0.394832	0.500801	0.527839	0.40761	0.640924	0.461726	0.532927	0.609227	0.586355	0.575402	0.633116	0.53955	0.451482	0.62628	0.529658	0.616001	0.471399	0.570363	0.728738	0.530415	0.567135														0.559709	0.0863717
28.7616	0.683793	0.683793	0.622885	0.524667	0.583106	0.642651	0.609612	0.542091	0.492422	0.421677	0.389577	0.485062	0.541277	0.38855	0.67367	0.480379	0.498191	0.611155	0.614902	0.594712	0.616529	0.490657	0.435887	0.670986	0.583367	0.598551	0.472626	0.553728	0.711628	0.542116	0.591518														0.559734	0.0882714
28.9715	0.70414	0.70414	0.631842	0.528805	0.586382	0.61562	0.574231	0.55571	0.513308	0.422403	0.387163	0.467978	0.534687	0.40666	0.683671	0.44694	0.518856	0.580365	0.612531	0.534855	0.618564	0.51372	0.487595	0.640339	0.567712	0.632885	0.478768	0.526726	0.705139	0.509465	0.592397														0.557535	0.0863535
29.1815	0.715599	0.715599	0.615831	0.481123	0.616698	0.633283	0.609792	0.552903	0.512382	0.389979	0.380501	0.492771	0.513739	0.39459	0.635024	0.440319	0.546109	0.606035	0.615373	0.553683	0.624252	0.528158	0.506286	0.629716	0.549058	0.618061	0.463693	0.571937	0.709658	0.544007	0.59835														0.560145	0.0897367
29.3914	0.732306	0.732306	0.625141	0.521814	0.607397	0.627767	0.646052	0.560482	0.51337	0.421365	0.416375	0.49297	0.572418	0.40424	0.68925	0.430282	0.539114	0.599208	0.655322	0.620324	0.634474	0.513866	0.46807	0.636834	0.571721	0.639722	0.493359	0.500519	0.670908	0.551458	0.586422														0.570157	0.090344
29.6013	0.687526	0.687526	0.609254	0.601785	0.634446	0.636184	0.636594	0.544267	0.514667	0.401287	0.394314	0.489876	0.539234	0.39301	0.65728	0.447344	0.515112	0.580156	0.615211	0.605959	0.646475	0.516928	0.455025	0.671651	0.576781	0.614225	0.456623	0.512973	0.685307	0.521529	0.614649														0.563329	0.0895525
29.8113	0.690112	0.690112	0.613555	0.551417	0.642015	0.654264	0.643687	0.543231	0.479491	0.408973	0.419611	0.502673	0.567052	0.38456	0.652511	0.448443	0.560781	0.600663	0.581754	0.531832	0.602526	0.486503	0.449487	0.611775	0.577037	0.590789	0.48265	0.548112	0.68913	0.537899	0.586915														0.559018	0.084471
30.0212	0.705064	0.705064	0.655769	0.495684	0.607638	0.629649	0.582972	0.551394	0.505389	0.400696	0.40404	0.493238	0.477211	0.42424	0.656773	0.490517	0.558175	0.574498	0.574757	0.541763	0.638839	0.491335	0.498127	0.63824	0.546324	0.600285	0.445794	0.533075	0.707186	0.532482	0.588139														0.556592	0.085598
30.2311	0.734823	0.734823	0.615479	0.508247	0.600639	0.617695	0.57583	0.546266	0.470425	0.396871	0.406172	0.465818	0.497605	0.40606	0.737368	0.464439	0.534959	0.550191	0.591031	0.570997	0.607514	0.503345	0.506853	0.626783	0.580792	0.61419	0.437824	0.510448	0.68655	0.522004	0.602242														0.555622	0.0933829
30.4411	0.714043	0.714043	0.636859	0.537116	0.631126	0.653855	0.614877	0.545074	0.515231	0.405113	0.385335	0.477197	0.515404	0.40736	0.64771	0.478829	0.558925	0.60788	0.55883	0.567573	0.627785	0.505771	0.482751	0.651345	0.571742	0.59491	0.448001	0.50884	0.714418	0.555479	0.616201														0.562891	0.0897034
30.651	0.748232	0.748232	0.62322	0.49776	0.605176	0.680498	0.584824	0.54404	0.499166	0.415732	0.408842	0.490179	0.560206	0.36871	0.681787	0.464348	0.555429	0.574235	0.591644	0.541986	0.625778	0.488025	0.466344	0.661738	0.515535	0.626084	0.442653	0.522286	0.680198	0.524974	0.580721														0.558664	0.0960451
30.861	0.693922	0.693922	0.622596	0.517752	0.613348	0.674125	0.606987	0.531139	0.501999	0.426418	0.429709	0.488594	0.583248	0.38338	0.666014	0.4626	0.582301	0.635643	0.629542	0.589072	0.588582	0.489643	0.455244	0.6756	0.550971	0.618046	0.451949	0.53843	0.72831	0.539384	0.579451														0.566062	0.0897806
31.0709	0.712866	0.712866	0.589059	0.507308	0.611063	0.672816	0.563329	0.552058	0.490427	0.408184	0.408182	0.491749	0.556041	0.4032	0.720064	0.476714	0.586585	0.632037	0.603343	0.628574	0.592361	0.549473	0.444752	0.633089	0.541338	0.613097	0.463249	0.561012	0.657187	0.543938	0.584793														0.564863	0.0881086
31.2808	0.700024	0.700024	0.660145	0.482252	0.59786	0.613114	0.575724	0.547908	0.517941	0.425293	0.410808	0.473318	0.545647	0.38461	0.642691	0.463249	0.591265	0.622089	0.602538	0.683563	0.648085	0.520246	0.481254	0.625547	0.571423	0.598999	0.455934	0.514168	0.68925	0.539522	0.619051														0.56463	0.0881408

## Sheet: Control1
Time	Control 1	Control 2	Control 3	Control 4	Control 5	Control 6	Control 7	Control 8	Control 9	Control 10	Control 11	Control 12	Control 13	Control 14	Control 15 (B)	Control 16	Control 17	Control 18	Control 19	Control 20	Control 21	Control 22	Control 23	Control 24	Control 25	Control 26	Control 27									Average	St. Dev
0	1.00753	1.00279	0.978375	0.911316	0.989375	1.00297	1.00288	1.03302	0.984733	0.994355	1.01095	1.0013	0.97414	0.99911	1.00356	0.976022	1.0086	1.02334	0.989964	1.00184	1.0211	1.00426	0.996408	1.03535	0.998786	0.966876	1.01219									0.997449	0.0238437
0.2096	1.02814	1.00155	0.995964	1.01963	1.00577	0.993899	1.03646	1.02358	1.00102	1.01178	1.00065	1.00973	1.01638	0.998644	1.00946	1.03184	0.964435	0.972057	0.984706	0.983423	1.01022	0.98381	1.02148	1.02461	0.979334	1.00525	0.993951									1.00399	0.0184071
0.4192	0.965027	1.03611	1.01251	1.03225	1.03179	1.00917	0.953627	0.976832	1.0234	0.970244	0.991861	1.00332	1.00599	0.97209	0.986423	1.0086	0.971556	1.00749	1.01808	0.993418	1.01111	0.989584	1.01259	0.982984	0.996402	1.01411	0.99183									0.99883	0.0217026
0.6287	0.999952	0.969743	1.04033	1.03274	0.98956	0.997741	0.971922	0.966334	0.981271	1.0149	0.994654	1.00725	1.00869	1.00395	1.0149	0.989268	1.05224	1.00751	1.0064	0.997685	0.962047	1.00982	0.965106	0.983838	1.02015	1.00101	0.992782									0.999325	0.0223828
0.8383	0.999636	0.989735	0.973742	1.00645	0.984622	0.996397	1.03732	1.00111	1.00987	1.00962	1.0019	0.978545	0.995244	1.02691	0.98596	0.994877	1.00684	0.990251	1.0008	1.02367	0.99673	1.01309	1.00536	0.973079	1.00563	1.01331	1.00942									1.00111	0.0151985
1.0479	0	0	0	0	0	0	0	0	0	0	0	0	0	0	0	0	0	0	0	0	0	0	0	0	0	0	0									0	0
1.2575	0.145129	0.153842	0.063741	0.138899	0.130248	0.124086	0.122126	0.103731	0.130436	0.13662	0.146467	0.156206	0.144946	0.059353	0.150183	0.174315	0.069904	0.22502	0.171324	0.119139	0.1775	0.121052	0.060994	0.140619	0.133039	0.186551	0.139987									0.134276	0.0387951
1.4671	0.217316	0.215155	0.177939	0.226667	0.211625	0.235299	0.150639	0.158737	0.187695	0.198273	0.218546	0.233941	0.228378	0.129588	0.220048	0.264948	0.158384	0.321964	0.269307	0.228413	0.282144	0.216557	0.121059	0.229586	0.22197	0.322644	0.244391									0.218193	0.049686
1.6766	0.28829	0.278171	0.196847	0.260599	0.264238	0.250425	0.259048	0.222507	0.262674	0.271593	0.309101	0.305599	0.295516	0.164068	0.29169	0.342848	0.200678	0.404448	0.332938	0.283041	0.330603	0.266098	0.164335	0.298622	0.281687	0.416975	0.320996									0.280135	0.0599314
1.8862	0.341647	0.295965	0.249546	0.340624	0.318262	0.305965	0.270326	0.309876	0.311751	0.335336	0.312803	0.358433	0.362981	0.201338	0.336191	0.412993	0.255492	0.425693	0.395739	0.336617	0.391807	0.329062	0.205192	0.337212	0.313232	0.480092	0.361362									0.329464	0.0622968
2.0958	0.390094	0.327261	0.268597	0.370073	0.356455	0.359299	0.331587	0.334066	0.35338	0.346797	0.372787	0.412563	0.396213	0.231765	0.388087	0.428642	0.274975	0.49331	0.439773	0.381455	0.431985	0.372527	0.241108	0.384332	0.349152	0.465612	0.424417									0.367641	0.0632646
2.3054	0.382821	0.352213	0.295419	0.428088	0.348272	0.367115	0.352096	0.34738	0.407213	0.402403	0.415217	0.408713	0.425378	0.258692	0.387784	0.454281	0.328677	0.537023	0.510247	0.429862	0.468733	0.415027	0.280247	0.414618	0.372978	0.521155	0.463359									0.399074	0.0687838
2.515	0.423431	0.420513	0.341273	0.501218	0.406328	0.381765	0.392814	0.381739	0.419409	0.436868	0.458361	0.43848	0.481088	0.271332	0.411041	0.507186	0.333463	0.573722	0.523607	0.455313	0.49309	0.457632	0.317784	0.44401	0.375272	0.519254	0.507909									0.432367	0.0703305
2.7245	0.462151	0.433841	0.363032	0.490229	0.430948	0.420624	0.391315	0.427291	0.444413	0.461625	0.504067	0.459928	0.499847	0.292902	0.427828	0.507913	0.347282	0.589889	0.576017	0.49365	0.531519	0.481618	0.344018	0.483915	0.437475	0.579388	0.508758									0.458944	0.0720839
2.9341	0.508728	0.471657	0.372843	0.483886	0.467872	0.452573	0.475787	0.436649	0.467554	0.458902	0.513062	0.478716	0.530676	0.322825	0.457114	0.547944	0.375602	0.631619	0.570348	0.537351	0.521882	0.512236	0.372225	0.481919	0.46827	0.618098	0.539283									0.484282	0.0710567
3.1437	0.507713	0.483449	0.379814	0.525258	0.454474	0.468286	0.4206	0.44214	0.463193	0.474562	0.541044	0.491525	0.513863	0.337104	0.468917	0.558654	0.401774	0.606217	0.602218	0.556982	0.555245	0.502475	0.401509	0.504413	0.498407	0.601656	0.536741									0.492527	0.0681122
3.3533	0.525303	0.491078	0.410061	0.563827	0.477176	0.496927	0.478114	0.484335	0.480625	0.519919	0.559476	0.517687	0.560317	0.360919	0.500695	0.572547	0.419847	0.641994	0.644499	0.570739	0.565908	0.526892	0.430874	0.535106	0.483662	0.622967	0.591878									0.519755	0.0690169
3.5629	0.522445	0.538301	0.423182	0.605382	0.48809	0.522094	0.444453	0.531295	0.488559	0.531893	0.555639	0.540257	0.577801	0.387036	0.517156	0.572474	0.435285	0.673806	0.645752	0.603182	0.565436	0.556121	0.448532	0.557009	0.498684	0.637552	0.577647									0.535002	0.0694445
3.7724	0.584744	0.513045	0.393299	0.543839	0.496193	0.536099	0.49398	0.518272	0.511753	0.548711	0.571949	0.526074	0.58307	0.391685	0.516922	0.600981	0.464137	0.683372	0.665031	0.596088	0.587153	0.610541	0.460099	0.581722	0.509071	0.692467	0.598549									0.547365	0.0748231
3.982	0.545811	0.543272	0.431073	0.641135	0.547848	0.554582	0.470825	0.534972	0.50682	0.547963	0.590608	0.588798	0.63171	0.417819	0.552571	0.634644	0.472173	0.71605	0.656136	0.607247	0.61604	0.594566	0.485503	0.579124	0.532382	0.653742	0.618269									0.565618	0.0718036
4.1916	0.577286	0.563559	0.461089	0.625116	0.529113	0.520337	0.480069	0.590088	0.539403	0.557508	0.61012	0.578852	0.640045	0.458429	0.556116	0.613405	0.515282	0.724758	0.677623	0.641388	0.610356	0.589412	0.488955	0.552972	0.52244	0.64592	0.608931									0.57328	0.0655075
4.4012	0.592921	0.587409	0.464118	0.590069	0.586165	0.528043	0.554647	0.550118	0.562584	0.555127	0.608837	0.590421	0.625265	0.440587	0.557081	0.62692	0.488958	0.738531	0.708113	0.633883	0.617456	0.644499	0.501508	0.580396	0.512858	0.688453	0.64081									0.584288	0.0701733
4.6108	0.586502	0.597705	0.497151	0.612079	0.56846	0.611448	0.504615	0.570706	0.562114	0.595558	0.617614	0.60113	0.614064	0.45677	0.572215	0.612808	0.523398	0.742638	0.699174	0.654115	0.622129	0.648389	0.53398	0.595495	0.57486	0.640843	0.62694									0.594181	0.0600347
4.8203	0.580314	0.620577	0.48608	0.587171	0.578532	0.523992	0.544912	0.574236	0.584684	0.561482	0.608803	0.586372	0.67445	0.471284	0.560235	0.662405	0.527865	0.730853	0.723369	0.649877	0.614993	0.63608	0.545623	0.581036	0.56149	0.662706	0.604123									0.594205	0.0628979
5.0299	0.626358	0.594452	0.488158	0.616411	0.575231	0.610072	0.571424	0.644913	0.605288	0.577958	0.64765	0.604554	0.685372	0.490897	0.562378	0.64802	0.549554	0.739748	0.718313	0.668135	0.626683	0.671082	0.560358	0.592306	0.578993	0.71252	0.686682									0.616797	0.0632087
5.2395	0.614228	0.601294	0.485876	0.67468	0.608325	0.590038	0.531051	0.621747	0.609594	0.621207	0.620824	0.611568	0.691519	0.48788	0.590263	0.666582	0.550428	0.740217	0.718651	0.695394	0.652144	0.655514	0.557134	0.586595	0.590969	0.682583	0.666956									0.61938	0.0635921
5.4491	0.633626	0.613301	0.489117	0.622751	0.63974	0.561118	0.578229	0.608426	0.592107	0.578225	0.662328	0.618384	0.678876	0.489539	0.570276	0.652824	0.551683	0.752403	0.731448	0.693658	0.650304	0.664588	0.58253	0.599024	0.62793	0.73314	0.673839									0.624052	0.0655072
5.6587	0.65137	0.592124	0.493766	0.636329	0.60098	0.579267	0.543279	0.604337	0.626682	0.632712	0.660042	0.626459	0.700369	0.493034	0.604504	0.682586	0.563075	0.756714	0.735801	0.726048	0.67156	0.664599	0.589574	0.600265	0.633866	0.697813	0.684666									0.631549	0.0662399
5.8682	0.668792	0.635708	0.51279	0.655603	0.619207	0.588646	0.545766	0.643671	0.598098	0.627084	0.69156	0.619396	0.70986	0.516209	0.598531	0.71328	0.574391	0.743323	0.738293	0.732799	0.657058	0.692809	0.596014	0.63448	0.675199	0.706986	0.684264									0.643697	0.0641965
6.0778	0.627128	0.654451	0.535651	0.63719	0.628938	0.598919	0.584496	0.652651	0.60271	0.636426	0.696393	0.648435	0.701372	0.51956	0.616664	0.693066	0.589081	0.779614	0.744851	0.742036	0.660643	0.693982	0.607866	0.635277	0.634831	0.753702	0.668496									0.649794	0.0625335
6.2874	0.636944	0.637047	0.554101	0.602199	0.635344	0.610647	0.59246	0.631526	0.585872	0.633935	0.705669	0.646363	0.723519	0.526957	0.617215	0.716641	0.599347	0.828528	0.774707	0.729363	0.658256	0.706299	0.613994	0.633043	0.639592	0.723707	0.660577									0.652735	0.0671793
6.497	0.635706	0.688545	0.545806	0.639749	0.624564	0.631987	0.588439	0.616759	0.612699	0.637745	0.674879	0.642835	0.725092	0.515929	0.609682	0.730867	0.611842	0.827419	0.790685	0.754555	0.668222	0.737064	0.610444	0.664418	0.677011	0.740284	0.666168									0.661829	0.0710402
6.7066	0.649602	0.676061	0.563878	0.663885	0.637133	0.592942	0.600393	0.642946	0.607443	0.675523	0.669668	0.654877	0.715706	0.523644	0.623087	0.697248	0.604324	0.847249	0.768619	0.72949	0.694035	0.719456	0.627827	0.653583	0.671306	0.774906	0.676266									0.665226	0.0677865
6.9161	0.663678	0.701857	0.55928	0.629911	0.657527	0.59074	0.575093	0.675836	0.59775	0.663172	0.698766	0.647595	0.755442	0.536079	0.632522	0.727136	0.580062	0.865768	0.816116	0.769133	0.656891	0.74794	0.642196	0.680788	0.713674	0.70698	0.705893									0.673994	0.0774001
7.1257	0.644758	0.653433	0.553997	0.668893	0.671926	0.598634	0.62184	0.612267	0.627196	0.667996	0.724082	0.645258	0.757565	0.543499	0.620574	0.737123	0.615698	0.848975	0.76196	0.738365	0.691485	0.748676	0.629873	0.68695	0.691717	0.702457	0.691639									0.672475	0.0678229
7.3353	0.677472	0.658476	0.538199	0.643892	0.665974	0.692577	0.626148	0.659859	0.630918	0.683608	0.689347	0.661123	0.760831	0.562583	0.651295	0.731431	0.611956	0.861423	0.812778	0.753004	0.706114	0.759884	0.632509	0.68229	0.639963	0.758501	0.712048									0.683859	0.0708235
7.5449	0.669789	0.689891	0.544614	0.610264	0.65768	0.660927	0.654465	0.637512	0.62111	0.68284	0.71556	0.6627	0.740032	0.560293	0.640883	0.707667	0.62979	0.855721	0.820536	0.787072	0.698198	0.728859	0.665555	0.651319	0.685515	0.773724	0.716696									0.684045	0.0707285
7.7545	0.680233	0.689369	0.597439	0.668759	0.675314	0.621762	0.634709	0.68985	0.619097	0.683189	0.664351	0.665056	0.727788	0.560712	0.647574	0.725299	0.633516	0.810959	0.785545	0.768871	0.699221	0.772621	0.65356	0.687883	0.682992	0.752568	0.726553									0.686103	0.0591255
7.964	0.690363	0.715611	0.581659	0.679718	0.673023	0.651859	0.61603	0.695954	0.593396	0.680011	0.707409	0.67439	0.732568	0.583581	0.664787	0.713883	0.601295	0.835128	0.820636	0.777323	0.685763	0.774169	0.669567	0.682359	0.69549	0.73911	0.719779									0.690921	0.0646224
8.1736	0.720645	0.689404	0.625472	0.729641	0.718558	0.645794	0.607727	0.657257	0.60014	0.670406	0.699511	0.690185	0.756882	0.57334	0.668598	0.746528	0.640317	0.852591	0.810997	0.778147	0.689584	0.783087	0.680342	0.672477	0.691932	0.733261	0.723768									0.698392	0.0647673
8.3832	0.706013	0.679927	0.628197	0.694722	0.677645	0.677369	0.621248	0.652767	0.600988	0.713079	0.680886	0.712576	0.746219	0.580276	0.676251	0.711217	0.6322	0.871824	0.826335	0.786072	0.724886	0.78849	0.674677	0.6934	0.646352	0.739342	0.742155									0.699449	0.0666633
8.5928	0.721624	0.680447	0.65591	0.709684	0.691336	0.67123	0.6884	0.708334	0.58937	0.671009	0.714841	0.704831	0.759967	0.586063	0.663652	0.756036	0.654989	0.888478	0.817597	0.823222	0.693484	0.763989	0.686402	0.711956	0.671845	0.746712	0.761672									0.710855	0.0659198
8.8023	0.692602	0.68626	0.625309	0.740714	0.714816	0.676501	0.650505	0.678853	0.615397	0.723403	0.68421	0.714929	0.800469	0.595837	0.65898	0.795475	0.641206	0.897899	0.855044	0.802833	0.727322	0.779438	0.713133	0.736824	0.678379	0.733156	0.745856									0.717235	0.0713972
9.0119	0.694995	0.718152	0.624804	0.752111	0.702903	0.666369	0.668285	0.689155	0.632011	0.71195	0.718347	0.736143	0.742153	0.613824	0.693728	0.741763	0.66597	0.868275	0.864207	0.811944	0.730057	0.783727	0.695543	0.698399	0.681804	0.730593	0.71326									0.716684	0.0617736
9.2215	0.733632	0.688515	0.651596	0.759305	0.688143	0.713647	0.676122	0.706558	0.651248	0.765911	0.691008	0.726004	0.796451	0.625502	0.689974	0.782519	0.668859	0.828752	0.841623	0.817707	0.746657	0.785153	0.724765	0.722638	0.672599	0.716414	0.785454									0.728028	0.0576557
9.4311	0.686292	0.717764	0.653641	0.812243	0.720125	0.732639	0.674969	0.644377	0.625573	0.759443	0.65878	0.72031	0.775518	0.611575	0.647148	0.78258	0.638653	0.860852	0.840542	0.803376	0.740061	0.779666	0.723826	0.732575	0.700858	0.735053	0.745238									0.723099	0.0660089
9.6407	0.778458	0.742277	0.69457	0.788902	0.724492	0.711862	0.674329	0.687508	0.605528	0.724177	0.70906	0.750817	0.78126	0.598847	0.665939	0.771473	0.639733	0.897387	0.828399	0.835308	0.756721	0.802352	0.714047	0.737723	0.667462	0.742852	0.755949									0.732868	0.0685757
9.8502	0.710519	0.69492	0.645874	0.784109	0.688918	0.72144	0.659842	0.649963	0.613267	0.74243	0.684542	0.733463	0.785809	0.607815	0.685463	0.768386	0.645171	0.861584	0.817439	0.818307	0.735692	0.788353	0.739895	0.739238	0.710469	0.761717	0.788138									0.725288	0.0649873
10.0598	0.751947	0.76232	0.681671	0.769797	0.71041	0.701651	0.636592	0.719963	0.637363	0.741307	0.65642	0.743732	0.761353	0.62063	0.694682	0.763131	0.668413	0.885295	0.837762	0.810553	0.729699	0.802352	0.723617	0.746705	0.67544	0.755959	0.765538									0.731641	0.0624707
10.2694	0.754272	0.711957	0.651576	0.776535	0.722789	0.702252	0.660457	0.694947	0.620559	0.783599	0.716244	0.759963	0.820357	0.629321	0.710617	0.785716	0.68289	0.922242	0.842021	0.790661	0.756162	0.796331	0.722632	0.731338	0.691291	0.833791	0.80484									0.743532	0.0699748
10.479	0.74281	0.712103	0.666185	0.770683	0.697715	0.710343	0.619981	0.693258	0.592993	0.741071	0.722836	0.749488	0.79977	0.64617	0.684679	0.793732	0.704447	0.875433	0.820062	0.804808	0.736638	0.801517	0.73892	0.750001	0.694988	0.793121	0.801773									0.73576	0.0647615
10.6886	0.759151	0.712582	0.664413	0.779295	0.735935	0.693749	0.606115	0.764496	0.598556	0.724518	0.703471	0.735677	0.772851	0.654296	0.680645	0.773865	0.695764	0.95642	0.831596	0.799556	0.756333	0.802494	0.74666	0.779453	0.669739	0.838997	0.797457									0.742003	0.0754944
10.8981	0.766022	0.681839	0.662317	0.789537	0.719196	0.742105	0.661173	0.701948	0.615677	0.736083	0.724614	0.754525	0.765053	0.637264	0.712083	0.758481	0.680878	0.928497	0.840332	0.818951	0.725301	0.822528	0.760638	0.787391	0.685837	0.815776	0.750989									0.742409	0.0686503
11.1077	0.746775	0.695377	0.644762	0.764378	0.720163	0.756124	0.643559	0.733307	0.657312	0.754796	0.738895	0.749508	0.759002	0.656577	0.690004	0.756764	0.673707	0.911774	0.823366	0.82877	0.769036	0.820575	0.772568	0.74641	0.688812	0.79582	0.811843									0.744814	0.0639681
11.3173	0.756681	0.707963	0.66884	0.824852	0.755848	0.708857	0.643514	0.67765	0.617144	0.746986	0.732983	0.744222	0.770533	0.613774	0.673181	0.803388	0.671703	0.918207	0.828298	0.823502	0.784212	0.810315	0.774136	0.760156	0.70682	0.79911	0.79368									0.745058	0.0720554
11.5269	0.757572	0.71388	0.64861	0.754605	0.710435	0.703121	0.662644	0.682218	0.627082	0.713503	0.747852	0.769224	0.780619	0.65568	0.701459	0.790161	0.686933	0.873079	0.822059	0.819968	0.761396	0.823064	0.778914	0.756144	0.654411	0.824428	0.783924									0.740851	0.064269
11.7365	0.804783	0.735922	0.64953	0.800977	0.721358	0.691873	0.660588	0.696814	0.608569	0.730924	0.703254	0.776948	0.77223	0.644556	0.685392	0.773257	0.672879	0.902638	0.786389	0.843247	0.763659	0.818258	0.757639	0.759794	0.641198	0.781581	0.75609									0.738531	0.0690893
11.946	0.766897	0.717753	0.721532	0.785828	0.735489	0.709476	0.667203	0.68256	0.635465	0.741783	0.717407	0.774065	0.785469	0.647911	0.691359	0.800946	0.679607	0.8841	0.814765	0.827019	0.772632	0.812836	0.761649	0.75831	0.652556	0.798678	0.810014									0.746419	0.0626552
12.1556	0.783029	0.712712	0.673337	0.784191	0.720301	0.684803	0.651777	0.699506	0.6401	0.769752	0.707824	0.758359	0.781888	0.670054	0.672415	0.786345	0.69191	0.84808	0.815384	0.820597	0.764164	0.808629	0.764098	0.766073	0.687754	0.813114	0.828284									0.74461	0.0605974
12.3652	0.784775	0.729226	0.726262	0.77295	0.730696	0.709677	0.610263	0.70587	0.658265	0.73227	0.723672	0.77603	0.791624	0.661995	0.687577	0.816351	0.682262	0.867983	0.784751	0.824487	0.747572	0.818237	0.766598	0.799002	0.642633	0.832482	0.767739									0.746343	0.0635392
12.5748	0.81682	0.692066	0.667646	0.851944	0.691206	0.687687	0.650604	0.707302	0.653498	0.717057	0.727035	0.778621	0.783268	0.674519	0.69289	0.793824	0.712301	0.90313	0.796787	0.850401	0.762406	0.820269	0.781947	0.751772	0.674461	0.822273	0.79592									0.750283	0.0690763
12.7844	0.753401	0.696579	0.706342	0.804946	0.715395	0.714521	0.686162	0.736612	0.648094	0.7573	0.688644	0.801272	0.764171	0.681706	0.691801	0.7474	0.734993	0.907737	0.795242	0.855248	0.762318	0.820118	0.772162	0.783355	0.709539	0.835732	0.788478									0.754047	0.0602939
12.9939	0.770199	0.669908	0.681191	0.786161	0.710473	0.721663	0.6758	0.705152	0.659819	0.767067	0.693639	0.77271	0.802288	0.668707	0.683438	0.807665	0.705708	0.860508	0.796891	0.847047	0.758824	0.831286	0.786824	0.789241	0.732593	0.787817	0.804478									0.751004	0.0594874
13.2035	0.761499	0.777012	0.674607	0.866538	0.708824	0.682357	0.611728	0.687684	0.616424	0.77219	0.708099	0.768732	0.783591	0.667387	0.693352	0.789313	0.718536	0.90737	0.791958	0.871193	0.753661	0.82278	0.780034	0.729364	0.705542	0.840073	0.831626									0.752647	0.0754359
13.4131	0.710763	0.729257	0.654569	0.735661	0.749837	0.742759	0.697785	0.686463	0.638369	0.79158	0.725194	0.766976	0.816098	0.673749	0.667833	0.828051	0.718381	0.908676	0.780854	0.844616	0.758027	0.817132	0.782635	0.745283	0.749226	0.797392	0.822521									0.753322	0.0635995
13.6227	0.749754	0.715841	0.706459	0.734022	0.76643	0.714799	0.690449	0.713779	0.66315	0.762114	0.738227	0.746533	0.805516	0.691668	0.665939	0.810541	0.723572	0.870948	0.778093	0.860631	0.772685	0.855796	0.798377	0.765263	0.732228	0.823788	0.81398									0.75817	0.0573215
13.8323	0.750485	0.778251	0.716092	0.769777	0.771936	0.696496	0.678763	0.703821	0.634474	0.803001	0.728015	0.773275	0.838282	0.671011	0.686303	0.849263	0.724642	0.799534	0.772499	0.89026	0.765148	0.812287	0.774742	0.791622	0.696644	0.826997	0.818363									0.760073	0.0615357
14.0418	0.766099	0.758968	0.725083	0.800839	0.7413	0.734217	0.671366	0.683094	0.619244	0.818318	0.715862	0.747709	0.834926	0.673154	0.679762	0.813484	0.708897	0.836772	0.783159	0.905471	0.767049	0.848321	0.788455	0.768038	0.719747	0.805007	0.859761									0.762004	0.0673383
14.2514	0.776079	0.706423	0.713034	0.828107	0.736137	0.718622	0.665589	0.675853	0.624844	0.800829	0.687258	0.778495	0.814597	0.65969	0.684937	0.801481	0.673972	0.831345	0.802227	0.870139	0.769298	0.825892	0.787423	0.812917	0.756813	0.786213	0.839658									0.756588	0.0666011
14.461	0.744035	0.728609	0.669592	0.806935	0.737589	0.732092	0.711304	0.700118	0.637886	0.817175	0.720315	0.780371	0.838411	0.690128	0.681984	0.833119	0.731595	0.800711	0.784626	0.879971	0.766468	0.844653	0.795777	0.800765	0.729813	0.822217	0.804151									0.762608	0.0606536
14.6706	0.782569	0.728943	0.718399	0.814979	0.782544	0.715384	0.749188	0.700898	0.625161	0.827446	0.681264	0.792191	0.833142	0.697831	0.705629	0.80932	0.715049	0.77381	0.785154	0.879114	0.783968	0.835975	0.780139	0.808305	0.731041	0.810502	0.831844									0.766659	0.0589579
14.8802	0.77573	0.737944	0.737959	0.80688	0.796624	0.739408	0.671769	0.744411	0.611647	0.821186	0.69801	0.776301	0.83791	0.67487	0.684434	0.826278	0.696178	0.764619	0.807766	0.828623	0.783521	0.820682	0.802664	0.789644	0.744486	0.794579	0.816786									0.762626	0.0585025
15.0897	0.736163	0.713447	0.720267	0.873272	0.73906	0.689369	0.731595	0.679569	0.614398	0.812521	0.720656	0.809093	0.836913	0.698412	0.693904	0.827015	0.737631	0.778168	0.809433	0.89085	0.778067	0.819751	0.776235	0.78317	0.747425	0.833479	0.828613									0.765869	0.0652688
15.2993	0.82478	0.727103	0.644068	0.824458	0.784151	0.705119	0.748427	0.698587	0.598353	0.795885	0.717452	0.826858	0.845991	0.713651	0.705905	0.820048	0.759553	0.766942	0.828835	0.892118	0.797315	0.823726	0.79581	0.805767	0.78625	0.786721	0.82464									0.772167	0.065868
15.5089	0.811408	0.726486	0.684915	0.864123	0.765943	0.737559	0.755901	0.7382	0.622073	0.820733	0.715624	0.814081	0.838709	0.702594	0.702399	0.796469	0.74311	0.747904	0.817192	0.895775	0.795267	0.81191	0.807802	0.789997	0.757599	0.774164	0.82627									0.772748	0.0596437
15.7185	0.799827	0.717654	0.733605	0.799312	0.741069	0.729083	0.742057	0.741125	0.613567	0.804507	0.722802	0.800591	0.869474	0.716016	0.690786	0.826076	0.764407	0.784355	0.810343	0.888765	0.79439	0.838592	0.787255	0.808085	0.757856	0.838806	0.815453									0.775402	0.0588908
15.9281	0.824996	0.666771	0.690449	0.823285	0.734571	0.747944	0.761465	0.675083	0.62069	0.801878	0.740649	0.806155	0.824916	0.691518	0.68437	0.802052	0.724833	0.805583	0.833123	0.889221	0.790567	0.811919	0.806617	0.81907	0.760942	0.820508	0.801267									0.768905	0.0643599
16.1376	0.804496	0.686399	0.777711	0.847097	0.761577	0.718788	0.787692	0.691651	0.596508	0.811829	0.725862	0.837533	0.859087	0.689336	0.700283	0.796848	0.737329	0.840405	0.804933	0.885629	0.809532	0.823784	0.788836	0.834179	0.735193	0.835396	0.811368									0.777751	0.0670337
16.3472	0.738057	0.676584	0.741665	0.833493	0.760448	0.717514	0.716229	0.725798	0.589697	0.870982	0.731558	0.807081	0.843781	0.694289	0.698877	0.781997	0.733895	0.861427	0.817702	0.903541	0.802638	0.804159	0.808562	0.794622	0.776298	0.817363	0.783431									0.771544	0.068136
16.5568	0.77949	0.66655	0.711126	0.831107	0.729371	0.71949	0.779541	0.734311	0.617362	0.863525	0.727642	0.802813	0.852189	0.67964	0.710251	0.780259	0.723036	0.884142	0.818132	0.874072	0.831686	0.838397	0.813662	0.791859	0.770395	0.828256	0.798225									0.776168	0.0677901
16.7664	0.7395	0.697271	0.677403	0.800431	0.738148	0.733207	0.720493	0.77012	0.615199	0.869487	0.718748	0.789485	0.836049	0.674341	0.698101	0.789015	0.695133	0.801103	0.821368	0.864176	0.834804	0.862788	0.803095	0.827104	0.783559	0.841927	0.808344									0.770756	0.0675131
16.976	0.727268	0.678797	0.713014	0.855029	0.752334	0.705419	0.735142	0.664575	0.627483	0.877179	0.707742	0.80442	0.837349	0.707052	0.725306	0.783034	0.710331	0.89893	0.805492	0.872807	0.788817	0.833122	0.798217	0.819301	0.762995	0.893473	0.810594									0.773897	0.0736595
17.1855	0.785241	0.723053	0.730879	0.77187	0.766723	0.738657	0.721981	0.716216	0.625185	0.84922	0.696262	0.817718	0.871334	0.692012	0.70841	0.800767	0.734233	0.886613	0.829017	0.868762	0.853333	0.876452	0.811613	0.828164	0.74618	0.837306	0.777114									0.78016	0.0679596
17.3951	0.780515	0.732131	0.735261	0.846123	0.715635	0.732746	0.791258	0.701399	0.614516	0.832306	0.702217	0.795846	0.895885	0.684088	0.693372	0.815083	0.753898	0.846434	0.817068	0.861111	0.829682	0.86186	0.823851	0.837842	0.718488	0.822333	0.784356									0.778715	0.0685476
17.6047	0.788585	0.735011	0.742124	0.801184	0.789929	0.712408	0.719013	0.716335	0.603589	0.815387	0.720308	0.831827	0.869946	0.705298	0.706661	0.806684	0.761815	0.800195	0.822745	0.917412	0.805153	0.858395	0.83184	0.860765	0.759474	0.836474	0.79002									0.781799	0.0667558
17.8143	0.791	0.741394	0.773807	0.814034	0.773557	0.747935	0.722403	0.700551	0.626189	0.81236	0.719841	0.761385	0.864722	0.688924	0.688661	0.813956	0.723581	0.82344	0.827554	0.905293	0.855044	0.868977	0.826778	0.820028	0.749626	0.869549	0.810926									0.782278	0.0671603
18.0239	0.757348	0.689927	0.732879	0.841155	0.760024	0.739675	0.70503	0.703535	0.625809	0.80227	0.698407	0.769571	0.862687	0.694183	0.665725	0.807615	0.746046	0.82785	0.810303	0.876205	0.845821	0.857208	0.810566	0.803242	0.773441	0.867064	0.796344									0.77296	0.0676744
18.2334	0.816612	0.694055	0.764549	0.867643	0.725758	0.687588	0.717387	0.687821	0.613382	0.818931	0.703483	0.782828	0.860732	0.724068	0.673973	0.820816	0.779803	0.821558	0.8382	0.908524	0.833689	0.862171	0.801747	0.856604	0.738791	0.827282	0.859929									0.781034	0.0749724
18.443	0.78738	0.702326	0.746685	0.82588	0.747165	0.708485	0.687239	0.717473	0.630002	0.868839	0.77783	0.762535	0.89192	0.722862	0.689727	0.853908	0.760004	0.792403	0.798808	0.939367	0.856367	0.87793	0.830376	0.857635	0.781629	0.797171	0.855968									0.787701	0.0741291
18.6526	0.841157	0.716914	0.720922	0.799429	0.763986	0.73798	0.705753	0.711834	0.639007	0.812516	0.771451	0.725059	0.865757	0.677327	0.672786	0.819943	0.696762	0.815262	0.818073	0.908927	0.817217	0.869964	0.817868	0.85556	0.80422	0.830703	0.823138									0.779241	0.0697941
18.8622	0.778398	0.698192	0.72518	0.874341	0.769533	0.760822	0.739249	0.722931	0.618794	0.837216	0.691583	0.752383	0.876242	0.688195	0.686696	0.846658	0.713284	0.800149	0.801251	0.883181	0.785158	0.867254	0.820315	0.845887	0.777647	0.889163	0.841576									0.781158	0.0728315
19.0718	0.798224	0.717195	0.700675	0.763788	0.746563	0.760343	0.758378	0.713655	0.626139	0.77013	0.716837	0.738248	0.883028	0.693841	0.684174	0.867228	0.746293	0.823	0.8156	0.907144	0.817891	0.868035	0.822354	0.88231	0.785597	0.825436	0.840841									0.78048	0.0704913
19.2813	0.838345	0.712854	0.770487	0.793117	0.756366	0.770721	0.723015	0.711495	0.657526	0.775999	0.755491	0.767916	0.911405	0.701645	0.677942	0.85353	0.744527	0.826318	0.807637	0.896577	0.78752	0.857476	0.819728	0.838723	0.753579	0.864799	0.852491									0.786194	0.0658389
19.4909	0.796661	0.685632	0.701415	0.838914	0.761018	0.791713	0.770556	0.670478	0.635458	0.803618	0.699334	0.771588	0.875875	0.706241	0.697498	0.835827	0.734754	0.854365	0.811228	0.93081	0.790106	0.874566	0.801434	0.817343	0.800732	0.852079	0.841545									0.783363	0.072137
19.7005	0.81647	0.687164	0.658518	0.789975	0.734083	0.697424	0.789324	0.663631	0.635319	0.812255	0.729555	0.780168	0.873666	0.702696	0.699491	0.804445	0.730656	0.83677	0.819532	0.942094	0.794002	0.873552	0.813354	0.864211	0.800322	0.8123	0.833355									0.777568	0.0755743
19.9101	0.783019	0.73093	0.710014	0.824454	0.79345	0.732837	0.726176	0.709785	0.613121	0.799863	0.761774	0.76336	0.877708	0.716916	0.690472	0.815464	0.720046	0.785035	0.815767	0.907363	0.79356	0.883724	0.804846	0.852806	0.790699	0.818301	0.84338									0.78018	0.066435
20.1197	0.743651	0.754061	0.724032	0.86018	0.769719	0.761489	0.734457	0.736656	0.629601	0.830283	0.729883	0.75829	0.868055	0.697465	0.684555	0.834439	0.722714	0.815802	0.805893	0.898984	0.765176	0.905731	0.800425	0.845716	0.802601	0.824581	0.857189									0.783764	0.0676404
20.3292	0.745845	0.742039	0.707123	0.919195	0.743667	0.773256	0.723316	0.705631	0.610154	0.859855	0.687585	0.734833	0.895056	0.688967	0.67194	0.841468	0.714277	0.800958	0.800502	0.906181	0.791847	0.869302	0.806744	0.855076	0.769594	0.883544	0.805358									0.779752	0.0801986
20.5388	0.80181	0.728549	0.711714	0.841924	0.78295	0.749479	0.718868	0.743172	0.685543	0.805834	0.693774	0.731574	0.907234	0.719211	0.673315	0.827279	0.72229	0.807604	0.808479	0.920076	0.796056	0.860255	0.821046	0.839935	0.779552	0.818505	0.828309									0.782383	0.0652475
20.7484	0.805146	0.732752	0.700899	0.846249	0.776422	0.742146	0.711203	0.732893	0.636685	0.78333	0.6509	0.746801	0.915711	0.707207	0.671457	0.83109	0.748957	0.763572	0.833745	0.917779	0.773372	0.852823	0.813644	0.848661	0.809128	0.850467	0.867706									0.780398	0.0749709
20.958	0.754203	0.688224	0.700501	0.839592	0.746674	0.730197	0.765038	0.717208	0.621558	0.8374	0.722218	0.712148	0.895761	0.682795	0.656962	0.840528	0.717144	0.774222	0.830371	0.944457	0.820281	0.877873	0.818064	0.858135	0.768456	0.808937	0.861556									0.777426	0.0795362
21.1676	0.73776	0.73913	0.752741	0.838191	0.734154	0.720814	0.779788	0.713804	0.620531	0.828256	0.636736	0.725597	0.915165	0.68153	0.667514	0.809385	0.715035	0.73448	0.819405	0.945444	0.774815	0.884452	0.827458	0.874696	0.776926	0.810745	0.811864									0.773201	0.0804774
21.3771	0.78442	0.71965	0.71915	0.836333	0.749934	0.749365	0.769882	0.726999	0.611696	0.8484	0.685512	0.697637	0.90479	0.694167	0.659181	0.810108	0.723017	0.787335	0.830562	0.915996	0.789042	0.903649	0.829488	0.855202	0.75977	0.859947	0.85275									0.780518	0.0790242
21.5867	0.740115	0.737453	0.753378	0.845807	0.770977	0.772069	0.72044	0.721735	0.638776	0.850968	0.708611	0.708162	0.904156	0.694082	0.654643	0.816943	0.704796	0.766048	0.83027	0.935137	0.780696	0.876074	0.838042	0.864031	0.771139	0.87202	0.823081									0.781468	0.0767338
21.7963	0.749126	0.674946	0.767824	0.808808	0.785817	0.730227	0.715929	0.721405	0.608064	0.827184	0.690564	0.713015	0.898325	0.704399	0.649911	0.813	0.733208	0.807859	0.8186	0.924224	0.788401	0.868039	0.829974	0.839867	0.789635	0.851483	0.823198									0.775297	0.07612
22.0059	0.757872	0.72156	0.723077	0.870658	0.766195	0.755789	0.708147	0.718849	0.599258	0.837112	0.721187	0.685659	0.875574	0.696229	0.630406	0.792019	0.692349	0.817095	0.833095	0.951586	0.779007	0.865091	0.830715	0.830447	0.788604	0.86345	0.832121									0.775672	0.0820256
22.2155	0.725173	0.737229	0.701337	0.802716	0.777157	0.766469	0.729181	0.741013	0.617345	0.819046	0.691258	0.705105	0.87351	0.704074	0.674432	0.773485	0.69156	0.772949	0.847487	0.946055	0.804209	0.854118	0.826433	0.903181	0.763831	0.861115	0.846391									0.776143	0.0777696
22.425	0.785705	0.764401	0.714699	0.80426	0.767463	0.765259	0.800727	0.713891	0.60612	0.840372	0.692855	0.694646	0.864338	0.70433	0.661588	0.766035	0.70425	0.754617	0.811543	0.975055	0.771006	0.866433	0.829622	0.894613	0.752704	0.832472	0.884467									0.778647	0.0806352
22.6346	0.752859	0.709215	0.721165	0.796521	0.780823	0.758311	0.762299	0.747207	0.620566	0.813224	0.704208	0.724813	0.892251	0.695675	0.67167	0.798822	0.691424	0.76091	0.829176	0.977316	0.792777	0.869835	0.843073	0.91516	0.749116	0.873532	0.87578									0.782508	0.0825561
22.8442	0.786582	0.73164	0.756951	0.771501	0.786714	0.774125	0.750286	0.709559	0.628259	0.866214	0.73531	0.707986	0.906498	0.673929	0.646117	0.786306	0.694313	0.746006	0.820786	0.989311	0.797459	0.856316	0.837049	0.894535	0.716194	0.820866	0.857873									0.779581	0.0832151
23.0538	0.763807	0.761789	0.752324	0.834362	0.763163	0.793718	0.723831	0.760367	0.644378	0.852957	0.704236	0.722786	0.928896	0.699345	0.664575	0.794632	0.690469	0.754494	0.830022	0.998346	0.817773	0.852749	0.841798	0.935734	0.728022	0.844311	0.837993									0.788773	0.0843588
23.2634	0.764848	0.764217	0.709303	0.766078	0.793596	0.808764	0.775588	0.795762	0.630221	0.806065	0.714014	0.70859	0.93818	0.669073	0.650847	0.804624	0.659249	0.763791	0.795501	1.00099	0.813045	0.854076	0.83883	0.922823	0.720459	0.88595	0.81305									0.783983	0.0885623
23.4729	0.746241	0.730797	0.734542	0.766243	0.77056	0.777837	0.775495	0.783226	0.636146	0.852747	0.690707	0.746803	0.936385	0.681089	0.663313	0.849529	0.680227	0.758528	0.84553	0.988394	0.801765	0.867676	0.840218	0.912772	0.770042	0.864849	0.850954									0.789726	0.0857151
23.6825	0.749644	0.762316	0.71978	0.811464	0.778143	0.823439	0.738976	0.776878	0.629391	0.915705	0.693509	0.748028	0.917981	0.661039	0.686	0.815055	0.674165	0.819946	0.825604	0.96478	0.81175	0.8818	0.852762	0.909647	0.76494	0.910562	0.905022									0.798086	0.0896267
23.8921	0.752663	0.762274	0.727848	0.77756	0.779001	0.779642	0.690634	0.731191	0.645441	0.857395	0.679607	0.729977	0.955175	0.68926	0.681374	0.82308	0.660082	0.711436	0.833174	0.996902	0.798239	0.872752	0.840478	0.897303	0.761954	0.891938	0.856615									0.784555	0.0908953
24.1017	0.801732	0.739639	0.74334	0.807605	0.776722	0.758338	0.709944	0.732762	0.636036	0.814	0.670457	0.761136	0.950521	0.702791	0.696145	0.822851	0.685853	0.712482	0.827994	1.00021	0.784128	0.879478	0.844873	0.900213	0.768342	0.858117	0.875827									0.787464	0.0869745
24.3113	0.770802	0.75411	0.739203	0.806363	0.775469	0.752917	0.710584	0.747295	0.607922	0.891272	0.692344	0.740136	0.934403	0.696126	0.674412	0.805698	0.677643	0.724339	0.814876	0.981597	0.817739	0.889472	0.855279	0.918429	0.742596	0.894482	0.870562									0.788373	0.0916075
24.5208	0.783866	0.720074	0.729606	0.79758	0.785867	0.722486	0.775359	0.744118	0.62208	0.835773	0.664001	0.746399	0.915787	0.677416	0.676903	0.791844	0.693164	0.748102	0.831237	0.963654	0.797529	0.88431	0.848316	0.897797	0.727202	0.924347	0.872045									0.784328	0.0876409
24.7304	0.797387	0.715497	0.74346	0.808031	0.766227	0.727225	0.765608	0.739993	0.607458	0.834103	0.699943	0.742606	0.973138	0.700743	0.646012	0.825868	0.702625	0.736688	0.845947	0.985065	0.827802	0.866384	0.824042	0.935217	0.745854	0.869769	0.86805									0.788916	0.0920672
24.94	0.795661	0.734129	0.703713	0.794528	0.77529	0.737882	0.697257	0.753422	0.619944	0.850161	0.657761	0.739443	0.943927	0.684582	0.6612	0.795251	0.688319	0.778617	0.849509	0.99479	0.821157	0.873778	0.825618	0.94108	0.729792	0.851942	0.837551									0.782826	0.0927905
25.1496	0.83306	0.763558	0.722262	0.809467	0.761113	0.72545	0.694343	0.772479	0.653241	0.832106	0.651779	0.747279	0.93672	0.696108	0.674715	0.791019	0.694737	0.779978	0.846005	1.01448	0.806008	0.866982	0.827398	0.941686	0.773472	0.908479	0.883338									0.792862	0.0926355
25.3591	0.84993	0.7782	0.784441	0.79828	0.762254	0.720522	0.723734	0.780119	0.630414	0.806303	0.671721	0.737316	0.936554	0.67319	0.67466	0.79707	0.70462	0.826271	0.827919	0.993184	0.808124	0.894821	0.851137	0.924879	0.739222	0.864914	0.883397									0.794192	0.0889907
25.5687	0.772822	0.745773	0.779068	0.800779	0.783051	0.691537	0.790373	0.754444	0.62384	0.801349	0.696855	0.730683	0.941049	0.673495	0.678712	0.809824	0.691952	0.823821	0.828782	0.975484	0.82527	0.84768	0.830243	0.936335	0.764827	0.882815	0.864242									0.790559	0.0858478
25.7783	0.797017	0.67822	0.768056	0.868689	0.772945	0.71699	0.750979	0.778085	0.620832	0.832898	0.663965	0.733643	0.985831	0.689933	0.692187	0.82169	0.70983	0.76799	0.832818	0.966641	0.823318	0.846473	0.842514	0.922725	0.731953	0.886061	0.85992									0.791193	0.0913625
25.9879	0.788324	0.701837	0.779657	0.782249	0.761642	0.722771	0.694201	0.748722	0.654014	0.797138	0.717741	0.730466	0.972377	0.67099	0.689174	0.815843	0.681109	0.777636	0.839343	1.00717	0.811944	0.892455	0.857401	0.954634	0.737507	0.854722	0.858208									0.788862	0.0931318
26.1975	0.827943	0.754117	0.770791	0.885699	0.774549	0.719116	0.692835	0.712885	0.650101	0.824793	0.710788	0.734163	0.957853	0.711771	0.674399	0.812255	0.708107	0.7916	0.834962	1.01016	0.822127	0.848141	0.834693	0.972564	0.744771	0.841021	0.817333									0.794057	0.0905381
26.407	0.783775	0.762083	0.792636	0.888169	0.789228	0.742495	0.728379	0.739681	0.641184	0.838966	0.716806	0.746137	0.948961	0.714247	0.693027	0.785342	0.718023	0.791245	0.853151	0.989308	0.797204	0.848957	0.850888	0.975329	0.749635	0.860103	0.830225									0.799081	0.0849701
26.6166	0.765192	0.733005	0.807997	0.847645	0.776369	0.744861	0.747657	0.76588	0.626525	0.827614	0.689131	0.738653	0.971506	0.710659	0.687939	0.803581	0.707005	0.815754	0.819218	0.97444	0.79377	0.867578	0.860594	1.00276	0.74362	0.83756	0.839321									0.796512	0.089293
26.8262	0.798595	0.778319	0.78796	0.786826	0.804761	0.760783	0.768112	0.804862	0.656875	0.875252	0.696415	0.710414	0.941339	0.698493	0.686237	0.781006	0.702995	0.831008	0.830065	0.994146	0.814447	0.865934	0.851348	0.955761	0.80344	0.892116	0.847752									0.804639	0.08378
27.0358	0.800308	0.738608	0.799552	0.833838	0.810518	0.672023	0.749046	0.772886	0.630786	0.851247	0.683975	0.733201	0.952085	0.73443	0.717087	0.809368	0.737504	0.774247	0.843855	0.976695	0.810453	0.87665	0.858782	0.9528	0.816914	0.863117	0.84765									0.801764	0.0844136
27.2454	0.777131	0.718771	0.782661	0.83475	0.787457	0.723023	0.676138	0.737235	0.640854	0.819566	0.68802	0.73973	0.960498	0.702603	0.720192	0.801784	0.730366	0.809306	0.843975	0.973811	0.816592	0.896757	0.845406	0.940745	0.767152	0.885645	0.82283									0.794185	0.0864033
27.4549	0.803614	0.708359	0.808417	0.764842	0.786259	0.684483	0.721937	0.749685	0.622718	0.839835	0.710679	0.72798	0.984348	0.707216	0.699426	0.792961	0.731816	0.79447	0.837199	0.995777	0.849511	0.861992	0.84878	0.9363	0.773397	0.844928	0.839867									0.793585	0.0889389
27.6645	0.832219	0.714957	0.774144	0.806845	0.743923	0.732116	0.705245	0.738514	0.628172	0.831508	0.697104	0.719066	0.973511	0.704729	0.71854	0.791074	0.707915	0.76523	0.825591	0.983812	0.843658	0.874222	0.852574	0.933987	0.802836	0.869594	0.847339									0.793275	0.0879651
27.8741	0.820827	0.725806	0.716775	0.736606	0.761809	0.730857	0.699707	0.743054	0.634352	0.836672	0.69945	0.72724	0.942326	0.736754	0.715535	0.780828	0.760157	0.75211	0.853408	0.952732	0.799033	0.86697	0.838881	0.956738	0.781649	0.842961	0.83892									0.787117	0.0813852
28.0837	0.808136	0.760933	0.746411	0.75346	0.792912	0.73406	0.71556	0.761424	0.620866	0.859996	0.73223	0.716454	0.926684	0.693359	0.708308	0.771177	0.684599	0.785181	0.84143	0.951803	0.814286	0.87269	0.860368	0.945097	0.804689	0.842775	0.844119									0.790704	0.0816925
28.2933	0.829691	0.734202	0.765957	0.742333	0.784297	0.690065	0.72064	0.746619	0.642565	0.852735	0.732603	0.719088	0.926508	0.71259	0.689824	0.765547	0.725017	0.822674	0.877975	0.965772	0.828779	0.890869	0.846255	0.905142	0.856659	0.850813	0.812693									0.793997	0.0817498
28.5028	0.826324	0.735909	0.754566	0.737074	0.764162	0.743102	0.716437	0.746639	0.623899	0.811909	0.749758	0.718987	0.927049	0.725982	0.678579	0.785118	0.750926	0.793377	0.867133	0.940359	0.785155	0.884946	0.87986	0.907626	0.846521	0.794838	0.844988									0.790416	0.0774083
28.7124	0.809121	0.738451	0.746225	0.734639	0.767151	0.696772	0.735439	0.77893	0.643503	0.772859	0.75609	0.700908	0.931866	0.71419	0.695308	0.807352	0.742917	0.807277	0.842155	0.936475	0.81873	0.860567	0.862266	0.901573	0.806658	0.788675	0.860908									0.787296	0.0737919
28.922	0.804814	0.709418	0.751767	0.767348	0.742286	0.733855	0.699724	0.704668	0.640299	0.813926	0.781503	0.701391	0.936972	0.733718	0.692944	0.782265	0.724872	0.809911	0.830365	0.971487	0.822275	0.861946	0.869605	0.914305	0.788129	0.861884	0.865498									0.789525	0.081519
29.1316	0.807475	0.706276	0.764716	0.743422	0.757288	0.738483	0.750386	0.712977	0.626915	0.826034	0.775277	0.713991	0.940221	0.696165	0.686666	0.795233	0.688434	0.807282	0.805763	0.951687	0.790723	0.864458	0.874077	0.956481	0.772207	0.877858	0.819407									0.787033	0.0839673
29.3412	0.784369	0.687163	0.75195	0.694826	0.792655	0.757104	0.703713	0.722821	0.639742	0.873583	0.725516	0.705948	0.967473	0.696926	0.681945	0.767363	0.708347	0.852944	0.829195	0.947812	0.81861	0.845215	0.846937	0.952614	0.759826	0.838915	0.84938									0.785292	0.0886107
29.5507	0.758384	0.687941	0.760865	0.768026	0.77537	0.722496	0.719588	0.702085	0.636497	0.827304	0.752691	0.706197	0.931439	0.701831	0.698712	0.761657	0.717733	0.824654	0.858256	0.975932	0.797883	0.844841	0.848292	0.920774	0.791734	0.874152	0.848299									0.78569	0.0831344
29.7603	0.760002	0.748655	0.768741	0.773641	0.77771	0.739775	0.715886	0.719284	0.612178	0.845353	0.748099	0.730023	0.920786	0.706309	0.671477	0.732442	0.707463	0.870774	0.820474	0.939481	0.798832	0.86143	0.829434	0.948007	0.792976	0.857756	0.870953									0.787702	0.0825846
29.9699	0.778619	0.70525	0.754529	0.727805	0.798602	0.758177	0.734274	0.713126	0.61747	0.829624	0.718629	0.713591	0.96527	0.71794	0.693255	0.799094	0.731414	0.834581	0.82517	0.989018	0.819726	0.850335	0.86082	0.915632	0.819832	0.870444	0.854371									0.792467	0.0861778
30.1795	0.755938	0.698807	0.806768	0.824109	0.791394	0.754726	0.76374	0.705504	0.648137	0.816945	0.76345	0.744298	0.974849	0.708503	0.695466	0.790735	0.714391	0.869078	0.850112	0.936374	0.810075	0.85033	0.859323	0.948497	0.832988	0.877327	0.828701									0.800762	0.0813852
30.3891	0.735153	0.748008	0.792779	0.734334	0.758663	0.689953	0.742384	0.675149	0.614743	0.831423	0.735874	0.734201	0.942185	0.728955	0.703159	0.78006	0.732999	0.848604	0.822173	0.961828	0.818938	0.835524	0.857818	0.904766	0.863309	0.91168	0.862959									0.791393	0.0856431
30.5986	0.766004	0.708318	0.819694	0.781799	0.78958	0.703445	0.713113	0.705586	0.615852	0.79474	0.756225	0.731061	0.96703	0.690961	0.703255	0.785787	0.737603	0.85149	0.850566	0.918387	0.81899	0.862568	0.852709	0.891127	0.864182	0.856157	0.879507									0.793175	0.0824957
30.8082	0.785532	0.751042	0.790173	0.77126	0.739192	0.679202	0.70794	0.674387	0.602242	0.864747	0.775021	0.734041	0.968486	0.71241	0.684334	0.777653	0.722527	0.824681	0.819964	0.94483	0.833591	0.816991	0.852404	0.901355	0.85974	0.886575	0.871505									0.790808	0.0878377
31.0178	0.727707	0.752696	0.82207	0.82943	0.799197	0.693247	0.696647	0.760064	0.585626	0.847964	0.727995	0.733366	1.03413	0.709792	0.710215	0.80856	0.700014	0.870947	0.810638	0.908296	0.802742	0.843332	0.852742	0.912371	0.868034	0.829368	0.918342									0.798353	0.0930367
31.2274	0.748529	0.727009	0.765162	0.82196	0.769728	0.686773	0.747803	0.731767	0.605559	0.861157	0.761904	0.751044	1.0224	0.717643	0.701848	0.822776	0.714429	0.857564	0.835238	0.930264	0.805779	0.854251	0.852137	0.900407	0.851258	0.833708	0.892504									0.798911	0.0875949

## Sheet: Half times and mobile fractions
Sample	Half Time	Mobile Fraction		Sample	Half Time	Mobile Fraction
Wild-type	1.55	77.3		MO	2.27	66.1
Wild-type	1.34	72.1		MO	1.86	60.3
Wild-type	2.54	74		MO	1.8	60
Wild-type	1.57	79.8		MO	1.81	49
Wild-type	1.67	75.8		MO	1.82	59.1
Wild-type	1.56	72.7		MO	1.46	58.5
Wild-type	1.82	71.7		MO	1.21	59.1
Wild-type	1.5	72.4		MO	2.25	54.2
Wild-type	0.96	62.5		MO	1.44	48.4
Wild-type	2.01	81.7		MO	2.15	38.7
Wild-type	1.04	71.1		MO	2.46	39.8
Wild-type	1.2	68.2		MO	2.09	46.8
Wild-type	1.27	79.5		MO	1.51	50.1
Wild-type	1.89	71.3		MO	2.1	39.7
Wild-type	0.88	82.1		MO	1.49	61.7
Wild-type	1.06	82		MO	2.12	43.6
Wild-type	2.07	92.2		MO	2.84	49.4
Wild-type	1.36	78.7		MO	1.14	53.3
Wild-type	1.72	85		MO	1.17	56.9
Wild-type	2.64	83.2		MO	1.43	56.8
Wild-type	2.45	87		MO	1.46	60.1
Wild-type	1.7	75.7		MO	1	49.3
Wild-type	1.13	82.7		MO	0.72	49.4
Wild-type	1.55	82.5		MO	0.66	58.8
Wild-type	0.87	73.2		MO	1.8	53.8
				MO	1.39	60.4
				MO	1.38	47.7
	Average	Average		MO	0.88	50.6
	1.574	77.376		MO	1.56	64.4
	0.496664	6.63377		MO	0.62	53.5
				MO	0.97	58.4
					Average	Average
					1.57613	53.4806
					0.550283	7.25385
