# Supplementary material for: A liquid-like organelle at the root of motile ciliopathy
Source: eLife. 2018 Dec 18;7:e38497. doi: 10.7554/eLife.38497 (PMC6349401; doi:10.7554/eLife.38497)
Supplement: Figure 8—source data 3. [file elife-38497-fig8-data3.xlsx]

## Sheet: Sheet1
image name	DynAPs #		image name	DynAPs #
control1-2	13		MO 1-2	5
control 2-2	15		MO 2-2	6
control 3-2	12		MO 3-2	6
control 4-2	17		MO 4-2	9
	13		MO 5-2	7
control 5-2	23		MO 6-2	7
control 6-2	15		MO 7-1	9
control 7-2	15		MO 8-2	3
control 8-2	19		MO 9-2	6
control9-3	18		MO 10-2	7
control 10-11	16		MO 11-2	7
	14		MO 12-2	11
control 11-2	13		MO 132	14
control 12-2	10		Mo 14-2	13
	18		MO 15-2	11
Control 11-2	14		MO 11-2	5
	16		Mo 12-2	11
Control 12-1	17		MO 13-2	10
control 13-2	26		MO 14-2	12
control 14-2	15		MO 15-2	10
Control 15-2	17		MO 21-2	7
	20		MO 22-2	7
Control 21-2	15		MO 23-2	23
	15		MO 24-2	5
Control 22-2	15		Mo 25-2	8
Control23-2	15		MO 26-2	9
control23-2	14			8
Control 31-2	13		Mo 31-2	5
control 32-2	17		MO 32-2	11
control 33-2	14		Mo 33-2	10
Control 34-2	26		MO 34-2	17
control 35-2	22		MO 35-2	15
