# Supplementary material for: A liquid-like organelle at the root of motile ciliopathy
Source: eLife journal article supplement (doi:10.7554/elife.38497), 2018-12-18
Supplement: supp [file elife-38497-supp-v1.zip]

A

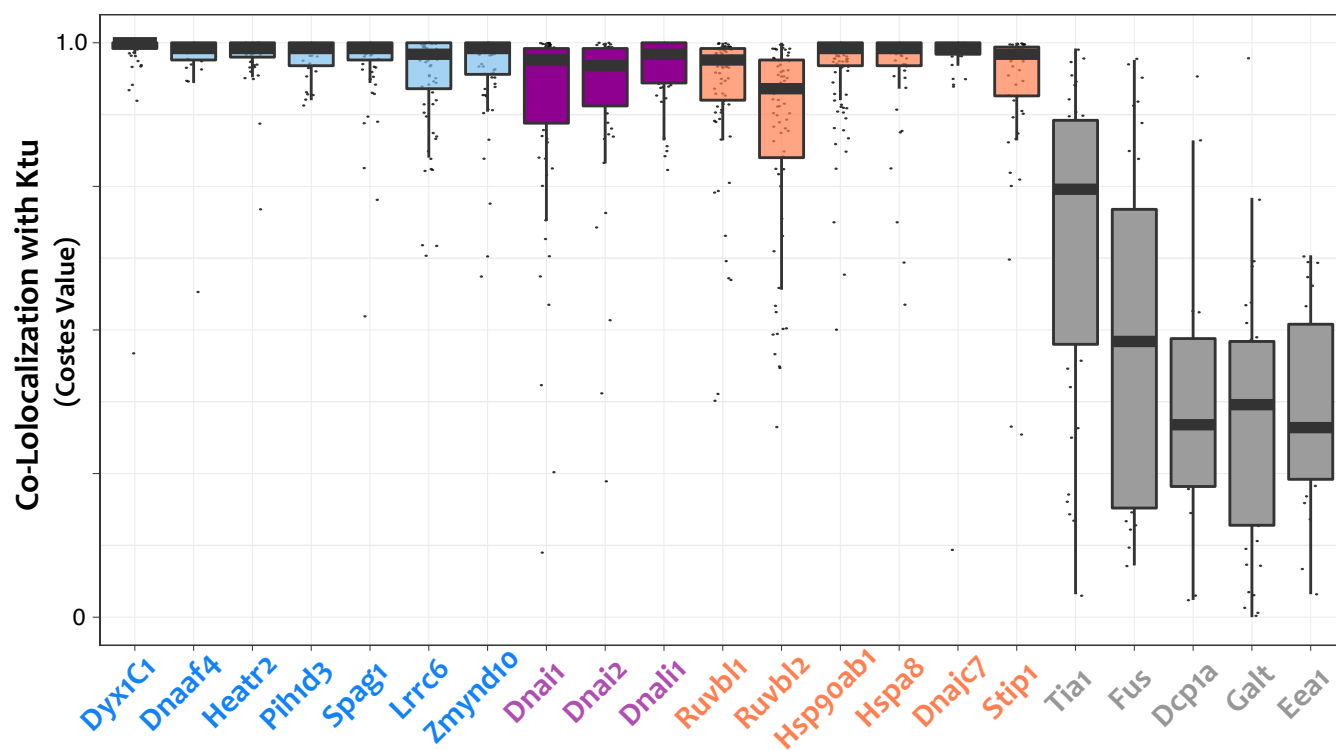

B

| Protein  | Pearson Correlation |        | Costes Value    |        | N = |
|----------|---------------------|--------|-----------------|--------|-----|
|          | Mean $\pm$ SD       | Median | Mean $\pm$ SD   | Median |     |
| Dnaaf3   | 0.62 $\pm$ 0.13     | 0.63   | 0.98 $\pm$ 0.08 | 1.00   | 54  |
| Dnaaf4   | 0.69 $\pm$ 0.10     | 0.71   | 0.97 $\pm$ 0.08 | 0.99   | 27  |
| Heatr2   | 0.53 $\pm$ 0.10     | 0.52   | 0.98 $\pm$ 0.05 | 0.99   | 47  |
| Pih1d3   | 0.48 $\pm$ 0.09     | 0.48   | 0.97 $\pm$ 0.03 | 0.99   | 32  |
| Spag1    | 0.69 $\pm$ 0.12     | 0.71   | 0.96 $\pm$ 0.08 | 0.99   | 65  |
| Lrrc6    | 0.50 $\pm$ 0.10     | 0.49   | 0.94 $\pm$ 0.09 | 0.98   | 69  |
| Zmynd10  | 0.72 $\pm$ 0.10     | 0.74   | 0.95 $\pm$ 0.08 | 0.99   | 63  |
| Dnai1    | 0.49 $\pm$ 0.20     | 0.54   | 0.89 $\pm$ 0.17 | 0.97   | 72  |
| Dnai2    | 0.43 $\pm$ 0.22     | 0.47   | 0.90 $\pm$ 0.16 | 0.96   | 49  |
| Dnali1   | 0.41 $\pm$ 0.17     | 0.39   | 0.95 $\pm$ 0.06 | 0.98   | 50  |
| Ruvbl1   | 0.61 $\pm$ 0.14     | 0.64   | 0.92 $\pm$ 0.12 | 0.97   | 85  |
| Ruvbl2   | 0.55 $\pm$ 0.13     | 0.58   | 0.85 $\pm$ 0.18 | 0.92   | 73  |
| Hsp90ab1 | 0.57 $\pm$ 0.12     | 0.56   | 0.96 $\pm$ 0.08 | 0.99   | 100 |
| Hspa8    | 0.45 $\pm$ 0.10     | 0.45   | 0.95 $\pm$ 0.10 | 0.99   | 53  |
| Dnajc7   | 0.63 $\pm$ 0.13     | 0.65   | 0.95 $\pm$ 0.16 | 0.99   | 30  |
| Stip1    | 0.53 $\pm$ 0.10     | 0.54   | 0.92 $\pm$ 0.14 | 0.98   | 52  |
| G3bp1    | 0.55 $\pm$ 0.12     | 0.55   | 0.96 $\pm$ 0.08 | 0.99   | 54  |
| Tia1     | 0.12 $\pm$ 0.14     | 0.14   | 0.65 $\pm$ 0.27 | 0.75   | 38  |
| Fus      | 0.01 $\pm$ 0.12     | 0.04   | 0.49 $\pm$ 0.29 | 0.48   | 33  |
| Dcp1a    | 0.03 $\pm$ 0.18     | -0.02  | 0.38 $\pm$ 0.25 | 0.34   | 16  |
| Galt     | (-)0.02 $\pm$ 0.09  | -0.02  | 0.33 $\pm$ 0.22 | 0.37   | 37  |
| Eea1     | (-)0.01 $\pm$ 0.10  | -0.01  | 0.36 $\pm$ 0.18 | 0.33   | 23  |
