# Supplementary material for: A liquid-like organelle at the root of motile ciliopathy
Source: eLife journal article supplement (doi:10.7554/elife.38497), 2018-12-18
Supplement: supp [file elife_poa_e38497_Figure_5_source_data_1.xlsx]

## Sheet: 2018_2_15_Aggregate_frap_curves
time	average	sd	gene	condition
0	0	0	Hsp90ab1	wild-type
0.20346	0.0725607	0.0409057	Hsp90ab1	wild-type
0.40691	0.12252	0.0447831	Hsp90ab1	wild-type
0.61037	0.171277	0.0660254	Hsp90ab1	wild-type
0.81383	0.19444	0.0877148	Hsp90ab1	wild-type
1.01728	0.223516	0.078923	Hsp90ab1	wild-type
1.22074	0.242737	0.0915294	Hsp90ab1	wild-type
1.4242	0.264378	0.0883314	Hsp90ab1	wild-type
1.62765	0.27408	0.09381	Hsp90ab1	wild-type
1.83111	0.300074	0.0909362	Hsp90ab1	wild-type
2.03457	0.304121	0.10699	Hsp90ab1	wild-type
2.23802	0.306955	0.114446	Hsp90ab1	wild-type
2.44148	0.300373	0.118371	Hsp90ab1	wild-type
2.64494	0.329459	0.089952	Hsp90ab1	wild-type
2.84839	0.339436	0.109824	Hsp90ab1	wild-type
3.05185	0.334535	0.0913545	Hsp90ab1	wild-type
3.25531	0.351652	0.107752	Hsp90ab1	wild-type
3.45876	0.354899	0.0915488	Hsp90ab1	wild-type
3.66222	0.368352	0.098147	Hsp90ab1	wild-type
3.86568	0.369717	0.100494	Hsp90ab1	wild-type
4.06913	0.385305	0.0913655	Hsp90ab1	wild-type
4.27259	0.370678	0.0882493	Hsp90ab1	wild-type
4.47605	0.38306	0.0978758	Hsp90ab1	wild-type
4.6795	0.390688	0.10076	Hsp90ab1	wild-type
4.88296	0.38852	0.0621905	Hsp90ab1	wild-type
5.08642	0.396488	0.0725394	Hsp90ab1	wild-type
5.28988	0.403943	0.068487	Hsp90ab1	wild-type
5.49333	0.38692	0.0749717	Hsp90ab1	wild-type
5.69679	0.40932	0.077919	Hsp90ab1	wild-type
5.90025	0.413392	0.0607609	Hsp90ab1	wild-type
6.1037	0.420061	0.0763543	Hsp90ab1	wild-type
6.30716	0.41647	0.0698204	Hsp90ab1	wild-type
6.51062	0.412987	0.0699149	Hsp90ab1	wild-type
6.71407	0.43181	0.091121	Hsp90ab1	wild-type
6.91753	0.435617	0.0972818	Hsp90ab1	wild-type
7.12099	0.453648	0.0845109	Hsp90ab1	wild-type
7.32444	0.441864	0.0848347	Hsp90ab1	wild-type
7.5279	0.440069	0.105487	Hsp90ab1	wild-type
7.73136	0.432505	0.0775605	Hsp90ab1	wild-type
7.93481	0.425979	0.0772403	Hsp90ab1	wild-type
8.13827	0.440125	0.0380047	Hsp90ab1	wild-type
8.34173	0.458677	0.0299432	Hsp90ab1	wild-type
8.54518	0.456703	0.0410897	Hsp90ab1	wild-type
8.74864	0.422103	0.0446031	Hsp90ab1	wild-type
8.9521	0.423269	0.0356539	Hsp90ab1	wild-type
9.15555	0.417573	0.0324386	Hsp90ab1	wild-type
9.35901	0.421408	0.0313986	Hsp90ab1	wild-type
9.56247	0.432256	0.0311379	Hsp90ab1	wild-type
9.76592	0.441978	0.029162	Hsp90ab1	wild-type
9.96938	0.436063	0.0471328	Hsp90ab1	wild-type
10.1728	0.449514	0.0429918	Hsp90ab1	wild-type
10.3763	0.454323	0.0395904	Hsp90ab1	wild-type
10.5798	0.474434	0.0348123	Hsp90ab1	wild-type
10.7832	0.458294	0.0433589	Hsp90ab1	wild-type
10.9867	0.478791	0.0413108	Hsp90ab1	wild-type
11.1901	0.477598	0.0532783	Hsp90ab1	wild-type
11.3936	0.468735	0.0631548	Hsp90ab1	wild-type
11.597	0.483079	0.0429579	Hsp90ab1	wild-type
11.8005	0.48438	0.0411412	Hsp90ab1	wild-type
12.0039	0.468089	0.0507327	Hsp90ab1	wild-type
12.2074	0.477804	0.0364401	Hsp90ab1	wild-type
12.4109	0.491463	0.0249458	Hsp90ab1	wild-type
12.6143	0.49963	0.0455796	Hsp90ab1	wild-type
12.8178	0.509155	0.0296037	Hsp90ab1	wild-type
13.0212	0.49798	0.0500959	Hsp90ab1	wild-type
13.2247	0.476138	0.058071	Hsp90ab1	wild-type
13.4281	0.524566	0.0313835	Hsp90ab1	wild-type
13.6316	0.491548	0.0394379	Hsp90ab1	wild-type
13.8351	0.514544	0.0206615	Hsp90ab1	wild-type
14.0385	0.49976	0.0547714	Hsp90ab1	wild-type
14.242	0.4994	0.0479669	Hsp90ab1	wild-type
14.4454	0.517807	0.0340934	Hsp90ab1	wild-type
14.6489	0.495868	0.0549236	Hsp90ab1	wild-type
14.8523	0.515566	0.0546113	Hsp90ab1	wild-type
15.0558	0.514721	0.0331853	Hsp90ab1	wild-type
15.2592	0.502964	0.0556592	Hsp90ab1	wild-type
15.4627	0.526743	0.0274777	Hsp90ab1	wild-type
15.6662	0.527413	0.0452866	Hsp90ab1	wild-type
15.8696	0.53776	0.0402568	Hsp90ab1	wild-type
16.0731	0.515887	0.0618411	Hsp90ab1	wild-type
16.2765	0.524361	0.0543442	Hsp90ab1	wild-type
16.48	0.534885	0.0401673	Hsp90ab1	wild-type
16.6835	0.533466	0.0566493	Hsp90ab1	wild-type
16.8869	0.531562	0.0300134	Hsp90ab1	wild-type
17.0904	0.524826	0.0466019	Hsp90ab1	wild-type
17.2938	0.533535	0.0507072	Hsp90ab1	wild-type
17.4973	0.522561	0.0498563	Hsp90ab1	wild-type
17.7007	0.53799	0.0658866	Hsp90ab1	wild-type
17.9042	0.528193	0.0555932	Hsp90ab1	wild-type
18.1076	0.530922	0.0648543	Hsp90ab1	wild-type
18.3111	0.523328	0.0602402	Hsp90ab1	wild-type
18.5146	0.555665	0.0634312	Hsp90ab1	wild-type
18.718	0.53128	0.0734509	Hsp90ab1	wild-type
18.9215	0.543555	0.0747164	Hsp90ab1	wild-type
19.1249	0.527201	0.0746787	Hsp90ab1	wild-type
19.3284	0.534539	0.0626751	Hsp90ab1	wild-type
19.5318	0.538527	0.0527246	Hsp90ab1	wild-type
19.7353	0.530604	0.0707068	Hsp90ab1	wild-type
19.9388	0.523532	0.0741499	Hsp90ab1	wild-type
20.1422	0.563433	0.0485066	Hsp90ab1	wild-type
20.3457	0.562519	0.0576599	Hsp90ab1	wild-type
20.5491	0.552118	0.0574862	Hsp90ab1	wild-type
20.7526	0.542156	0.0578109	Hsp90ab1	wild-type
20.956	0.549312	0.050718	Hsp90ab1	wild-type
21.1595	0.561234	0.0542484	Hsp90ab1	wild-type
21.363	0.554118	0.0410487	Hsp90ab1	wild-type
21.5664	0.555736	0.0519826	Hsp90ab1	wild-type
21.7699	0.561359	0.0459393	Hsp90ab1	wild-type
21.9733	0.586238	0.0518915	Hsp90ab1	wild-type
22.1768	0.562572	0.0323034	Hsp90ab1	wild-type
22.3802	0.575377	0.0408959	Hsp90ab1	wild-type
22.5837	0.56486	0.0229699	Hsp90ab1	wild-type
22.7872	0.573048	0.0310813	Hsp90ab1	wild-type
22.9906	0.577657	0.0473299	Hsp90ab1	wild-type
23.1941	0.579383	0.0452605	Hsp90ab1	wild-type
23.3975	0.608171	0.0387443	Hsp90ab1	wild-type
23.601	0.577143	0.0498429	Hsp90ab1	wild-type
23.8044	0.581389	0.0707149	Hsp90ab1	wild-type
24.0079	0.564955	0.0635602	Hsp90ab1	wild-type
24.2113	0.580546	0.0467935	Hsp90ab1	wild-type
24.4148	0.576476	0.0604127	Hsp90ab1	wild-type
24.6183	0.569658	0.0692792	Hsp90ab1	wild-type
24.8217	0.579215	0.0805098	Hsp90ab1	wild-type
25.0252	0.576998	0.0680831	Hsp90ab1	wild-type
25.2286	0.574336	0.0631698	Hsp90ab1	wild-type
25.4321	0.562637	0.0437357	Hsp90ab1	wild-type
25.6355	0.584868	0.053018	Hsp90ab1	wild-type
25.839	0.575276	0.052316	Hsp90ab1	wild-type
26.0425	0.609072	0.0234954	Hsp90ab1	wild-type
26.2459	0.571635	0.0513551	Hsp90ab1	wild-type
26.4494	0.571354	0.0472948	Hsp90ab1	wild-type
26.6528	0.584438	0.0591823	Hsp90ab1	wild-type
26.8563	0.57907	0.0534723	Hsp90ab1	wild-type
27.0598	0.570174	0.0545655	Hsp90ab1	wild-type
27.2632	0.568419	0.0555301	Hsp90ab1	wild-type
27.4667	0.576143	0.0413436	Hsp90ab1	wild-type
27.6701	0.576257	0.0537642	Hsp90ab1	wild-type
27.8736	0.554755	0.0808611	Hsp90ab1	wild-type
28.077	0.567561	0.0568859	Hsp90ab1	wild-type
28.2805	0.583133	0.0549392	Hsp90ab1	wild-type
28.4839	0.580202	0.0614977	Hsp90ab1	wild-type
28.6874	0.58806	0.054307	Hsp90ab1	wild-type
28.8909	0.579664	0.0655564	Hsp90ab1	wild-type
29.0943	0.577492	0.0568361	Hsp90ab1	wild-type
29.2978	0.577891	0.0459786	Hsp90ab1	wild-type
0	0	0	Ruvbl2	wild-type
0.20346	0.0621426	0.0218637	Ruvbl2	wild-type
0.40691	0.106591	0.0324859	Ruvbl2	wild-type
0.61037	0.139476	0.0411985	Ruvbl2	wild-type
0.81383	0.168297	0.0491054	Ruvbl2	wild-type
1.01728	0.197961	0.0504779	Ruvbl2	wild-type
1.22074	0.223552	0.0513979	Ruvbl2	wild-type
1.4242	0.240979	0.0518069	Ruvbl2	wild-type
1.62765	0.25767	0.0572976	Ruvbl2	wild-type
1.83111	0.279659	0.0610259	Ruvbl2	wild-type
2.03457	0.298885	0.0534128	Ruvbl2	wild-type
2.23802	0.307745	0.0642525	Ruvbl2	wild-type
2.44148	0.315733	0.0581924	Ruvbl2	wild-type
2.64494	0.340058	0.0642943	Ruvbl2	wild-type
2.84839	0.345559	0.0689442	Ruvbl2	wild-type
3.05185	0.358533	0.0714573	Ruvbl2	wild-type
3.25531	0.374559	0.0672391	Ruvbl2	wild-type
3.45876	0.39104	0.0699505	Ruvbl2	wild-type
3.66222	0.393562	0.0669313	Ruvbl2	wild-type
3.86568	0.394797	0.0684283	Ruvbl2	wild-type
4.06913	0.409667	0.0671369	Ruvbl2	wild-type
4.27259	0.419778	0.0751221	Ruvbl2	wild-type
4.47605	0.429096	0.0697418	Ruvbl2	wild-type
4.6795	0.434825	0.071012	Ruvbl2	wild-type
4.88296	0.448467	0.0780376	Ruvbl2	wild-type
5.08642	0.447352	0.07705	Ruvbl2	wild-type
5.28988	0.452448	0.0651187	Ruvbl2	wild-type
5.49333	0.470687	0.0658947	Ruvbl2	wild-type
5.69679	0.482077	0.0695266	Ruvbl2	wild-type
5.90025	0.477999	0.0727874	Ruvbl2	wild-type
6.1037	0.486775	0.073523	Ruvbl2	wild-type
6.30716	0.495651	0.0724367	Ruvbl2	wild-type
6.51062	0.497003	0.0658399	Ruvbl2	wild-type
6.71407	0.498293	0.0725156	Ruvbl2	wild-type
6.91753	0.502955	0.0760343	Ruvbl2	wild-type
7.12099	0.507325	0.0743788	Ruvbl2	wild-type
7.32444	0.50994	0.0668659	Ruvbl2	wild-type
7.5279	0.513642	0.0719951	Ruvbl2	wild-type
7.73136	0.518409	0.0660327	Ruvbl2	wild-type
7.93481	0.518473	0.0878093	Ruvbl2	wild-type
8.13827	0.521397	0.0813061	Ruvbl2	wild-type
8.34173	0.520713	0.0654451	Ruvbl2	wild-type
8.54518	0.535988	0.0711865	Ruvbl2	wild-type
8.74864	0.535734	0.0654446	Ruvbl2	wild-type
8.9521	0.546415	0.0728257	Ruvbl2	wild-type
9.15555	0.538423	0.0737201	Ruvbl2	wild-type
9.35901	0.557444	0.0746167	Ruvbl2	wild-type
9.56247	0.554166	0.0771308	Ruvbl2	wild-type
9.76592	0.546503	0.0828619	Ruvbl2	wild-type
9.96938	0.563654	0.076945	Ruvbl2	wild-type
10.1728	0.558303	0.0688997	Ruvbl2	wild-type
10.3763	0.567605	0.0815271	Ruvbl2	wild-type
10.5798	0.57112	0.0691291	Ruvbl2	wild-type
10.7832	0.573417	0.0794666	Ruvbl2	wild-type
10.9867	0.574625	0.0749164	Ruvbl2	wild-type
11.1901	0.571178	0.0778476	Ruvbl2	wild-type
11.3936	0.562363	0.0795237	Ruvbl2	wild-type
11.597	0.577986	0.0879713	Ruvbl2	wild-type
11.8005	0.581835	0.0954147	Ruvbl2	wild-type
12.0039	0.587001	0.0962038	Ruvbl2	wild-type
12.2074	0.594522	0.0875078	Ruvbl2	wild-type
12.4109	0.589653	0.0922856	Ruvbl2	wild-type
12.6143	0.602524	0.0977009	Ruvbl2	wild-type
12.8178	0.601147	0.0894259	Ruvbl2	wild-type
13.0212	0.604867	0.0794569	Ruvbl2	wild-type
13.2247	0.611944	0.0838462	Ruvbl2	wild-type
13.4281	0.595273	0.0872794	Ruvbl2	wild-type
13.6316	0.608063	0.0916519	Ruvbl2	wild-type
13.8351	0.616127	0.0880085	Ruvbl2	wild-type
14.0385	0.60131	0.0923451	Ruvbl2	wild-type
14.242	0.604508	0.0839494	Ruvbl2	wild-type
14.4454	0.608096	0.0861937	Ruvbl2	wild-type
14.6489	0.601044	0.0929423	Ruvbl2	wild-type
14.8523	0.612456	0.0901928	Ruvbl2	wild-type
15.0558	0.61428	0.0770303	Ruvbl2	wild-type
15.2592	0.619674	0.0989793	Ruvbl2	wild-type
15.4627	0.610288	0.0841367	Ruvbl2	wild-type
15.6662	0.621889	0.070915	Ruvbl2	wild-type
15.8696	0.622401	0.0720288	Ruvbl2	wild-type
16.0731	0.62037	0.0736634	Ruvbl2	wild-type
16.2765	0.632267	0.0838547	Ruvbl2	wild-type
16.48	0.622659	0.0735945	Ruvbl2	wild-type
16.6835	0.62551	0.0749923	Ruvbl2	wild-type
16.8869	0.61628	0.0652092	Ruvbl2	wild-type
17.0904	0.631446	0.0841916	Ruvbl2	wild-type
17.2938	0.632311	0.0643889	Ruvbl2	wild-type
17.4973	0.626619	0.0696087	Ruvbl2	wild-type
17.7007	0.631169	0.0687484	Ruvbl2	wild-type
17.9042	0.642976	0.0798365	Ruvbl2	wild-type
18.1076	0.638937	0.0707032	Ruvbl2	wild-type
18.3111	0.63621	0.0728915	Ruvbl2	wild-type
18.5146	0.640385	0.079599	Ruvbl2	wild-type
18.718	0.643511	0.0775041	Ruvbl2	wild-type
18.9215	0.633043	0.0664929	Ruvbl2	wild-type
19.1249	0.652008	0.0825793	Ruvbl2	wild-type
19.3284	0.646683	0.0873598	Ruvbl2	wild-type
19.5318	0.639838	0.0750115	Ruvbl2	wild-type
19.7353	0.632781	0.0757036	Ruvbl2	wild-type
19.9388	0.640831	0.0774125	Ruvbl2	wild-type
20.1422	0.643149	0.0785408	Ruvbl2	wild-type
20.3457	0.629824	0.0796954	Ruvbl2	wild-type
20.5491	0.640288	0.0839419	Ruvbl2	wild-type
20.7526	0.64978	0.0890929	Ruvbl2	wild-type
20.956	0.643642	0.0844743	Ruvbl2	wild-type
21.1595	0.642225	0.0881417	Ruvbl2	wild-type
21.363	0.636679	0.0852127	Ruvbl2	wild-type
21.5664	0.634623	0.0726096	Ruvbl2	wild-type
21.7699	0.632592	0.0673757	Ruvbl2	wild-type
21.9733	0.632196	0.0867389	Ruvbl2	wild-type
22.1768	0.634708	0.0870596	Ruvbl2	wild-type
22.3802	0.626513	0.0775897	Ruvbl2	wild-type
22.5837	0.617079	0.0835232	Ruvbl2	wild-type
22.7872	0.611621	0.0808866	Ruvbl2	wild-type
22.9906	0.617671	0.0918468	Ruvbl2	wild-type
23.1941	0.616461	0.0822589	Ruvbl2	wild-type
23.3975	0.615654	0.0771934	Ruvbl2	wild-type
23.601	0.629412	0.0905513	Ruvbl2	wild-type
23.8044	0.626542	0.0784467	Ruvbl2	wild-type
24.0079	0.622211	0.0928362	Ruvbl2	wild-type
24.2113	0.627621	0.0823253	Ruvbl2	wild-type
24.4148	0.629351	0.0862083	Ruvbl2	wild-type
24.6183	0.620085	0.0902023	Ruvbl2	wild-type
24.8217	0.621835	0.0847159	Ruvbl2	wild-type
25.0252	0.62216	0.0869245	Ruvbl2	wild-type
25.2286	0.627013	0.0922259	Ruvbl2	wild-type
25.4321	0.633221	0.0852009	Ruvbl2	wild-type
25.6355	0.637407	0.0936418	Ruvbl2	wild-type
25.839	0.623889	0.0983304	Ruvbl2	wild-type
26.0425	0.631385	0.0860052	Ruvbl2	wild-type
26.2459	0.628753	0.084577	Ruvbl2	wild-type
26.4494	0.63089	0.0888955	Ruvbl2	wild-type
26.6528	0.627262	0.0864928	Ruvbl2	wild-type
26.8563	0.630925	0.0827014	Ruvbl2	wild-type
27.0598	0.63006	0.0813589	Ruvbl2	wild-type
27.2632	0.619717	0.0693221	Ruvbl2	wild-type
27.4667	0.623017	0.0759446	Ruvbl2	wild-type
27.6701	0.625482	0.0684388	Ruvbl2	wild-type
27.8736	0.613129	0.0714928	Ruvbl2	wild-type
28.077	0.610468	0.0672812	Ruvbl2	wild-type
28.2805	0.618139	0.0679865	Ruvbl2	wild-type
28.4839	0.614189	0.069026	Ruvbl2	wild-type
28.6874	0.612803	0.0621595	Ruvbl2	wild-type
28.8909	0.62358	0.0760428	Ruvbl2	wild-type
29.0943	0.62238	0.0768495	Ruvbl2	wild-type
29.2978	0.622172	0.0696771	Ruvbl2	wild-type
0	0.00085	0.000736012	Galt	wild-type
0.20346	0.0019575	0.00111368	Galt	wild-type
0.40691	0.003155	0.00261763	Galt	wild-type
0.61037	0.00293	0.00204113	Galt	wild-type
0.81383	0.003165	0.00184003	Galt	wild-type
1.01728	0.0036325	0.00188919	Galt	wild-type
1.22074	0.0047	0.00288429	Galt	wild-type
1.4242	0.00342125	0.00197283	Galt	wild-type
1.62765	0.0046225	0.00384954	Galt	wild-type
1.83111	0.00457125	0.00329141	Galt	wild-type
2.03457	0.00538	0.00376828	Galt	wild-type
2.23802	0.005055	0.00415127	Galt	wild-type
2.44148	0.00583875	0.0048082	Galt	wild-type
2.64494	0.00503125	0.00344187	Galt	wild-type
2.84839	0.0070825	0.00509901	Galt	wild-type
3.05185	0.0062125	0.00464698	Galt	wild-type
3.25531	0.0051225	0.00329805	Galt	wild-type
3.45876	0.00612625	0.00431833	Galt	wild-type
3.66222	0.00629875	0.00347929	Galt	wild-type
3.86568	0.006815	0.00425581	Galt	wild-type
4.06913	0.00626375	0.0043021	Galt	wild-type
4.27259	0.00705125	0.00487958	Galt	wild-type
4.47605	0.00838625	0.00628921	Galt	wild-type
4.6795	0.00700375	0.00545488	Galt	wild-type
4.88296	0.00759375	0.00530246	Galt	wild-type
5.08642	0.007655	0.00518924	Galt	wild-type
5.28988	0.00860375	0.00566832	Galt	wild-type
5.49333	0.0092575	0.00773426	Galt	wild-type
5.69679	0.00944125	0.00725898	Galt	wild-type
5.90025	0.00846375	0.00542939	Galt	wild-type
6.1037	0.0105437	0.00763398	Galt	wild-type
6.30716	0.0100337	0.00688263	Galt	wild-type
6.51062	0.00929375	0.00746846	Galt	wild-type
6.71407	0.0102775	0.00850765	Galt	wild-type
6.91753	0.0103763	0.00820004	Galt	wild-type
7.12099	0.0100213	0.00721594	Galt	wild-type
7.32444	0.0107	0.00764844	Galt	wild-type
7.5279	0.0109187	0.00763672	Galt	wild-type
7.73136	0.0112912	0.00936126	Galt	wild-type
7.93481	0.0122425	0.00938257	Galt	wild-type
8.13827	0.010805	0.00753506	Galt	wild-type
8.34173	0.0127362	0.00933682	Galt	wild-type
8.54518	0.0145375	0.0109687	Galt	wild-type
8.74864	0.0144812	0.013057	Galt	wild-type
8.9521	0.0140525	0.011836	Galt	wild-type
9.15555	0.0150312	0.0124394	Galt	wild-type
9.35901	0.014095	0.0106224	Galt	wild-type
9.56247	0.0154938	0.0114565	Galt	wild-type
9.76592	0.0152825	0.01262	Galt	wild-type
9.96938	0.0157525	0.0138134	Galt	wild-type
10.1728	0.0157312	0.0123899	Galt	wild-type
10.3763	0.0157137	0.0120294	Galt	wild-type
10.5798	0.0169688	0.0120734	Galt	wild-type
10.7832	0.0168487	0.0127642	Galt	wild-type
10.9867	0.01581	0.0113666	Galt	wild-type
11.1901	0.017275	0.0130417	Galt	wild-type
11.3936	0.018985	0.0158277	Galt	wild-type
11.597	0.0189225	0.0135125	Galt	wild-type
11.8005	0.0172925	0.0148553	Galt	wild-type
12.0039	0.0170163	0.0132266	Galt	wild-type
12.2074	0.0192763	0.0135069	Galt	wild-type
12.4109	0.0185	0.0152046	Galt	wild-type
12.6143	0.0174037	0.0135344	Galt	wild-type
12.8178	0.0186637	0.0160519	Galt	wild-type
13.0212	0.018035	0.012922	Galt	wild-type
13.2247	0.0181575	0.0148149	Galt	wild-type
13.4281	0.0179263	0.0134079	Galt	wild-type
13.6316	0.019665	0.0156834	Galt	wild-type
13.8351	0.0201	0.0167315	Galt	wild-type
14.0385	0.0192538	0.0157361	Galt	wild-type
14.242	0.019925	0.0153107	Galt	wild-type
14.4454	0.0192788	0.0146757	Galt	wild-type
14.6489	0.021295	0.01683	Galt	wild-type
14.8523	0.0202913	0.0152798	Galt	wild-type
15.0558	0.022295	0.0198388	Galt	wild-type
15.2592	0.0214375	0.0175971	Galt	wild-type
15.4627	0.0211738	0.0166375	Galt	wild-type
15.6662	0.0219263	0.019159	Galt	wild-type
15.8696	0.021815	0.0184807	Galt	wild-type
16.0731	0.0206262	0.0158438	Galt	wild-type
16.2765	0.0220937	0.0169523	Galt	wild-type
16.48	0.021465	0.0190337	Galt	wild-type
16.6835	0.0211325	0.0171453	Galt	wild-type
16.8869	0.0216562	0.0191432	Galt	wild-type
17.0904	0.0205225	0.0166672	Galt	wild-type
17.2938	0.0225862	0.0187796	Galt	wild-type
17.4973	0.0219787	0.0180206	Galt	wild-type
17.7007	0.023595	0.021857	Galt	wild-type
17.9042	0.02157	0.0183871	Galt	wild-type
18.1076	0.020495	0.0163558	Galt	wild-type
18.3111	0.0209812	0.0156681	Galt	wild-type
18.5146	0.0210637	0.0161328	Galt	wild-type
18.718	0.0222663	0.0157996	Galt	wild-type
18.9215	0.0223288	0.015727	Galt	wild-type
19.1249	0.0224463	0.0162365	Galt	wild-type
19.3284	0.0237237	0.0187272	Galt	wild-type
19.5318	0.0220438	0.0159658	Galt	wild-type
19.7353	0.0246612	0.0191417	Galt	wild-type
19.9388	0.0252638	0.0189011	Galt	wild-type
20.1422	0.025905	0.0193117	Galt	wild-type
20.3457	0.024285	0.0173907	Galt	wild-type
20.5491	0.02594	0.0206778	Galt	wild-type
20.7526	0.0247213	0.0196939	Galt	wild-type
20.956	0.0246362	0.0186102	Galt	wild-type
21.1595	0.0238688	0.0170682	Galt	wild-type
21.363	0.0237412	0.0179567	Galt	wild-type
21.5664	0.0258625	0.0177904	Galt	wild-type
21.7699	0.0263337	0.018516	Galt	wild-type
21.9733	0.0236713	0.0158071	Galt	wild-type
22.1768	0.0237825	0.0168845	Galt	wild-type
22.3802	0.024105	0.0165022	Galt	wild-type
22.5837	0.024375	0.0169292	Galt	wild-type
22.7872	0.0250375	0.0189261	Galt	wild-type
22.9906	0.0252763	0.0195216	Galt	wild-type
23.1941	0.0242975	0.0168228	Galt	wild-type
23.3975	0.0263013	0.0192527	Galt	wild-type
23.601	0.0253263	0.0186186	Galt	wild-type
23.8044	0.0244325	0.0170804	Galt	wild-type
24.0079	0.0233938	0.0161008	Galt	wild-type
24.2113	0.024845	0.01783	Galt	wild-type
24.4148	0.0236013	0.0168017	Galt	wild-type
24.6183	0.024275	0.0164961	Galt	wild-type
24.8217	0.0229838	0.0157967	Galt	wild-type
25.0252	0.024515	0.0175127	Galt	wild-type
25.2286	0.0221313	0.0144935	Galt	wild-type
25.4321	0.0248687	0.0180704	Galt	wild-type
25.6355	0.0221362	0.0150139	Galt	wild-type
25.839	0.0254925	0.0153075	Galt	wild-type
26.0425	0.0229412	0.015647	Galt	wild-type
26.2459	0.0245863	0.0158707	Galt	wild-type
26.4494	0.0244925	0.0167919	Galt	wild-type
26.6528	0.0258925	0.0171773	Galt	wild-type
26.8563	0.02657	0.0198217	Galt	wild-type
27.0598	0.02681	0.0177309	Galt	wild-type
27.2632	0.0267725	0.019293	Galt	wild-type
27.4667	0.02737	0.0179955	Galt	wild-type
27.6701	0.026505	0.0171623	Galt	wild-type
27.8736	0.0266888	0.0179049	Galt	wild-type
28.077	0.0272163	0.0171522	Galt	wild-type
28.2805	0.02869	0.0170058	Galt	wild-type
28.4839	0.0278963	0.0196206	Galt	wild-type
28.6874	0.027125	0.0191193	Galt	wild-type
28.8909	0.0276687	0.0206317	Galt	wild-type
0	0	0	Lrrc6	wild-type
0.2099	0.159526	0.0396232	Lrrc6	wild-type
0.4199	0.243304	0.0530692	Lrrc6	wild-type
0.6298	0.29547	0.0637041	Lrrc6	wild-type
0.8398	0.337622	0.0714878	Lrrc6	wild-type
1.0497	0.367364	0.0751816	Lrrc6	wild-type
1.2596	0.386084	0.0744035	Lrrc6	wild-type
1.4696	0.410831	0.0807624	Lrrc6	wild-type
1.6795	0.424317	0.0774448	Lrrc6	wild-type
1.8894	0.442174	0.0781264	Lrrc6	wild-type
2.0994	0.454995	0.0820104	Lrrc6	wild-type
2.3093	0.459126	0.0927958	Lrrc6	wild-type
2.5193	0.473157	0.0870399	Lrrc6	wild-type
2.7292	0.482271	0.0882661	Lrrc6	wild-type
2.9391	0.4905	0.0864844	Lrrc6	wild-type
3.1491	0.490251	0.0896086	Lrrc6	wild-type
3.359	0.501993	0.0928193	Lrrc6	wild-type
3.569	0.513426	0.0812887	Lrrc6	wild-type
3.7789	0.512521	0.0861563	Lrrc6	wild-type
3.9888	0.518272	0.087641	Lrrc6	wild-type
4.1988	0.522232	0.0880281	Lrrc6	wild-type
4.4087	0.530881	0.0872243	Lrrc6	wild-type
4.6186	0.530831	0.0869473	Lrrc6	wild-type
4.8286	0.533762	0.0878976	Lrrc6	wild-type
5.0385	0.541484	0.0854341	Lrrc6	wild-type
5.2485	0.539466	0.0895713	Lrrc6	wild-type
5.4584	0.544114	0.0934273	Lrrc6	wild-type
5.6683	0.550221	0.0889437	Lrrc6	wild-type
5.8783	0.55221	0.0870299	Lrrc6	wild-type
6.0882	0.548114	0.0938706	Lrrc6	wild-type
6.2982	0.551067	0.0919678	Lrrc6	wild-type
6.5081	0.556831	0.0918105	Lrrc6	wild-type
6.718	0.559049	0.0910651	Lrrc6	wild-type
6.928	0.567671	0.0901257	Lrrc6	wild-type
7.1379	0.563177	0.0962894	Lrrc6	wild-type
7.3478	0.563027	0.0935604	Lrrc6	wild-type
7.5578	0.568465	0.0916087	Lrrc6	wild-type
7.7677	0.567303	0.089713	Lrrc6	wild-type
7.9777	0.570528	0.0915538	Lrrc6	wild-type
8.1876	0.566991	0.0895179	Lrrc6	wild-type
8.3975	0.570902	0.0924927	Lrrc6	wild-type
8.6075	0.570801	0.091081	Lrrc6	wild-type
8.8174	0.570831	0.0928088	Lrrc6	wild-type
9.0274	0.577066	0.0952024	Lrrc6	wild-type
9.2373	0.573454	0.0967737	Lrrc6	wild-type
9.4472	0.575372	0.0926498	Lrrc6	wild-type
9.6572	0.579358	0.100797	Lrrc6	wild-type
9.8671	0.5803	0.101117	Lrrc6	wild-type
10.077	0.574773	0.100011	Lrrc6	wild-type
10.287	0.579178	0.107163	Lrrc6	wild-type
10.4969	0.578446	0.102999	Lrrc6	wild-type
10.7069	0.573261	0.0964146	Lrrc6	wild-type
10.9168	0.578177	0.100411	Lrrc6	wild-type
11.1267	0.571694	0.100736	Lrrc6	wild-type
11.3367	0.574412	0.10388	Lrrc6	wild-type
11.5466	0.575045	0.107559	Lrrc6	wild-type
11.7566	0.578512	0.105136	Lrrc6	wild-type
11.9665	0.576734	0.107141	Lrrc6	wild-type
12.1764	0.5777	0.107066	Lrrc6	wild-type
12.3864	0.584282	0.105266	Lrrc6	wild-type
12.5963	0.584449	0.112202	Lrrc6	wild-type
12.8062	0.581014	0.10747	Lrrc6	wild-type
13.0162	0.584431	0.111535	Lrrc6	wild-type
13.2261	0.582068	0.108815	Lrrc6	wild-type
13.4361	0.577813	0.109875	Lrrc6	wild-type
13.646	0.579647	0.109206	Lrrc6	wild-type
13.8559	0.586031	0.117394	Lrrc6	wild-type
14.0659	0.582227	0.113911	Lrrc6	wild-type
14.2758	0.578546	0.115025	Lrrc6	wild-type
14.4858	0.585438	0.114333	Lrrc6	wild-type
14.6957	0.589284	0.117251	Lrrc6	wild-type
14.9056	0.588433	0.114395	Lrrc6	wild-type
15.1156	0.591903	0.115116	Lrrc6	wild-type
15.3255	0.593688	0.120286	Lrrc6	wild-type
15.5354	0.592481	0.122774	Lrrc6	wild-type
15.7454	0.593681	0.12493	Lrrc6	wild-type
15.9553	0.592242	0.127102	Lrrc6	wild-type
16.1653	0.592148	0.122202	Lrrc6	wild-type
16.3752	0.591059	0.12784	Lrrc6	wild-type
16.5851	0.59193	0.123311	Lrrc6	wild-type
16.7951	0.58953	0.119211	Lrrc6	wild-type
17.005	0.587296	0.115344	Lrrc6	wild-type
17.215	0.589711	0.115386	Lrrc6	wild-type
17.4249	0.590341	0.113068	Lrrc6	wild-type
17.6348	0.585412	0.11612	Lrrc6	wild-type
17.8448	0.588936	0.109273	Lrrc6	wild-type
18.0547	0.592331	0.109366	Lrrc6	wild-type
18.2646	0.59581	0.107401	Lrrc6	wild-type
18.4746	0.58898	0.103127	Lrrc6	wild-type
18.6845	0.594347	0.113859	Lrrc6	wild-type
18.8945	0.593617	0.115623	Lrrc6	wild-type
19.1044	0.594967	0.111657	Lrrc6	wild-type
19.3143	0.591948	0.110012	Lrrc6	wild-type
19.5243	0.595424	0.106507	Lrrc6	wild-type
19.7342	0.605325	0.110552	Lrrc6	wild-type
19.9442	0.59687	0.109193	Lrrc6	wild-type
20.1541	0.593863	0.109521	Lrrc6	wild-type
20.364	0.598899	0.110086	Lrrc6	wild-type
20.574	0.590878	0.107485	Lrrc6	wild-type
20.7839	0.598252	0.108094	Lrrc6	wild-type
20.9938	0.593598	0.110682	Lrrc6	wild-type
21.2038	0.596649	0.113076	Lrrc6	wild-type
21.4137	0.592978	0.114772	Lrrc6	wild-type
21.6237	0.596515	0.112498	Lrrc6	wild-type
21.8336	0.59922	0.106608	Lrrc6	wild-type
22.0435	0.595713	0.113019	Lrrc6	wild-type
22.2535	0.590891	0.108925	Lrrc6	wild-type
22.4634	0.588512	0.110847	Lrrc6	wild-type
22.6734	0.590989	0.11413	Lrrc6	wild-type
22.8833	0.592191	0.113085	Lrrc6	wild-type
23.0932	0.588273	0.115249	Lrrc6	wild-type
23.3032	0.589608	0.11851	Lrrc6	wild-type
23.5131	0.589205	0.118098	Lrrc6	wild-type
23.723	0.593076	0.116025	Lrrc6	wild-type
23.933	0.588272	0.120146	Lrrc6	wild-type
24.1429	0.588262	0.118261	Lrrc6	wild-type
24.3529	0.596578	0.114835	Lrrc6	wild-type
24.5628	0.600274	0.116865	Lrrc6	wild-type
24.7727	0.594281	0.117749	Lrrc6	wild-type
24.9827	0.591794	0.11753	Lrrc6	wild-type
25.1926	0.596268	0.122954	Lrrc6	wild-type
25.4026	0.597756	0.11899	Lrrc6	wild-type
25.6125	0.591493	0.119345	Lrrc6	wild-type
25.8224	0.592964	0.1227	Lrrc6	wild-type
26.0324	0.600184	0.119964	Lrrc6	wild-type
26.2423	0.598322	0.124441	Lrrc6	wild-type
26.4523	0.596885	0.11951	Lrrc6	wild-type
26.6622	0.601423	0.127389	Lrrc6	wild-type
26.8721	0.596229	0.116248	Lrrc6	wild-type
27.0821	0.603388	0.11502	Lrrc6	wild-type
27.292	0.601871	0.118228	Lrrc6	wild-type
27.5019	0.601104	0.118076	Lrrc6	wild-type
27.7119	0.600585	0.120465	Lrrc6	wild-type
27.9218	0.601137	0.116079	Lrrc6	wild-type
28.1318	0.598865	0.116806	Lrrc6	wild-type
28.3417	0.591819	0.121879	Lrrc6	wild-type
28.5516	0.601863	0.123513	Lrrc6	wild-type
28.7616	0.596163	0.118738	Lrrc6	wild-type
28.9715	0.596043	0.119094	Lrrc6	wild-type
29.1815	0.595347	0.12132	Lrrc6	wild-type
29.3914	0.593547	0.118322	Lrrc6	wild-type
29.6013	0.598027	0.117289	Lrrc6	wild-type
29.8113	0.594474	0.120391	Lrrc6	wild-type
30.0212	0.590965	0.120766	Lrrc6	wild-type
30.2311	0.597289	0.123747	Lrrc6	wild-type
0	0	0	Dnali1	wild-type
0.20346	0.0540342	0.0172304	Dnali1	wild-type
0.40691	0.0740614	0.0224255	Dnali1	wild-type
0.61037	0.109406	0.0313533	Dnali1	wild-type
0.81383	0.118234	0.0334214	Dnali1	wild-type
1.01728	0.145423	0.0481187	Dnali1	wild-type
1.22074	0.156201	0.0477337	Dnali1	wild-type
1.4242	0.158142	0.0439715	Dnali1	wild-type
1.62765	0.153861	0.043005	Dnali1	wild-type
1.83111	0.176139	0.0350415	Dnali1	wild-type
2.03457	0.160173	0.0496543	Dnali1	wild-type
2.23802	0.157386	0.0432498	Dnali1	wild-type
2.44148	0.160643	0.0311309	Dnali1	wild-type
2.64494	0.177578	0.0402945	Dnali1	wild-type
2.84839	0.18456	0.0362474	Dnali1	wild-type
3.05185	0.192141	0.0550758	Dnali1	wild-type
3.25531	0.192074	0.0517117	Dnali1	wild-type
3.45876	0.183576	0.0501502	Dnali1	wild-type
3.66222	0.187625	0.0491012	Dnali1	wild-type
3.86568	0.187264	0.0658706	Dnali1	wild-type
4.06913	0.188929	0.0317391	Dnali1	wild-type
4.27259	0.177513	0.0351127	Dnali1	wild-type
4.47605	0.201064	0.0590062	Dnali1	wild-type
4.6795	0.212699	0.0560141	Dnali1	wild-type
4.88296	0.201654	0.0614992	Dnali1	wild-type
5.08642	0.190532	0.0402029	Dnali1	wild-type
5.28988	0.205635	0.0660295	Dnali1	wild-type
5.49333	0.19778	0.0588402	Dnali1	wild-type
5.69679	0.21864	0.0531382	Dnali1	wild-type
5.90025	0.208625	0.0387045	Dnali1	wild-type
6.1037	0.207555	0.0363293	Dnali1	wild-type
6.30716	0.216504	0.0442181	Dnali1	wild-type
6.51062	0.20724	0.037439	Dnali1	wild-type
6.71407	0.19721	0.0389691	Dnali1	wild-type
6.91753	0.20386	0.0338208	Dnali1	wild-type
7.12099	0.20714	0.0347893	Dnali1	wild-type
7.32444	0.21349	0.0417576	Dnali1	wild-type
7.5279	0.21823	0.0675486	Dnali1	wild-type
7.73136	0.221867	0.0640358	Dnali1	wild-type
7.93481	0.217734	0.0313341	Dnali1	wild-type
8.13827	0.214541	0.065908	Dnali1	wild-type
8.34173	0.194208	0.0568642	Dnali1	wild-type
8.54518	0.212614	0.0542999	Dnali1	wild-type
8.74864	0.221747	0.0678907	Dnali1	wild-type
8.9521	0.224962	0.0446542	Dnali1	wild-type
9.15555	0.215414	0.0293622	Dnali1	wild-type
9.35901	0.210781	0.0461489	Dnali1	wild-type
9.56247	0.217375	0.0297831	Dnali1	wild-type
9.76592	0.211869	0.0399788	Dnali1	wild-type
9.96938	0.198824	0.0615674	Dnali1	wild-type
10.1728	0.224686	0.0676611	Dnali1	wild-type
10.3763	0.207011	0.0468536	Dnali1	wild-type
10.5798	0.201097	0.0202768	Dnali1	wild-type
10.7832	0.19283	0.0225768	Dnali1	wild-type
10.9867	0.201669	0.0387529	Dnali1	wild-type
11.1901	0.197733	0.0155484	Dnali1	wild-type
11.3936	0.208633	0.0241695	Dnali1	wild-type
11.597	0.230217	0.0601786	Dnali1	wild-type
11.8005	0.198139	0.0278727	Dnali1	wild-type
12.0039	0.204546	0.0238939	Dnali1	wild-type
12.2074	0.190932	0.0239525	Dnali1	wild-type
12.4109	0.214498	0.0403111	Dnali1	wild-type
12.6143	0.201524	0.0224625	Dnali1	wild-type
12.8178	0.202332	0.0248569	Dnali1	wild-type
13.0212	0.202596	0.0358402	Dnali1	wild-type
13.2247	0.202657	0.0240336	Dnali1	wild-type
13.4281	0.219304	0.0348738	Dnali1	wild-type
13.6316	0.219639	0.0244379	Dnali1	wild-type
13.8351	0.206583	0.034793	Dnali1	wild-type
14.0385	0.195017	0.0181608	Dnali1	wild-type
14.242	0.207369	0.0405294	Dnali1	wild-type
14.4454	0.215117	0.0243123	Dnali1	wild-type
14.6489	0.206653	0.0444908	Dnali1	wild-type
14.8523	0.205635	0.0328968	Dnali1	wild-type
15.0558	0.198635	0.0340692	Dnali1	wild-type
15.2592	0.206469	0.0541428	Dnali1	wild-type
15.4627	0.213699	0.0414138	Dnali1	wild-type
15.6662	0.193188	0.0208753	Dnali1	wild-type
15.8696	0.213973	0.0443701	Dnali1	wild-type
16.0731	0.214233	0.0410987	Dnali1	wild-type
16.2765	0.213362	0.0428791	Dnali1	wild-type
16.48	0.212139	0.0719419	Dnali1	wild-type
16.6835	0.204666	0.0527795	Dnali1	wild-type
16.8869	0.21808	0.0706684	Dnali1	wild-type
17.0904	0.226403	0.0541376	Dnali1	wild-type
17.2938	0.209391	0.0479538	Dnali1	wild-type
17.4973	0.214816	0.044326	Dnali1	wild-type
17.7007	0.20918	0.0618386	Dnali1	wild-type
17.9042	0.225785	0.0545833	Dnali1	wild-type
18.1076	0.193392	0.0469779	Dnali1	wild-type
18.3111	0.213238	0.0531755	Dnali1	wild-type
18.5146	0.20853	0.0572732	Dnali1	wild-type
18.718	0.213761	0.078185	Dnali1	wild-type
18.9215	0.205263	0.0384631	Dnali1	wild-type
19.1249	0.227417	0.0629669	Dnali1	wild-type
19.3284	0.217267	0.0465858	Dnali1	wild-type
19.5318	0.22304	0.0628711	Dnali1	wild-type
19.7353	0.23858	0.0811815	Dnali1	wild-type
19.9388	0.203315	0.0431775	Dnali1	wild-type
20.1422	0.19733	0.0497989	Dnali1	wild-type
20.3457	0.197775	0.0358286	Dnali1	wild-type
20.5491	0.198357	0.0370276	Dnali1	wild-type
20.7526	0.217706	0.0599059	Dnali1	wild-type
20.956	0.184871	0.0405294	Dnali1	wild-type
21.1595	0.199382	0.0226899	Dnali1	wild-type
21.363	0.210734	0.0305982	Dnali1	wild-type
21.5664	0.188184	0.0300128	Dnali1	wild-type
21.7699	0.183126	0.0282043	Dnali1	wild-type
21.9733	0.194627	0.0407354	Dnali1	wild-type
22.1768	0.196428	0.0232326	Dnali1	wild-type
22.3802	0.209226	0.0466782	Dnali1	wild-type
22.5837	0.205578	0.0431034	Dnali1	wild-type
22.7872	0.208941	0.0517891	Dnali1	wild-type
22.9906	0.208291	0.051839	Dnali1	wild-type
23.1941	0.204372	0.0474627	Dnali1	wild-type
23.3975	0.200421	0.0400529	Dnali1	wild-type
23.601	0.19596	0.0608435	Dnali1	wild-type
23.8044	0.199554	0.0537224	Dnali1	wild-type
24.0079	0.237523	0.0631682	Dnali1	wild-type
24.2113	0.214909	0.0524129	Dnali1	wild-type
24.4148	0.213364	0.0444916	Dnali1	wild-type
24.6183	0.230774	0.0615982	Dnali1	wild-type
24.8217	0.209777	0.0684063	Dnali1	wild-type
25.0252	0.212373	0.0842499	Dnali1	wild-type
25.2286	0.205673	0.0633951	Dnali1	wild-type
25.4321	0.198262	0.0729041	Dnali1	wild-type
25.6355	0.216464	0.0565609	Dnali1	wild-type
25.839	0.213698	0.0617383	Dnali1	wild-type
26.0425	0.214648	0.0803576	Dnali1	wild-type
26.2459	0.223523	0.0730712	Dnali1	wild-type
26.4494	0.226086	0.0773587	Dnali1	wild-type
26.6528	0.219154	0.0500171	Dnali1	wild-type
26.8563	0.219537	0.0672627	Dnali1	wild-type
27.0598	0.233	0.0808044	Dnali1	wild-type
27.2632	0.230576	0.0609655	Dnali1	wild-type
27.4667	0.218221	0.0813039	Dnali1	wild-type
27.6701	0.231801	0.0849347	Dnali1	wild-type
27.8736	0.2286	0.0829098	Dnali1	wild-type
28.077	0.211476	0.072435	Dnali1	wild-type
28.2805	0.23294	0.0990337	Dnali1	wild-type
28.4839	0.227165	0.0795716	Dnali1	wild-type
28.6874	0.225121	0.0749279	Dnali1	wild-type
28.8909	0.228743	0.0635593	Dnali1	wild-type
29.0943	0.239873	0.0722033	Dnali1	wild-type
29.2978	0.24552	0.0777223	Dnali1	wild-type
0	0	0	Dnaaf3	wild-type
0.20346	0.208982	0.0275223	Dnaaf3	wild-type
0.40691	0.343232	0.0487795	Dnaaf3	wild-type
0.61037	0.413157	0.0431723	Dnaaf3	wild-type
0.81383	0.449181	0.0366433	Dnaaf3	wild-type
1.01728	0.496434	0.0326395	Dnaaf3	wild-type
1.22074	0.54136	0.0292155	Dnaaf3	wild-type
1.4242	0.578247	0.0551114	Dnaaf3	wild-type
1.62765	0.56989	0.0362003	Dnaaf3	wild-type
1.83111	0.588607	0.0395374	Dnaaf3	wild-type
2.03457	0.60222	0.0469175	Dnaaf3	wild-type
2.23802	0.639863	0.06555	Dnaaf3	wild-type
2.44148	0.626934	0.0283541	Dnaaf3	wild-type
2.64494	0.64554	0.0233939	Dnaaf3	wild-type
2.84839	0.674044	0.0322262	Dnaaf3	wild-type
3.05185	0.668672	0.0460685	Dnaaf3	wild-type
3.25531	0.671213	0.0362132	Dnaaf3	wild-type
3.45876	0.677505	0.0557541	Dnaaf3	wild-type
3.66222	0.694445	0.0382123	Dnaaf3	wild-type
3.86568	0.6635	0.0275713	Dnaaf3	wild-type
4.06913	0.697449	0.0663237	Dnaaf3	wild-type
4.27259	0.692389	0.0163937	Dnaaf3	wild-type
4.47605	0.701443	0.0428277	Dnaaf3	wild-type
4.6795	0.713056	0.0598165	Dnaaf3	wild-type
4.88296	0.707374	0.0284824	Dnaaf3	wild-type
5.08642	0.695649	0.0299356	Dnaaf3	wild-type
5.28988	0.725682	0.0686498	Dnaaf3	wild-type
5.49333	0.717221	0.0273428	Dnaaf3	wild-type
5.69679	0.743749	0.0717501	Dnaaf3	wild-type
5.90025	0.710529	0.0259962	Dnaaf3	wild-type
6.1037	0.71591	0.0299905	Dnaaf3	wild-type
6.30716	0.729595	0.0377146	Dnaaf3	wild-type
6.51062	0.714766	0.040995	Dnaaf3	wild-type
6.71407	0.730599	0.0401228	Dnaaf3	wild-type
6.91753	0.727041	0.0384737	Dnaaf3	wild-type
7.12099	0.723558	0.056606	Dnaaf3	wild-type
7.32444	0.74565	0.0602393	Dnaaf3	wild-type
7.5279	0.707963	0.045295	Dnaaf3	wild-type
7.73136	0.75571	0.0767357	Dnaaf3	wild-type
7.93481	0.736882	0.0444227	Dnaaf3	wild-type
8.13827	0.733578	0.052269	Dnaaf3	wild-type
8.34173	0.738683	0.0582315	Dnaaf3	wild-type
8.54518	0.723849	0.0349879	Dnaaf3	wild-type
8.74864	0.74266	0.0207963	Dnaaf3	wild-type
8.9521	0.740197	0.0274367	Dnaaf3	wild-type
9.15555	0.743497	0.0737597	Dnaaf3	wild-type
9.35901	0.744772	0.034737	Dnaaf3	wild-type
9.56247	0.752719	0.0456143	Dnaaf3	wild-type
9.76592	0.773908	0.0575589	Dnaaf3	wild-type
9.96938	0.761123	0.0478945	Dnaaf3	wild-type
10.1728	0.738619	0.0424515	Dnaaf3	wild-type
10.3763	0.774347	0.0663921	Dnaaf3	wild-type
10.5798	0.773382	0.0650881	Dnaaf3	wild-type
10.7832	0.768065	0.0669405	Dnaaf3	wild-type
10.9867	0.774832	0.0532653	Dnaaf3	wild-type
11.1901	0.756161	0.0333984	Dnaaf3	wild-type
11.3936	0.780143	0.0586624	Dnaaf3	wild-type
11.597	0.793897	0.0722857	Dnaaf3	wild-type
11.8005	0.772667	0.0685133	Dnaaf3	wild-type
12.0039	0.76157	0.0503675	Dnaaf3	wild-type
12.2074	0.772134	0.0805354	Dnaaf3	wild-type
12.4109	0.777856	0.0777171	Dnaaf3	wild-type
12.6143	0.77317	0.0504998	Dnaaf3	wild-type
12.8178	0.75101	0.0445455	Dnaaf3	wild-type
13.0212	0.782502	0.0698804	Dnaaf3	wild-type
13.2247	0.752532	0.0543742	Dnaaf3	wild-type
13.4281	0.770803	0.0643335	Dnaaf3	wild-type
13.6316	0.78098	0.0703653	Dnaaf3	wild-type
13.8351	0.764684	0.0418355	Dnaaf3	wild-type
14.0385	0.767939	0.0646621	Dnaaf3	wild-type
14.242	0.758695	0.0638635	Dnaaf3	wild-type
14.4454	0.792495	0.083699	Dnaaf3	wild-type
14.6489	0.753927	0.047157	Dnaaf3	wild-type
14.8523	0.776279	0.0551972	Dnaaf3	wild-type
15.0558	0.768869	0.0707818	Dnaaf3	wild-type
15.2592	0.792673	0.0750457	Dnaaf3	wild-type
15.4627	0.742149	0.0417254	Dnaaf3	wild-type
15.6662	0.760277	0.090173	Dnaaf3	wild-type
15.8696	0.765808	0.0720673	Dnaaf3	wild-type
16.0731	0.758967	0.0726877	Dnaaf3	wild-type
16.2765	0.753155	0.0709843	Dnaaf3	wild-type
16.48	0.77647	0.0996134	Dnaaf3	wild-type
16.6835	0.757108	0.0785988	Dnaaf3	wild-type
16.8869	0.774727	0.0914573	Dnaaf3	wild-type
17.0904	0.771261	0.063054	Dnaaf3	wild-type
17.2938	0.773933	0.0949778	Dnaaf3	wild-type
17.4973	0.796314	0.0961544	Dnaaf3	wild-type
17.7007	0.782408	0.0996089	Dnaaf3	wild-type
17.9042	0.766294	0.0726514	Dnaaf3	wild-type
18.1076	0.780799	0.0882265	Dnaaf3	wild-type
18.3111	0.818527	0.102203	Dnaaf3	wild-type
18.5146	0.789536	0.0801835	Dnaaf3	wild-type
18.718	0.814135	0.0903523	Dnaaf3	wild-type
18.9215	0.765034	0.0686353	Dnaaf3	wild-type
19.1249	0.833604	0.108348	Dnaaf3	wild-type
19.3284	0.807957	0.0913622	Dnaaf3	wild-type
19.5318	0.809368	0.0817922	Dnaaf3	wild-type
19.7353	0.789548	0.100552	Dnaaf3	wild-type
19.9388	0.775755	0.0815291	Dnaaf3	wild-type
20.1422	0.801201	0.102142	Dnaaf3	wild-type
20.3457	0.779265	0.0929654	Dnaaf3	wild-type
20.5491	0.794496	0.0886925	Dnaaf3	wild-type
20.7526	0.791637	0.100632	Dnaaf3	wild-type
20.956	0.780206	0.0962689	Dnaaf3	wild-type
21.1595	0.778532	0.0829989	Dnaaf3	wild-type
21.363	0.80481	0.110636	Dnaaf3	wild-type
21.5664	0.794011	0.107033	Dnaaf3	wild-type
21.7699	0.798787	0.106987	Dnaaf3	wild-type
21.9733	0.800326	0.0912105	Dnaaf3	wild-type
22.1768	0.795812	0.0972398	Dnaaf3	wild-type
22.3802	0.807284	0.104053	Dnaaf3	wild-type
22.5837	0.809365	0.106373	Dnaaf3	wild-type
22.7872	0.780936	0.0686306	Dnaaf3	wild-type
22.9906	0.784628	0.0845478	Dnaaf3	wild-type
23.1941	0.788403	0.0656009	Dnaaf3	wild-type
23.3975	0.801729	0.103667	Dnaaf3	wild-type
23.601	0.789212	0.0892892	Dnaaf3	wild-type
23.8044	0.82435	0.119875	Dnaaf3	wild-type
24.0079	0.810968	0.0858404	Dnaaf3	wild-type
24.2113	0.794277	0.113211	Dnaaf3	wild-type
24.4148	0.825486	0.110753	Dnaaf3	wild-type
24.6183	0.825	0.105217	Dnaaf3	wild-type
24.8217	0.80694	0.0958266	Dnaaf3	wild-type
25.0252	0.824928	0.101644	Dnaaf3	wild-type
25.2286	0.827537	0.109782	Dnaaf3	wild-type
25.4321	0.821808	0.0960111	Dnaaf3	wild-type
25.6355	0.806167	0.104777	Dnaaf3	wild-type
25.839	0.804713	0.0785269	Dnaaf3	wild-type
26.0425	0.827283	0.124362	Dnaaf3	wild-type
26.2459	0.823196	0.118901	Dnaaf3	wild-type
26.4494	0.835429	0.118862	Dnaaf3	wild-type
26.6528	0.821668	0.116639	Dnaaf3	wild-type
26.8563	0.811124	0.0753631	Dnaaf3	wild-type
27.0598	0.786944	0.0561111	Dnaaf3	wild-type
27.2632	0.788942	0.0916116	Dnaaf3	wild-type
27.4667	0.824717	0.101912	Dnaaf3	wild-type
27.6701	0.798909	0.0888926	Dnaaf3	wild-type
27.8736	0.817144	0.0858352	Dnaaf3	wild-type
28.077	0.805319	0.0740007	Dnaaf3	wild-type
28.2805	0.771641	0.0725748	Dnaaf3	wild-type
28.4839	0.817187	0.139792	Dnaaf3	wild-type
28.6874	0.785295	0.0666009	Dnaaf3	wild-type
28.8909	0.801154	0.0982346	Dnaaf3	wild-type
29.0943	0.775958	0.0709249	Dnaaf3	wild-type
29.2978	0.81558	0.10841	Dnaaf3	wild-type
0	0	0	Dnaaf4	wild-type
0.20346	0.0772074	0.0218873	Dnaaf4	wild-type
0.40691	0.129235	0.0299205	Dnaaf4	wild-type
0.61037	0.178164	0.0413662	Dnaaf4	wild-type
0.81383	0.215217	0.0483248	Dnaaf4	wild-type
1.01728	0.2575	0.0526524	Dnaaf4	wild-type
1.22074	0.279891	0.0595662	Dnaaf4	wild-type
1.4242	0.310671	0.065777	Dnaaf4	wild-type
1.62765	0.33345	0.0676888	Dnaaf4	wild-type
1.83111	0.354853	0.0744325	Dnaaf4	wild-type
2.03457	0.375621	0.072475	Dnaaf4	wild-type
2.23802	0.389608	0.072263	Dnaaf4	wild-type
2.44148	0.401763	0.085078	Dnaaf4	wild-type
2.64494	0.415241	0.0818042	Dnaaf4	wild-type
2.84839	0.435051	0.0824216	Dnaaf4	wild-type
3.05185	0.443306	0.0809448	Dnaaf4	wild-type
3.25531	0.459001	0.0868129	Dnaaf4	wild-type
3.45876	0.464998	0.0897972	Dnaaf4	wild-type
3.66222	0.475509	0.0857644	Dnaaf4	wild-type
3.86568	0.494629	0.0966115	Dnaaf4	wild-type
4.06913	0.498358	0.0907126	Dnaaf4	wild-type
4.27259	0.508258	0.0883038	Dnaaf4	wild-type
4.47605	0.511416	0.0923681	Dnaaf4	wild-type
4.6795	0.518578	0.0975571	Dnaaf4	wild-type
4.88296	0.527563	0.0889536	Dnaaf4	wild-type
5.08642	0.524917	0.0920152	Dnaaf4	wild-type
5.28988	0.537137	0.0950789	Dnaaf4	wild-type
5.49333	0.526848	0.0931156	Dnaaf4	wild-type
5.69679	0.536617	0.095112	Dnaaf4	wild-type
5.90025	0.541686	0.0981277	Dnaaf4	wild-type
6.1037	0.543133	0.0973397	Dnaaf4	wild-type
6.30716	0.542539	0.0907997	Dnaaf4	wild-type
6.51062	0.552215	0.103558	Dnaaf4	wild-type
6.71407	0.565358	0.0986703	Dnaaf4	wild-type
6.91753	0.557983	0.0968095	Dnaaf4	wild-type
7.12099	0.560913	0.0970847	Dnaaf4	wild-type
7.32444	0.563908	0.102877	Dnaaf4	wild-type
7.5279	0.577574	0.0976253	Dnaaf4	wild-type
7.73136	0.581636	0.0995824	Dnaaf4	wild-type
7.93481	0.570914	0.0979312	Dnaaf4	wild-type
8.13827	0.572997	0.0905986	Dnaaf4	wild-type
8.34173	0.577503	0.0928774	Dnaaf4	wild-type
8.54518	0.579179	0.0946459	Dnaaf4	wild-type
8.74864	0.583368	0.0977982	Dnaaf4	wild-type
8.9521	0.581514	0.0943208	Dnaaf4	wild-type
9.15555	0.586642	0.103067	Dnaaf4	wild-type
9.35901	0.594947	0.0972867	Dnaaf4	wild-type
9.56247	0.596991	0.101048	Dnaaf4	wild-type
9.76592	0.592681	0.0973056	Dnaaf4	wild-type
9.96938	0.600295	0.092677	Dnaaf4	wild-type
10.1728	0.601295	0.0895802	Dnaaf4	wild-type
10.3763	0.595509	0.093878	Dnaaf4	wild-type
10.5798	0.594565	0.0867599	Dnaaf4	wild-type
10.7832	0.596347	0.088405	Dnaaf4	wild-type
10.9867	0.605449	0.0968644	Dnaaf4	wild-type
11.1901	0.609386	0.0957811	Dnaaf4	wild-type
11.3936	0.604204	0.098457	Dnaaf4	wild-type
11.597	0.599189	0.108744	Dnaaf4	wild-type
11.8005	0.607882	0.104996	Dnaaf4	wild-type
12.0039	0.607934	0.0981202	Dnaaf4	wild-type
12.2074	0.601232	0.0962202	Dnaaf4	wild-type
12.4109	0.609326	0.0988718	Dnaaf4	wild-type
12.6143	0.600121	0.102864	Dnaaf4	wild-type
12.8178	0.600916	0.109477	Dnaaf4	wild-type
13.0212	0.605504	0.0984409	Dnaaf4	wild-type
13.2247	0.617015	0.101524	Dnaaf4	wild-type
13.4281	0.611418	0.0919746	Dnaaf4	wild-type
13.6316	0.617962	0.0949618	Dnaaf4	wild-type
13.8351	0.609852	0.0874048	Dnaaf4	wild-type
14.0385	0.613189	0.0940494	Dnaaf4	wild-type
14.242	0.610981	0.0995736	Dnaaf4	wild-type
14.4454	0.615324	0.104993	Dnaaf4	wild-type
14.6489	0.617049	0.104665	Dnaaf4	wild-type
14.8523	0.619293	0.10596	Dnaaf4	wild-type
15.0558	0.607169	0.106053	Dnaaf4	wild-type
15.2592	0.617933	0.108202	Dnaaf4	wild-type
15.4627	0.61751	0.101007	Dnaaf4	wild-type
15.6662	0.61212	0.108399	Dnaaf4	wild-type
15.8696	0.612913	0.111619	Dnaaf4	wild-type
16.0731	0.606089	0.108391	Dnaaf4	wild-type
16.2765	0.607083	0.110916	Dnaaf4	wild-type
16.48	0.606321	0.103204	Dnaaf4	wild-type
16.6835	0.612691	0.102706	Dnaaf4	wild-type
16.8869	0.610748	0.117187	Dnaaf4	wild-type
17.0904	0.614023	0.109204	Dnaaf4	wild-type
17.2938	0.611904	0.105952	Dnaaf4	wild-type
17.4973	0.623204	0.105828	Dnaaf4	wild-type
17.7007	0.603776	0.0951805	Dnaaf4	wild-type
17.9042	0.62405	0.105683	Dnaaf4	wild-type
18.1076	0.616607	0.10074	Dnaaf4	wild-type
18.3111	0.618557	0.0990453	Dnaaf4	wild-type
18.5146	0.620344	0.106721	Dnaaf4	wild-type
18.718	0.621915	0.103901	Dnaaf4	wild-type
18.9215	0.614833	0.101419	Dnaaf4	wild-type
19.1249	0.610445	0.0964139	Dnaaf4	wild-type
19.3284	0.613449	0.112085	Dnaaf4	wild-type
19.5318	0.61561	0.0980481	Dnaaf4	wild-type
19.7353	0.620177	0.0988635	Dnaaf4	wild-type
19.9388	0.625994	0.0976273	Dnaaf4	wild-type
20.1422	0.618896	0.0963982	Dnaaf4	wild-type
20.3457	0.613617	0.0938498	Dnaaf4	wild-type
20.5491	0.622464	0.099476	Dnaaf4	wild-type
20.7526	0.619179	0.102798	Dnaaf4	wild-type
20.956	0.620401	0.112311	Dnaaf4	wild-type
21.1595	0.613665	0.109218	Dnaaf4	wild-type
21.363	0.623018	0.0992394	Dnaaf4	wild-type
21.5664	0.618862	0.105774	Dnaaf4	wild-type
21.7699	0.617785	0.102731	Dnaaf4	wild-type
21.9733	0.624648	0.114965	Dnaaf4	wild-type
22.1768	0.623719	0.107575	Dnaaf4	wild-type
22.3802	0.624127	0.103732	Dnaaf4	wild-type
22.5837	0.624753	0.103348	Dnaaf4	wild-type
22.7872	0.624982	0.104841	Dnaaf4	wild-type
22.9906	0.625032	0.102093	Dnaaf4	wild-type
23.1941	0.625862	0.098623	Dnaaf4	wild-type
23.3975	0.623092	0.0996606	Dnaaf4	wild-type
23.601	0.627616	0.102736	Dnaaf4	wild-type
23.8044	0.629348	0.0987935	Dnaaf4	wild-type
24.0079	0.629844	0.105975	Dnaaf4	wild-type
24.2113	0.626825	0.103398	Dnaaf4	wild-type
24.4148	0.626704	0.104328	Dnaaf4	wild-type
24.6183	0.627129	0.109478	Dnaaf4	wild-type
24.8217	0.640624	0.112037	Dnaaf4	wild-type
25.0252	0.6284	0.114988	Dnaaf4	wild-type
25.2286	0.632393	0.106787	Dnaaf4	wild-type
25.4321	0.623219	0.108283	Dnaaf4	wild-type
25.6355	0.634239	0.116301	Dnaaf4	wild-type
25.839	0.625895	0.105744	Dnaaf4	wild-type
26.0425	0.642366	0.107902	Dnaaf4	wild-type
26.2459	0.636958	0.112711	Dnaaf4	wild-type
26.4494	0.637757	0.109974	Dnaaf4	wild-type
26.6528	0.625576	0.116444	Dnaaf4	wild-type
26.8563	0.631108	0.106935	Dnaaf4	wild-type
27.0598	0.628545	0.116162	Dnaaf4	wild-type
27.2632	0.635649	0.127892	Dnaaf4	wild-type
27.4667	0.623266	0.124945	Dnaaf4	wild-type
27.6701	0.624556	0.115439	Dnaaf4	wild-type
27.8736	0.626057	0.124545	Dnaaf4	wild-type
28.077	0.627667	0.119944	Dnaaf4	wild-type
28.2805	0.61812	0.116413	Dnaaf4	wild-type
28.4839	0.619811	0.128923	Dnaaf4	wild-type
28.6874	0.620559	0.129684	Dnaaf4	wild-type
28.8909	0.624619	0.119516	Dnaaf4	wild-type
29.0943	0.615374	0.127775	Dnaaf4	wild-type
29.2978	0.621911	0.127071	Dnaaf4	wild-type
0	0	0	Heatr2	wild-type
0.20346	0.0866836	0.0215238	Heatr2	wild-type
0.40691	0.155015	0.0290483	Heatr2	wild-type
0.61037	0.213483	0.0398876	Heatr2	wild-type
0.81383	0.247189	0.0413538	Heatr2	wild-type
1.01728	0.287609	0.0460097	Heatr2	wild-type
1.22074	0.322349	0.0432848	Heatr2	wild-type
1.4242	0.341114	0.0432788	Heatr2	wild-type
1.62765	0.369178	0.0371998	Heatr2	wild-type
1.83111	0.386939	0.0464928	Heatr2	wild-type
2.03457	0.405434	0.0500683	Heatr2	wild-type
2.23802	0.418821	0.0465125	Heatr2	wild-type
2.44148	0.434358	0.0459307	Heatr2	wild-type
2.64494	0.449539	0.0443748	Heatr2	wild-type
2.84839	0.460796	0.0513233	Heatr2	wild-type
3.05185	0.481893	0.0499235	Heatr2	wild-type
3.25531	0.494049	0.058693	Heatr2	wild-type
3.45876	0.493748	0.0682135	Heatr2	wild-type
3.66222	0.494022	0.0568547	Heatr2	wild-type
3.86568	0.515885	0.0649976	Heatr2	wild-type
4.06913	0.517879	0.0533928	Heatr2	wild-type
4.27259	0.516835	0.0605275	Heatr2	wild-type
4.47605	0.535519	0.0631857	Heatr2	wild-type
4.6795	0.522059	0.0636003	Heatr2	wild-type
4.88296	0.521575	0.0577061	Heatr2	wild-type
5.08642	0.536429	0.0644148	Heatr2	wild-type
5.28988	0.536347	0.0682804	Heatr2	wild-type
5.49333	0.548731	0.0600136	Heatr2	wild-type
5.69679	0.54607	0.0715725	Heatr2	wild-type
5.90025	0.555435	0.0696361	Heatr2	wild-type
6.1037	0.555695	0.0721279	Heatr2	wild-type
6.30716	0.563997	0.0600477	Heatr2	wild-type
6.51062	0.551538	0.05758	Heatr2	wild-type
6.71407	0.562546	0.0631233	Heatr2	wild-type
6.91753	0.561565	0.061103	Heatr2	wild-type
7.12099	0.564899	0.0607509	Heatr2	wild-type
7.32444	0.569333	0.0638804	Heatr2	wild-type
7.5279	0.562407	0.0544126	Heatr2	wild-type
7.73136	0.570992	0.0594952	Heatr2	wild-type
7.93481	0.569915	0.0638065	Heatr2	wild-type
8.13827	0.570653	0.0482458	Heatr2	wild-type
8.34173	0.563023	0.0495318	Heatr2	wild-type
8.54518	0.567858	0.0533245	Heatr2	wild-type
8.74864	0.561763	0.0522744	Heatr2	wild-type
8.9521	0.564132	0.0607041	Heatr2	wild-type
9.15555	0.573994	0.048357	Heatr2	wild-type
9.35901	0.579587	0.0626135	Heatr2	wild-type
9.56247	0.576927	0.0610407	Heatr2	wild-type
9.76592	0.578265	0.0590549	Heatr2	wild-type
9.96938	0.581523	0.0596161	Heatr2	wild-type
10.1728	0.589984	0.0657937	Heatr2	wild-type
10.3763	0.596173	0.0709011	Heatr2	wild-type
10.5798	0.601195	0.0780886	Heatr2	wild-type
10.7832	0.596384	0.0689623	Heatr2	wild-type
10.9867	0.590915	0.0548947	Heatr2	wild-type
11.1901	0.600532	0.0628763	Heatr2	wild-type
11.3936	0.594066	0.0538771	Heatr2	wild-type
11.597	0.602726	0.0582841	Heatr2	wild-type
11.8005	0.601516	0.0576802	Heatr2	wild-type
12.0039	0.606267	0.0601654	Heatr2	wild-type
12.2074	0.599151	0.0534402	Heatr2	wild-type
12.4109	0.594777	0.0477023	Heatr2	wild-type
12.6143	0.593462	0.0549755	Heatr2	wild-type
12.8178	0.597398	0.0694722	Heatr2	wild-type
13.0212	0.603051	0.0616905	Heatr2	wild-type
13.2247	0.600876	0.0677664	Heatr2	wild-type
13.4281	0.602837	0.0633005	Heatr2	wild-type
13.6316	0.598798	0.0680924	Heatr2	wild-type
13.8351	0.608559	0.0558645	Heatr2	wild-type
14.0385	0.594238	0.0589132	Heatr2	wild-type
14.242	0.606855	0.0697603	Heatr2	wild-type
14.4454	0.595454	0.0644152	Heatr2	wild-type
14.6489	0.605359	0.065924	Heatr2	wild-type
14.8523	0.611629	0.0733171	Heatr2	wild-type
15.0558	0.601696	0.065458	Heatr2	wild-type
15.2592	0.610049	0.0797266	Heatr2	wild-type
15.4627	0.611765	0.069159	Heatr2	wild-type
15.6662	0.608038	0.0752171	Heatr2	wild-type
15.8696	0.596703	0.0626424	Heatr2	wild-type
16.0731	0.603217	0.0589607	Heatr2	wild-type
16.2765	0.596686	0.0645321	Heatr2	wild-type
16.48	0.608707	0.0750224	Heatr2	wild-type
16.6835	0.59374	0.0609989	Heatr2	wild-type
16.8869	0.600479	0.0631694	Heatr2	wild-type
17.0904	0.600264	0.0614919	Heatr2	wild-type
17.2938	0.603983	0.0660388	Heatr2	wild-type
17.4973	0.606803	0.0818019	Heatr2	wild-type
17.7007	0.60539	0.0673998	Heatr2	wild-type
17.9042	0.602237	0.0636736	Heatr2	wild-type
18.1076	0.610844	0.0683591	Heatr2	wild-type
18.3111	0.597474	0.0562188	Heatr2	wild-type
18.5146	0.608477	0.0702205	Heatr2	wild-type
18.718	0.611133	0.0554691	Heatr2	wild-type
18.9215	0.61618	0.0762892	Heatr2	wild-type
19.1249	0.616305	0.0660487	Heatr2	wild-type
19.3284	0.612545	0.0717451	Heatr2	wild-type
19.5318	0.610521	0.0792926	Heatr2	wild-type
19.7353	0.609934	0.0723687	Heatr2	wild-type
19.9388	0.615779	0.0656684	Heatr2	wild-type
20.1422	0.60173	0.080903	Heatr2	wild-type
20.3457	0.606574	0.0854307	Heatr2	wild-type
20.5491	0.603666	0.0925206	Heatr2	wild-type
20.7526	0.601962	0.0939324	Heatr2	wild-type
20.956	0.600113	0.0997697	Heatr2	wild-type
21.1595	0.600738	0.101106	Heatr2	wild-type
21.363	0.596223	0.100259	Heatr2	wild-type
21.5664	0.600297	0.103177	Heatr2	wild-type
21.7699	0.611487	0.0934626	Heatr2	wild-type
21.9733	0.599577	0.0842592	Heatr2	wild-type
22.1768	0.605983	0.101582	Heatr2	wild-type
22.3802	0.608879	0.100751	Heatr2	wild-type
22.5837	0.616283	0.101716	Heatr2	wild-type
22.7872	0.604395	0.0857892	Heatr2	wild-type
22.9906	0.615138	0.0986302	Heatr2	wild-type
23.1941	0.612962	0.0941702	Heatr2	wild-type
23.3975	0.60656	0.0914223	Heatr2	wild-type
23.601	0.609193	0.0937495	Heatr2	wild-type
23.8044	0.607592	0.0853193	Heatr2	wild-type
24.0079	0.614488	0.0832747	Heatr2	wild-type
24.2113	0.611909	0.0768916	Heatr2	wild-type
24.4148	0.633221	0.065176	Heatr2	wild-type
24.6183	0.619982	0.0746434	Heatr2	wild-type
24.8217	0.619731	0.0728231	Heatr2	wild-type
25.0252	0.625566	0.0730949	Heatr2	wild-type
25.2286	0.619749	0.0684837	Heatr2	wild-type
25.4321	0.627763	0.0695463	Heatr2	wild-type
25.6355	0.630372	0.0610744	Heatr2	wild-type
25.839	0.625201	0.0663868	Heatr2	wild-type
26.0425	0.635738	0.0661072	Heatr2	wild-type
26.2459	0.633661	0.07118	Heatr2	wild-type
26.4494	0.633464	0.0641393	Heatr2	wild-type
26.6528	0.637377	0.0731676	Heatr2	wild-type
26.8563	0.641075	0.0652937	Heatr2	wild-type
27.0598	0.632501	0.0650617	Heatr2	wild-type
27.2632	0.630549	0.06967	Heatr2	wild-type
27.4667	0.638293	0.0700571	Heatr2	wild-type
27.6701	0.63758	0.0783218	Heatr2	wild-type
27.8736	0.6306	0.0695021	Heatr2	wild-type
28.077	0.630911	0.0705021	Heatr2	wild-type
28.2805	0.634806	0.0712579	Heatr2	wild-type
28.4839	0.626763	0.065985	Heatr2	wild-type
28.6874	0.625549	0.0680449	Heatr2	wild-type
28.8909	0.628236	0.0701966	Heatr2	wild-type
29.0943	0.639085	0.0697317	Heatr2	wild-type
29.2978	0.618239	0.0627917	Heatr2	wild-type
0	0	0	Dnai2	wild-type
0.20346	0.068968	0.0193154	Dnai2	wild-type
0.40691	0.109421	0.0309436	Dnai2	wild-type
0.61037	0.130418	0.0313053	Dnai2	wild-type
0.81383	0.142344	0.038701	Dnai2	wild-type
1.01728	0.159105	0.0416979	Dnai2	wild-type
1.22074	0.169132	0.0393036	Dnai2	wild-type
1.4242	0.187337	0.0441836	Dnai2	wild-type
1.62765	0.188432	0.0430922	Dnai2	wild-type
1.83111	0.201076	0.043597	Dnai2	wild-type
2.03457	0.208656	0.0509491	Dnai2	wild-type
2.23802	0.210044	0.0504921	Dnai2	wild-type
2.44148	0.216967	0.0520705	Dnai2	wild-type
2.64494	0.227249	0.0549871	Dnai2	wild-type
2.84839	0.229122	0.0533126	Dnai2	wild-type
3.05185	0.232063	0.0453109	Dnai2	wild-type
3.25531	0.231564	0.0472565	Dnai2	wild-type
3.45876	0.245026	0.0512375	Dnai2	wild-type
3.66222	0.243394	0.0549403	Dnai2	wild-type
3.86568	0.244296	0.051954	Dnai2	wild-type
4.06913	0.245552	0.0503333	Dnai2	wild-type
4.27259	0.24755	0.0562517	Dnai2	wild-type
4.47605	0.250717	0.0637745	Dnai2	wild-type
4.6795	0.247602	0.0521529	Dnai2	wild-type
4.88296	0.252171	0.0596789	Dnai2	wild-type
5.08642	0.256143	0.0508585	Dnai2	wild-type
5.28988	0.256163	0.0513153	Dnai2	wild-type
5.49333	0.255405	0.0579331	Dnai2	wild-type
5.69679	0.257712	0.0534992	Dnai2	wild-type
5.90025	0.253954	0.0542776	Dnai2	wild-type
6.1037	0.263885	0.0531606	Dnai2	wild-type
6.30716	0.262253	0.0542504	Dnai2	wild-type
6.51062	0.266503	0.0594185	Dnai2	wild-type
6.71407	0.272622	0.0621334	Dnai2	wild-type
6.91753	0.267038	0.0695509	Dnai2	wild-type
7.12099	0.268255	0.0717236	Dnai2	wild-type
7.32444	0.268403	0.0551923	Dnai2	wild-type
7.5279	0.267719	0.0653336	Dnai2	wild-type
7.73136	0.26893	0.0671742	Dnai2	wild-type
7.93481	0.269442	0.0576171	Dnai2	wild-type
8.13827	0.270775	0.0648766	Dnai2	wild-type
8.34173	0.274223	0.0697555	Dnai2	wild-type
8.54518	0.271099	0.0657694	Dnai2	wild-type
8.74864	0.27606	0.069487	Dnai2	wild-type
8.9521	0.273863	0.0661463	Dnai2	wild-type
9.15555	0.276002	0.0628968	Dnai2	wild-type
9.35901	0.272121	0.0655016	Dnai2	wild-type
9.56247	0.277766	0.0652842	Dnai2	wild-type
9.76592	0.275782	0.0621444	Dnai2	wild-type
9.96938	0.274379	0.0772319	Dnai2	wild-type
10.1728	0.272554	0.0674134	Dnai2	wild-type
10.3763	0.280578	0.0704584	Dnai2	wild-type
10.5798	0.271398	0.0613593	Dnai2	wild-type
10.7832	0.278684	0.0648214	Dnai2	wild-type
10.9867	0.269777	0.06088	Dnai2	wild-type
11.1901	0.271581	0.0612195	Dnai2	wild-type
11.3936	0.282437	0.0696526	Dnai2	wild-type
11.597	0.271794	0.0636756	Dnai2	wild-type
11.8005	0.278669	0.059624	Dnai2	wild-type
12.0039	0.278707	0.0610777	Dnai2	wild-type
12.2074	0.279852	0.0592855	Dnai2	wild-type
12.4109	0.280192	0.062217	Dnai2	wild-type
12.6143	0.273597	0.0637723	Dnai2	wild-type
12.8178	0.280236	0.0649342	Dnai2	wild-type
13.0212	0.280693	0.0676841	Dnai2	wild-type
13.2247	0.278574	0.0747049	Dnai2	wild-type
13.4281	0.277019	0.0653991	Dnai2	wild-type
13.6316	0.276989	0.0658921	Dnai2	wild-type
13.8351	0.276085	0.0682734	Dnai2	wild-type
14.0385	0.281046	0.062528	Dnai2	wild-type
14.242	0.27586	0.0705227	Dnai2	wild-type
14.4454	0.275519	0.0619362	Dnai2	wild-type
14.6489	0.274781	0.0667435	Dnai2	wild-type
14.8523	0.274516	0.0625472	Dnai2	wild-type
15.0558	0.283034	0.0589015	Dnai2	wild-type
15.2592	0.289098	0.0675664	Dnai2	wild-type
15.4627	0.27978	0.061976	Dnai2	wild-type
15.6662	0.28005	0.075609	Dnai2	wild-type
15.8696	0.287703	0.0765492	Dnai2	wild-type
16.0731	0.281167	0.065068	Dnai2	wild-type
16.2765	0.288989	0.0567767	Dnai2	wild-type
16.48	0.28097	0.0633491	Dnai2	wild-type
16.6835	0.284116	0.0656552	Dnai2	wild-type
16.8869	0.275833	0.0512349	Dnai2	wild-type
17.0904	0.283226	0.0741117	Dnai2	wild-type
17.2938	0.282931	0.0670908	Dnai2	wild-type
17.4973	0.279443	0.0705037	Dnai2	wild-type
17.7007	0.278321	0.0722076	Dnai2	wild-type
17.9042	0.278632	0.0644779	Dnai2	wild-type
18.1076	0.281298	0.0600762	Dnai2	wild-type
18.3111	0.281408	0.0612314	Dnai2	wild-type
18.5146	0.273432	0.0634558	Dnai2	wild-type
18.718	0.285641	0.0590095	Dnai2	wild-type
18.9215	0.282304	0.0561934	Dnai2	wild-type
19.1249	0.293124	0.0642734	Dnai2	wild-type
19.3284	0.28371	0.0643458	Dnai2	wild-type
19.5318	0.28905	0.0597634	Dnai2	wild-type
19.7353	0.287618	0.0704438	Dnai2	wild-type
19.9388	0.287989	0.0664291	Dnai2	wild-type
20.1422	0.284138	0.0611737	Dnai2	wild-type
20.3457	0.282968	0.0570316	Dnai2	wild-type
20.5491	0.272738	0.0660425	Dnai2	wild-type
20.7526	0.282128	0.0659869	Dnai2	wild-type
20.956	0.27737	0.0560097	Dnai2	wild-type
21.1595	0.284427	0.0657188	Dnai2	wild-type
21.363	0.284994	0.0610706	Dnai2	wild-type
21.5664	0.282164	0.0550263	Dnai2	wild-type
21.7699	0.282893	0.0581203	Dnai2	wild-type
21.9733	0.280053	0.0570976	Dnai2	wild-type
22.1768	0.277212	0.059599	Dnai2	wild-type
22.3802	0.278725	0.0520546	Dnai2	wild-type
22.5837	0.272469	0.0549799	Dnai2	wild-type
22.7872	0.277445	0.0553854	Dnai2	wild-type
22.9906	0.275067	0.0520606	Dnai2	wild-type
23.1941	0.275792	0.0610562	Dnai2	wild-type
23.3975	0.27423	0.0614086	Dnai2	wild-type
23.601	0.282542	0.0536688	Dnai2	wild-type
23.8044	0.288743	0.0603307	Dnai2	wild-type
24.0079	0.278621	0.0596238	Dnai2	wild-type
24.2113	0.278708	0.0571733	Dnai2	wild-type
24.4148	0.285031	0.0778956	Dnai2	wild-type
24.6183	0.276942	0.0592848	Dnai2	wild-type
24.8217	0.281378	0.0634471	Dnai2	wild-type
25.0252	0.282071	0.0626902	Dnai2	wild-type
25.2286	0.275202	0.0625116	Dnai2	wild-type
25.4321	0.283374	0.063489	Dnai2	wild-type
25.6355	0.272589	0.0632445	Dnai2	wild-type
25.839	0.270007	0.0611577	Dnai2	wild-type
26.0425	0.266823	0.0527175	Dnai2	wild-type
26.2459	0.276252	0.0592224	Dnai2	wild-type
26.4494	0.281365	0.0583874	Dnai2	wild-type
26.6528	0.276962	0.0577285	Dnai2	wild-type
26.8563	0.268574	0.0610284	Dnai2	wild-type
27.0598	0.27113	0.061026	Dnai2	wild-type
27.2632	0.272578	0.0452395	Dnai2	wild-type
27.4667	0.259005	0.0553435	Dnai2	wild-type
27.6701	0.269977	0.0511135	Dnai2	wild-type
27.8736	0.275759	0.0484213	Dnai2	wild-type
28.077	0.267017	0.0534051	Dnai2	wild-type
28.2805	0.271415	0.0517233	Dnai2	wild-type
28.4839	0.267838	0.0520646	Dnai2	wild-type
28.6874	0.268873	0.0600088	Dnai2	wild-type
28.8909	0.270399	0.0613689	Dnai2	wild-type
29.0943	0.262069	0.0580694	Dnai2	wild-type
29.2978	0.260409	0.0654716	Dnai2	wild-type
0	0	0	Dnaaf2	wild-type
0.2096	0.134276	0.0387951	Dnaaf2	wild-type
0.4192	0.218193	0.049686	Dnaaf2	wild-type
0.6287	0.280135	0.0599314	Dnaaf2	wild-type
0.8383	0.329464	0.0622968	Dnaaf2	wild-type
1.0479	0.367641	0.0632646	Dnaaf2	wild-type
1.2575	0.399074	0.0687838	Dnaaf2	wild-type
1.4671	0.432367	0.0703305	Dnaaf2	wild-type
1.6766	0.458944	0.0720839	Dnaaf2	wild-type
1.8862	0.484282	0.0710567	Dnaaf2	wild-type
2.0958	0.492527	0.0681122	Dnaaf2	wild-type
2.3054	0.519755	0.0690169	Dnaaf2	wild-type
2.515	0.535002	0.0694445	Dnaaf2	wild-type
2.7245	0.547365	0.0748231	Dnaaf2	wild-type
2.9341	0.565618	0.0718036	Dnaaf2	wild-type
3.1437	0.57328	0.0655075	Dnaaf2	wild-type
3.3533	0.584288	0.0701733	Dnaaf2	wild-type
3.5629	0.594181	0.0600347	Dnaaf2	wild-type
3.7724	0.594205	0.0628979	Dnaaf2	wild-type
3.982	0.616797	0.0632087	Dnaaf2	wild-type
4.1916	0.61938	0.0635921	Dnaaf2	wild-type
4.4012	0.624052	0.0655072	Dnaaf2	wild-type
4.6108	0.631549	0.0662399	Dnaaf2	wild-type
4.8203	0.643697	0.0641965	Dnaaf2	wild-type
5.0299	0.649794	0.0625335	Dnaaf2	wild-type
5.2395	0.652735	0.0671793	Dnaaf2	wild-type
5.4491	0.661829	0.0710402	Dnaaf2	wild-type
5.6587	0.665226	0.0677865	Dnaaf2	wild-type
5.8682	0.673994	0.0774001	Dnaaf2	wild-type
6.0778	0.672475	0.0678229	Dnaaf2	wild-type
6.2874	0.683859	0.0708235	Dnaaf2	wild-type
6.497	0.684045	0.0707285	Dnaaf2	wild-type
6.7066	0.686103	0.0591255	Dnaaf2	wild-type
6.9161	0.690921	0.0646224	Dnaaf2	wild-type
7.1257	0.698392	0.0647673	Dnaaf2	wild-type
7.3353	0.699449	0.0666633	Dnaaf2	wild-type
7.5449	0.710855	0.0659198	Dnaaf2	wild-type
7.7545	0.717235	0.0713972	Dnaaf2	wild-type
7.964	0.716684	0.0617736	Dnaaf2	wild-type
8.1736	0.728028	0.0576557	Dnaaf2	wild-type
8.3832	0.723099	0.0660089	Dnaaf2	wild-type
8.5928	0.732868	0.0685757	Dnaaf2	wild-type
8.8023	0.725288	0.0649873	Dnaaf2	wild-type
9.0119	0.731641	0.0624707	Dnaaf2	wild-type
9.2215	0.743532	0.0699748	Dnaaf2	wild-type
9.4311	0.73576	0.0647615	Dnaaf2	wild-type
9.6407	0.742003	0.0754944	Dnaaf2	wild-type
9.8502	0.742409	0.0686503	Dnaaf2	wild-type
10.0598	0.744814	0.0639681	Dnaaf2	wild-type
10.2694	0.745058	0.0720554	Dnaaf2	wild-type
10.479	0.740851	0.064269	Dnaaf2	wild-type
10.6886	0.738531	0.0690893	Dnaaf2	wild-type
10.8981	0.746419	0.0626552	Dnaaf2	wild-type
11.1077	0.74461	0.0605974	Dnaaf2	wild-type
11.3173	0.746343	0.0635392	Dnaaf2	wild-type
11.5269	0.750283	0.0690763	Dnaaf2	wild-type
11.7365	0.754047	0.0602939	Dnaaf2	wild-type
11.946	0.751004	0.0594874	Dnaaf2	wild-type
12.1556	0.752647	0.0754359	Dnaaf2	wild-type
12.3652	0.753322	0.0635995	Dnaaf2	wild-type
12.5748	0.75817	0.0573215	Dnaaf2	wild-type
12.7844	0.760073	0.0615357	Dnaaf2	wild-type
12.9939	0.762004	0.0673383	Dnaaf2	wild-type
13.2035	0.756588	0.0666011	Dnaaf2	wild-type
13.4131	0.762608	0.0606536	Dnaaf2	wild-type
13.6227	0.766659	0.0589579	Dnaaf2	wild-type
13.8323	0.762626	0.0585025	Dnaaf2	wild-type
14.0418	0.765869	0.0652688	Dnaaf2	wild-type
14.2514	0.772167	0.065868	Dnaaf2	wild-type
14.461	0.772748	0.0596437	Dnaaf2	wild-type
14.6706	0.775402	0.0588908	Dnaaf2	wild-type
14.8802	0.768905	0.0643599	Dnaaf2	wild-type
15.0897	0.777751	0.0670337	Dnaaf2	wild-type
15.2993	0.771544	0.068136	Dnaaf2	wild-type
15.5089	0.776168	0.0677901	Dnaaf2	wild-type
15.7185	0.770756	0.0675131	Dnaaf2	wild-type
15.9281	0.773897	0.0736595	Dnaaf2	wild-type
16.1376	0.78016	0.0679596	Dnaaf2	wild-type
16.3472	0.778715	0.0685476	Dnaaf2	wild-type
16.5568	0.781799	0.0667558	Dnaaf2	wild-type
16.7664	0.782278	0.0671603	Dnaaf2	wild-type
16.976	0.77296	0.0676744	Dnaaf2	wild-type
17.1855	0.781034	0.0749724	Dnaaf2	wild-type
17.3951	0.787701	0.0741291	Dnaaf2	wild-type
17.6047	0.779241	0.0697941	Dnaaf2	wild-type
17.8143	0.781158	0.0728315	Dnaaf2	wild-type
18.0239	0.78048	0.0704913	Dnaaf2	wild-type
18.2334	0.786194	0.0658389	Dnaaf2	wild-type
18.443	0.783363	0.072137	Dnaaf2	wild-type
18.6526	0.777568	0.0755743	Dnaaf2	wild-type
18.8622	0.78018	0.066435	Dnaaf2	wild-type
19.0718	0.783764	0.0676404	Dnaaf2	wild-type
19.2813	0.779752	0.0801986	Dnaaf2	wild-type
19.4909	0.782383	0.0652475	Dnaaf2	wild-type
19.7005	0.780398	0.0749709	Dnaaf2	wild-type
19.9101	0.777426	0.0795362	Dnaaf2	wild-type
20.1197	0.773201	0.0804774	Dnaaf2	wild-type
20.3292	0.780518	0.0790242	Dnaaf2	wild-type
20.5388	0.781468	0.0767338	Dnaaf2	wild-type
20.7484	0.775297	0.07612	Dnaaf2	wild-type
20.958	0.775672	0.0820256	Dnaaf2	wild-type
21.1676	0.776143	0.0777696	Dnaaf2	wild-type
21.3771	0.778647	0.0806352	Dnaaf2	wild-type
21.5867	0.782508	0.0825561	Dnaaf2	wild-type
21.7963	0.779581	0.0832151	Dnaaf2	wild-type
22.0059	0.788773	0.0843588	Dnaaf2	wild-type
22.2155	0.783983	0.0885623	Dnaaf2	wild-type
22.425	0.789726	0.0857151	Dnaaf2	wild-type
22.6346	0.798086	0.0896267	Dnaaf2	wild-type
22.8442	0.784555	0.0908953	Dnaaf2	wild-type
23.0538	0.787464	0.0869745	Dnaaf2	wild-type
23.2634	0.788373	0.0916075	Dnaaf2	wild-type
23.4729	0.784328	0.0876409	Dnaaf2	wild-type
23.6825	0.788916	0.0920672	Dnaaf2	wild-type
23.8921	0.782826	0.0927905	Dnaaf2	wild-type
24.1017	0.792862	0.0926355	Dnaaf2	wild-type
24.3113	0.794192	0.0889907	Dnaaf2	wild-type
24.5208	0.790559	0.0858478	Dnaaf2	wild-type
24.7304	0.791193	0.0913625	Dnaaf2	wild-type
24.94	0.788862	0.0931318	Dnaaf2	wild-type
25.1496	0.794057	0.0905381	Dnaaf2	wild-type
25.3591	0.799081	0.0849701	Dnaaf2	wild-type
25.5687	0.796512	0.089293	Dnaaf2	wild-type
25.7783	0.804639	0.08378	Dnaaf2	wild-type
25.9879	0.801764	0.0844136	Dnaaf2	wild-type
26.1975	0.794185	0.0864033	Dnaaf2	wild-type
26.407	0.793585	0.0889389	Dnaaf2	wild-type
26.6166	0.793275	0.0879651	Dnaaf2	wild-type
26.8262	0.787117	0.0813852	Dnaaf2	wild-type
27.0358	0.790704	0.0816925	Dnaaf2	wild-type
27.2454	0.793997	0.0817498	Dnaaf2	wild-type
27.4549	0.790416	0.0774083	Dnaaf2	wild-type
27.6645	0.787296	0.0737919	Dnaaf2	wild-type
27.8741	0.789525	0.081519	Dnaaf2	wild-type
28.0837	0.787033	0.0839673	Dnaaf2	wild-type
28.2933	0.785292	0.0886107	Dnaaf2	wild-type
28.5028	0.78569	0.0831344	Dnaaf2	wild-type
28.7124	0.787702	0.0825846	Dnaaf2	wild-type
28.922	0.792467	0.0861778	Dnaaf2	wild-type
29.1316	0.800762	0.0813852	Dnaaf2	wild-type
29.3412	0.791393	0.0856431	Dnaaf2	wild-type
29.5507	0.793175	0.0824957	Dnaaf2	wild-type
29.7603	0.790808	0.0878377	Dnaaf2	wild-type
29.9699	0.798353	0.0930367	Dnaaf2	wild-type
30.1795	0.798911	0.0875949	Dnaaf2	wild-type
0	0	0	Dnai1	wild-type
0.20346	0.0740944	0.0247114	Dnai1	wild-type
0.40691	0.10927	0.0354387	Dnai1	wild-type
0.61037	0.12624	0.0363552	Dnai1	wild-type
0.81383	0.147713	0.0452646	Dnai1	wild-type
1.01728	0.163649	0.0431363	Dnai1	wild-type
1.22074	0.172049	0.0539374	Dnai1	wild-type
1.4242	0.186074	0.044855	Dnai1	wild-type
1.62765	0.18024	0.046369	Dnai1	wild-type
1.83111	0.200359	0.0493361	Dnai1	wild-type
2.03457	0.202056	0.0454225	Dnai1	wild-type
2.23802	0.20231	0.0528183	Dnai1	wild-type
2.44148	0.214299	0.050412	Dnai1	wild-type
2.64494	0.20414	0.0504116	Dnai1	wild-type
2.84839	0.216083	0.0507792	Dnai1	wild-type
3.05185	0.219083	0.0536713	Dnai1	wild-type
3.25531	0.216898	0.0534672	Dnai1	wild-type
3.45876	0.219232	0.0542168	Dnai1	wild-type
3.66222	0.223498	0.053243	Dnai1	wild-type
3.86568	0.221569	0.0478042	Dnai1	wild-type
4.06913	0.23231	0.0526197	Dnai1	wild-type
4.27259	0.233674	0.0606293	Dnai1	wild-type
4.47605	0.226902	0.0539793	Dnai1	wild-type
4.6795	0.231729	0.0553979	Dnai1	wild-type
4.88296	0.226862	0.049447	Dnai1	wild-type
5.08642	0.238887	0.0512701	Dnai1	wild-type
5.28988	0.233432	0.053068	Dnai1	wild-type
5.49333	0.249049	0.0620975	Dnai1	wild-type
5.69679	0.244802	0.0518491	Dnai1	wild-type
5.90025	0.242159	0.0546724	Dnai1	wild-type
6.1037	0.238049	0.0554928	Dnai1	wild-type
6.30716	0.253161	0.05968	Dnai1	wild-type
6.51062	0.247498	0.0559894	Dnai1	wild-type
6.71407	0.253492	0.0576471	Dnai1	wild-type
6.91753	0.248261	0.0559759	Dnai1	wild-type
7.12099	0.25224	0.0517643	Dnai1	wild-type
7.32444	0.251405	0.0525774	Dnai1	wild-type
7.5279	0.254474	0.0564042	Dnai1	wild-type
7.73136	0.235521	0.0511015	Dnai1	wild-type
7.93481	0.239828	0.054907	Dnai1	wild-type
8.13827	0.250407	0.0567159	Dnai1	wild-type
8.34173	0.241952	0.0533742	Dnai1	wild-type
8.54518	0.256717	0.0510688	Dnai1	wild-type
8.74864	0.249718	0.059137	Dnai1	wild-type
8.9521	0.248032	0.0526481	Dnai1	wild-type
9.15555	0.255572	0.0548004	Dnai1	wild-type
9.35901	0.260334	0.0547177	Dnai1	wild-type
9.56247	0.251324	0.0567296	Dnai1	wild-type
9.76592	0.263059	0.0612851	Dnai1	wild-type
9.96938	0.258938	0.0539066	Dnai1	wild-type
10.1728	0.251767	0.0645473	Dnai1	wild-type
10.3763	0.256736	0.0631972	Dnai1	wild-type
10.5798	0.249799	0.0480767	Dnai1	wild-type
10.7832	0.257368	0.0584887	Dnai1	wild-type
10.9867	0.259778	0.0620459	Dnai1	wild-type
11.1901	0.253735	0.0544196	Dnai1	wild-type
11.3936	0.261522	0.0507947	Dnai1	wild-type
11.597	0.244583	0.0478448	Dnai1	wild-type
11.8005	0.24808	0.0535715	Dnai1	wild-type
12.0039	0.256725	0.0444279	Dnai1	wild-type
12.2074	0.246863	0.0582183	Dnai1	wild-type
12.4109	0.251923	0.0486106	Dnai1	wild-type
12.6143	0.252379	0.0608384	Dnai1	wild-type
12.8178	0.253944	0.0517307	Dnai1	wild-type
13.0212	0.246228	0.0620544	Dnai1	wild-type
13.2247	0.250231	0.0618255	Dnai1	wild-type
13.4281	0.250519	0.0582396	Dnai1	wild-type
13.6316	0.248259	0.0641239	Dnai1	wild-type
13.8351	0.247067	0.0619375	Dnai1	wild-type
14.0385	0.262402	0.0632987	Dnai1	wild-type
14.242	0.256655	0.0641854	Dnai1	wild-type
14.4454	0.247057	0.0540458	Dnai1	wild-type
14.6489	0.252838	0.0551255	Dnai1	wild-type
14.8523	0.256982	0.053074	Dnai1	wild-type
15.0558	0.257953	0.0542153	Dnai1	wild-type
15.2592	0.25982	0.0582794	Dnai1	wild-type
15.4627	0.252948	0.0544852	Dnai1	wild-type
15.6662	0.25819	0.0545968	Dnai1	wild-type
15.8696	0.25592	0.0611712	Dnai1	wild-type
16.0731	0.253644	0.0642361	Dnai1	wild-type
16.2765	0.263367	0.0649655	Dnai1	wild-type
16.48	0.251178	0.0551303	Dnai1	wild-type
16.6835	0.257169	0.0612324	Dnai1	wild-type
16.8869	0.258069	0.0624235	Dnai1	wild-type
17.0904	0.258141	0.0653085	Dnai1	wild-type
17.2938	0.251618	0.0580774	Dnai1	wild-type
17.4973	0.258107	0.0582858	Dnai1	wild-type
17.7007	0.250604	0.0576328	Dnai1	wild-type
17.9042	0.251106	0.0560812	Dnai1	wild-type
18.1076	0.249323	0.0615497	Dnai1	wild-type
18.3111	0.246935	0.0605672	Dnai1	wild-type
18.5146	0.254994	0.0577716	Dnai1	wild-type
18.718	0.250223	0.0648889	Dnai1	wild-type
18.9215	0.25508	0.061985	Dnai1	wild-type
19.1249	0.244506	0.0640658	Dnai1	wild-type
19.3284	0.250178	0.071396	Dnai1	wild-type
19.5318	0.251978	0.0639182	Dnai1	wild-type
19.7353	0.259501	0.0678404	Dnai1	wild-type
19.9388	0.255908	0.06382	Dnai1	wild-type
20.1422	0.256259	0.071708	Dnai1	wild-type
20.3457	0.249889	0.0583167	Dnai1	wild-type
20.5491	0.25274	0.0657647	Dnai1	wild-type
20.7526	0.248898	0.0633485	Dnai1	wild-type
20.956	0.25498	0.0674158	Dnai1	wild-type
21.1595	0.252973	0.0634202	Dnai1	wild-type
21.363	0.25324	0.0753119	Dnai1	wild-type
21.5664	0.254314	0.0706298	Dnai1	wild-type
21.7699	0.254945	0.0686558	Dnai1	wild-type
21.9733	0.24813	0.0645846	Dnai1	wild-type
22.1768	0.259495	0.0702037	Dnai1	wild-type
22.3802	0.253885	0.0673336	Dnai1	wild-type
22.5837	0.252173	0.0696821	Dnai1	wild-type
22.7872	0.263224	0.0716219	Dnai1	wild-type
22.9906	0.256553	0.0733149	Dnai1	wild-type
23.1941	0.260453	0.062145	Dnai1	wild-type
23.3975	0.262132	0.0631513	Dnai1	wild-type
23.601	0.25411	0.0619205	Dnai1	wild-type
23.8044	0.258126	0.0619201	Dnai1	wild-type
24.0079	0.257106	0.0698148	Dnai1	wild-type
24.2113	0.252753	0.0662472	Dnai1	wild-type
24.4148	0.2491	0.0617364	Dnai1	wild-type
24.6183	0.252032	0.0699686	Dnai1	wild-type
24.8217	0.251559	0.0781857	Dnai1	wild-type
25.0252	0.249266	0.0724103	Dnai1	wild-type
25.2286	0.255061	0.0648759	Dnai1	wild-type
25.4321	0.254318	0.0677003	Dnai1	wild-type
25.6355	0.253043	0.0845775	Dnai1	wild-type
25.839	0.253587	0.0714584	Dnai1	wild-type
26.0425	0.250969	0.0653357	Dnai1	wild-type
26.2459	0.255671	0.0686834	Dnai1	wild-type
26.4494	0.247009	0.0740788	Dnai1	wild-type
26.6528	0.24961	0.0628241	Dnai1	wild-type
26.8563	0.249683	0.064252	Dnai1	wild-type
27.0598	0.249049	0.0679721	Dnai1	wild-type
27.2632	0.2439	0.0760086	Dnai1	wild-type
27.4667	0.24943	0.0776443	Dnai1	wild-type
27.6701	0.249437	0.0750326	Dnai1	wild-type
27.8736	0.236911	0.0735408	Dnai1	wild-type
28.077	0.249444	0.0817256	Dnai1	wild-type
28.2805	0.258802	0.0781055	Dnai1	wild-type
28.4839	0.251635	0.0725363	Dnai1	wild-type
28.6874	0.242552	0.0772298	Dnai1	wild-type
28.8909	0.249636	0.0749256	Dnai1	wild-type
29.0943	0.239979	0.0701751	Dnai1	wild-type
29.2978	0.245738	0.0708973	Dnai1	wild-type
0	0	0	Hspa8	wild-type
0.20346	0.0975151	0.0268705	Hspa8	wild-type
0.40691	0.153008	0.0471263	Hspa8	wild-type
0.61037	0.202961	0.0593091	Hspa8	wild-type
0.81383	0.243556	0.0632087	Hspa8	wild-type
1.01728	0.274002	0.0675136	Hspa8	wild-type
1.22074	0.301865	0.0691156	Hspa8	wild-type
1.4242	0.324523	0.0752782	Hspa8	wild-type
1.62765	0.338515	0.0778844	Hspa8	wild-type
1.83111	0.364979	0.075703	Hspa8	wild-type
2.03457	0.377236	0.0786636	Hspa8	wild-type
2.23802	0.39524	0.0894633	Hspa8	wild-type
2.44148	0.415903	0.0985879	Hspa8	wild-type
2.64494	0.423811	0.0942353	Hspa8	wild-type
2.84839	0.440442	0.0971278	Hspa8	wild-type
3.05185	0.445931	0.081834	Hspa8	wild-type
3.25531	0.456209	0.096291	Hspa8	wild-type
3.45876	0.479514	0.0941241	Hspa8	wild-type
3.66222	0.484979	0.0891009	Hspa8	wild-type
3.86568	0.494069	0.0829061	Hspa8	wild-type
4.06913	0.500835	0.0836078	Hspa8	wild-type
4.27259	0.521769	0.0926329	Hspa8	wild-type
4.47605	0.517726	0.0958092	Hspa8	wild-type
4.6795	0.517803	0.0877509	Hspa8	wild-type
4.88296	0.536735	0.0835187	Hspa8	wild-type
5.08642	0.556502	0.102349	Hspa8	wild-type
5.28988	0.563827	0.0909418	Hspa8	wild-type
5.49333	0.56759	0.0891702	Hspa8	wild-type
5.69679	0.577983	0.0964714	Hspa8	wild-type
5.90025	0.577951	0.101514	Hspa8	wild-type
6.1037	0.582985	0.111209	Hspa8	wild-type
6.30716	0.58883	0.106178	Hspa8	wild-type
6.51062	0.59223	0.100034	Hspa8	wild-type
6.71407	0.603345	0.104711	Hspa8	wild-type
6.91753	0.595035	0.105076	Hspa8	wild-type
7.12099	0.576178	0.0986393	Hspa8	wild-type
7.32444	0.604698	0.0988237	Hspa8	wild-type
7.5279	0.610879	0.0967412	Hspa8	wild-type
7.73136	0.615213	0.100125	Hspa8	wild-type
7.93481	0.631995	0.104899	Hspa8	wild-type
8.13827	0.62554	0.109377	Hspa8	wild-type
8.34173	0.630641	0.0988806	Hspa8	wild-type
8.54518	0.635966	0.115477	Hspa8	wild-type
8.74864	0.642042	0.117267	Hspa8	wild-type
8.9521	0.645131	0.0978362	Hspa8	wild-type
9.15555	0.64409	0.0992584	Hspa8	wild-type
9.35901	0.64064	0.107786	Hspa8	wild-type
9.56247	0.638274	0.0984364	Hspa8	wild-type
9.76592	0.629532	0.093717	Hspa8	wild-type
9.96938	0.665113	0.115917	Hspa8	wild-type
10.1728	0.643711	0.101778	Hspa8	wild-type
10.3763	0.649946	0.114406	Hspa8	wild-type
10.5798	0.660043	0.106896	Hspa8	wild-type
10.7832	0.667209	0.111243	Hspa8	wild-type
10.9867	0.650737	0.109797	Hspa8	wild-type
11.1901	0.656257	0.104397	Hspa8	wild-type
11.3936	0.672548	0.103616	Hspa8	wild-type
11.597	0.66104	0.100357	Hspa8	wild-type
11.8005	0.661717	0.0974885	Hspa8	wild-type
12.0039	0.676801	0.0930992	Hspa8	wild-type
12.2074	0.655159	0.094206	Hspa8	wild-type
12.4109	0.659075	0.101517	Hspa8	wild-type
12.6143	0.675512	0.0985928	Hspa8	wild-type
12.8178	0.686525	0.105672	Hspa8	wild-type
13.0212	0.678357	0.110243	Hspa8	wild-type
13.2247	0.685537	0.0897489	Hspa8	wild-type
13.4281	0.675589	0.0954442	Hspa8	wild-type
13.6316	0.694393	0.0825858	Hspa8	wild-type
13.8351	0.691302	0.0895475	Hspa8	wild-type
14.0385	0.695871	0.0847939	Hspa8	wild-type
14.242	0.692398	0.07833	Hspa8	wild-type
14.4454	0.697046	0.0817378	Hspa8	wild-type
14.6489	0.706242	0.0975005	Hspa8	wild-type
14.8523	0.698963	0.0976703	Hspa8	wild-type
15.0558	0.700026	0.100317	Hspa8	wild-type
15.2592	0.697241	0.0975844	Hspa8	wild-type
15.4627	0.695739	0.0832884	Hspa8	wild-type
15.6662	0.697887	0.0970876	Hspa8	wild-type
15.8696	0.685129	0.0871279	Hspa8	wild-type
16.0731	0.702794	0.0975491	Hspa8	wild-type
16.2765	0.724148	0.10394	Hspa8	wild-type
16.48	0.70845	0.101771	Hspa8	wild-type
16.6835	0.726443	0.11044	Hspa8	wild-type
16.8869	0.726069	0.104463	Hspa8	wild-type
17.0904	0.719806	0.097724	Hspa8	wild-type
17.2938	0.736111	0.0979739	Hspa8	wild-type
17.4973	0.728706	0.101456	Hspa8	wild-type
17.7007	0.740307	0.101257	Hspa8	wild-type
17.9042	0.731581	0.107	Hspa8	wild-type
18.1076	0.734627	0.0992599	Hspa8	wild-type
18.3111	0.735465	0.109162	Hspa8	wild-type
18.5146	0.734756	0.102842	Hspa8	wild-type
18.718	0.737548	0.108118	Hspa8	wild-type
18.9215	0.742012	0.107963	Hspa8	wild-type
19.1249	0.750432	0.121239	Hspa8	wild-type
19.3284	0.727887	0.10987	Hspa8	wild-type
19.5318	0.733093	0.0951943	Hspa8	wild-type
19.7353	0.733938	0.105164	Hspa8	wild-type
19.9388	0.744237	0.101974	Hspa8	wild-type
20.1422	0.74437	0.104735	Hspa8	wild-type
20.3457	0.753473	0.118177	Hspa8	wild-type
20.5491	0.745272	0.108944	Hspa8	wild-type
20.7526	0.752012	0.102083	Hspa8	wild-type
20.956	0.757304	0.10927	Hspa8	wild-type
21.1595	0.755428	0.0942128	Hspa8	wild-type
21.363	0.743742	0.108676	Hspa8	wild-type
21.5664	0.765319	0.120656	Hspa8	wild-type
21.7699	0.748918	0.113207	Hspa8	wild-type
21.9733	0.775162	0.103067	Hspa8	wild-type
22.1768	0.753967	0.100207	Hspa8	wild-type
22.3802	0.75068	0.0928847	Hspa8	wild-type
22.5837	0.751301	0.0993714	Hspa8	wild-type
22.7872	0.738551	0.100238	Hspa8	wild-type
22.9906	0.744883	0.106416	Hspa8	wild-type
23.1941	0.747874	0.105334	Hspa8	wild-type
23.3975	0.765829	0.12177	Hspa8	wild-type
23.601	0.75676	0.114934	Hspa8	wild-type
23.8044	0.753252	0.11486	Hspa8	wild-type
24.0079	0.755259	0.11791	Hspa8	wild-type
24.2113	0.724438	0.111681	Hspa8	wild-type
24.4148	0.737993	0.113615	Hspa8	wild-type
24.6183	0.739485	0.115318	Hspa8	wild-type
24.8217	0.749804	0.122793	Hspa8	wild-type
25.0252	0.749398	0.103654	Hspa8	wild-type
25.2286	0.734703	0.10563	Hspa8	wild-type
25.4321	0.726888	0.115864	Hspa8	wild-type
25.6355	0.727561	0.111105	Hspa8	wild-type
25.839	0.713253	0.109119	Hspa8	wild-type
26.0425	0.714453	0.0991482	Hspa8	wild-type
26.2459	0.734243	0.100214	Hspa8	wild-type
26.4494	0.731106	0.117047	Hspa8	wild-type
26.6528	0.723742	0.100189	Hspa8	wild-type
26.8563	0.729046	0.100383	Hspa8	wild-type
27.0598	0.722055	0.110574	Hspa8	wild-type
27.2632	0.730568	0.106382	Hspa8	wild-type
27.4667	0.726151	0.117863	Hspa8	wild-type
27.6701	0.72329	0.122637	Hspa8	wild-type
27.8736	0.731786	0.128635	Hspa8	wild-type
28.077	0.720658	0.129152	Hspa8	wild-type
28.2805	0.732598	0.0940091	Hspa8	wild-type
28.4839	0.714398	0.103315	Hspa8	wild-type
28.6874	0.722905	0.115544	Hspa8	wild-type
28.8909	0.710208	0.106792	Hspa8	wild-type
29.0943	0.710305	0.119579	Hspa8	wild-type
29.2978	0.71396	0.094224	Hspa8	wild-type
0	0	0	Pih1d3	wild-type
0.20346	0.159675	0.033845	Pih1d3	wild-type
0.40691	0.249672	0.0392575	Pih1d3	wild-type
0.61037	0.299222	0.0386819	Pih1d3	wild-type
0.81383	0.321092	0.0573816	Pih1d3	wild-type
1.01728	0.387982	0.0497061	Pih1d3	wild-type
1.22074	0.398947	0.0540409	Pih1d3	wild-type
1.4242	0.420268	0.0638943	Pih1d3	wild-type
1.62765	0.422906	0.0759785	Pih1d3	wild-type
1.83111	0.449024	0.0674265	Pih1d3	wild-type
2.03457	0.471939	0.0663165	Pih1d3	wild-type
2.23802	0.489107	0.0814758	Pih1d3	wild-type
2.44148	0.478705	0.0605171	Pih1d3	wild-type
2.64494	0.504066	0.084015	Pih1d3	wild-type
2.84839	0.524377	0.0718977	Pih1d3	wild-type
3.05185	0.522298	0.0693222	Pih1d3	wild-type
3.25531	0.534246	0.079567	Pih1d3	wild-type
3.45876	0.534731	0.0810735	Pih1d3	wild-type
3.66222	0.554716	0.0761544	Pih1d3	wild-type
3.86568	0.552041	0.0734887	Pih1d3	wild-type
4.06913	0.55301	0.0951725	Pih1d3	wild-type
4.27259	0.545078	0.0732793	Pih1d3	wild-type
4.47605	0.56357	0.0823319	Pih1d3	wild-type
4.6795	0.583465	0.0512303	Pih1d3	wild-type
4.88296	0.547754	0.0743408	Pih1d3	wild-type
5.08642	0.570833	0.0770118	Pih1d3	wild-type
5.28988	0.568491	0.0864321	Pih1d3	wild-type
5.49333	0.59045	0.0984053	Pih1d3	wild-type
5.69679	0.586989	0.0685705	Pih1d3	wild-type
5.90025	0.59588	0.0798893	Pih1d3	wild-type
6.1037	0.592687	0.0740399	Pih1d3	wild-type
6.30716	0.594527	0.0893381	Pih1d3	wild-type
6.51062	0.594704	0.0949685	Pih1d3	wild-type
6.71407	0.586617	0.0778343	Pih1d3	wild-type
6.91753	0.596146	0.0930781	Pih1d3	wild-type
7.12099	0.593039	0.0660416	Pih1d3	wild-type
7.32444	0.609053	0.0783823	Pih1d3	wild-type
7.5279	0.591012	0.0526329	Pih1d3	wild-type
7.73136	0.602127	0.0996505	Pih1d3	wild-type
7.93481	0.609135	0.0824278	Pih1d3	wild-type
8.13827	0.612054	0.0835643	Pih1d3	wild-type
8.34173	0.609352	0.0687488	Pih1d3	wild-type
8.54518	0.608089	0.0939012	Pih1d3	wild-type
8.74864	0.616898	0.0885472	Pih1d3	wild-type
8.9521	0.59253	0.0807916	Pih1d3	wild-type
9.15555	0.603653	0.09477	Pih1d3	wild-type
9.35901	0.607697	0.0754552	Pih1d3	wild-type
9.56247	0.622087	0.0845016	Pih1d3	wild-type
9.76592	0.624996	0.0801007	Pih1d3	wild-type
9.96938	0.601789	0.0710943	Pih1d3	wild-type
10.1728	0.617707	0.0721556	Pih1d3	wild-type
10.3763	0.62584	0.0626028	Pih1d3	wild-type
10.5798	0.636765	0.0818939	Pih1d3	wild-type
10.7832	0.614626	0.0793646	Pih1d3	wild-type
10.9867	0.636199	0.0694509	Pih1d3	wild-type
11.1901	0.604265	0.0619055	Pih1d3	wild-type
11.3936	0.613029	0.0830531	Pih1d3	wild-type
11.597	0.631658	0.0875902	Pih1d3	wild-type
11.8005	0.633333	0.064271	Pih1d3	wild-type
12.0039	0.627774	0.0762559	Pih1d3	wild-type
12.2074	0.655117	0.0590198	Pih1d3	wild-type
12.4109	0.631085	0.0712577	Pih1d3	wild-type
12.6143	0.618063	0.0792281	Pih1d3	wild-type
12.8178	0.628825	0.0872904	Pih1d3	wild-type
13.0212	0.617995	0.0762478	Pih1d3	wild-type
13.2247	0.649071	0.0911802	Pih1d3	wild-type
13.4281	0.640557	0.0761695	Pih1d3	wild-type
13.6316	0.620501	0.0769356	Pih1d3	wild-type
13.8351	0.618702	0.0779596	Pih1d3	wild-type
14.0385	0.626585	0.0889237	Pih1d3	wild-type
14.242	0.628456	0.0777315	Pih1d3	wild-type
14.4454	0.619606	0.0772273	Pih1d3	wild-type
14.6489	0.584003	0.0911314	Pih1d3	wild-type
14.8523	0.603198	0.0538523	Pih1d3	wild-type
15.0558	0.601093	0.0720351	Pih1d3	wild-type
15.2592	0.589985	0.068259	Pih1d3	wild-type
15.4627	0.601931	0.0544441	Pih1d3	wild-type
15.6662	0.599353	0.0675806	Pih1d3	wild-type
15.8696	0.600194	0.0872249	Pih1d3	wild-type
16.0731	0.638622	0.0645569	Pih1d3	wild-type
16.2765	0.613367	0.0582947	Pih1d3	wild-type
16.48	0.618241	0.0561	Pih1d3	wild-type
16.6835	0.613157	0.0748256	Pih1d3	wild-type
16.8869	0.609195	0.0429293	Pih1d3	wild-type
17.0904	0.611852	0.0766762	Pih1d3	wild-type
17.2938	0.621559	0.0524124	Pih1d3	wild-type
17.4973	0.631602	0.0875389	Pih1d3	wild-type
17.7007	0.621971	0.0553574	Pih1d3	wild-type
17.9042	0.633547	0.0954751	Pih1d3	wild-type
18.1076	0.634987	0.0511327	Pih1d3	wild-type
18.3111	0.616886	0.090802	Pih1d3	wild-type
18.5146	0.619422	0.100037	Pih1d3	wild-type
18.718	0.639741	0.0746079	Pih1d3	wild-type
18.9215	0.623745	0.0814114	Pih1d3	wild-type
19.1249	0.638816	0.0812581	Pih1d3	wild-type
19.3284	0.63209	0.113508	Pih1d3	wild-type
19.5318	0.613099	0.102356	Pih1d3	wild-type
19.7353	0.613339	0.0777997	Pih1d3	wild-type
19.9388	0.619267	0.0908445	Pih1d3	wild-type
20.1422	0.615032	0.0936384	Pih1d3	wild-type
20.3457	0.631023	0.104492	Pih1d3	wild-type
20.5491	0.624054	0.108536	Pih1d3	wild-type
20.7526	0.607193	0.0935057	Pih1d3	wild-type
20.956	0.595699	0.11048	Pih1d3	wild-type
21.1595	0.618282	0.101564	Pih1d3	wild-type
21.363	0.623962	0.109223	Pih1d3	wild-type
21.5664	0.618912	0.101966	Pih1d3	wild-type
21.7699	0.607356	0.0980808	Pih1d3	wild-type
21.9733	0.611339	0.0681842	Pih1d3	wild-type
22.1768	0.636612	0.0707284	Pih1d3	wild-type
22.3802	0.618452	0.0843202	Pih1d3	wild-type
22.5837	0.641686	0.0884282	Pih1d3	wild-type
22.7872	0.648789	0.106326	Pih1d3	wild-type
22.9906	0.643989	0.0825194	Pih1d3	wild-type
23.1941	0.628698	0.0948099	Pih1d3	wild-type
23.3975	0.624501	0.0840427	Pih1d3	wild-type
23.601	0.639667	0.0929361	Pih1d3	wild-type
23.8044	0.626392	0.0694225	Pih1d3	wild-type
24.0079	0.620124	0.0908513	Pih1d3	wild-type
24.2113	0.646696	0.12387	Pih1d3	wild-type
24.4148	0.628522	0.0791424	Pih1d3	wild-type
24.6183	0.630854	0.0850288	Pih1d3	wild-type
24.8217	0.651716	0.101897	Pih1d3	wild-type
25.0252	0.642732	0.0996913	Pih1d3	wild-type
25.2286	0.638595	0.0965035	Pih1d3	wild-type
25.4321	0.623888	0.0898222	Pih1d3	wild-type
25.6355	0.642559	0.0735685	Pih1d3	wild-type
25.839	0.639627	0.0893316	Pih1d3	wild-type
26.0425	0.60174	0.0806918	Pih1d3	wild-type
26.2459	0.626084	0.0995827	Pih1d3	wild-type
26.4494	0.626363	0.0899286	Pih1d3	wild-type
26.6528	0.611837	0.0735432	Pih1d3	wild-type
26.8563	0.629754	0.0982071	Pih1d3	wild-type
27.0598	0.613217	0.0847863	Pih1d3	wild-type
27.2632	0.62444	0.0919435	Pih1d3	wild-type
27.4667	0.634959	0.0890057	Pih1d3	wild-type
27.6701	0.625624	0.0971344	Pih1d3	wild-type
27.8736	0.608757	0.10533	Pih1d3	wild-type
28.077	0.609295	0.0939183	Pih1d3	wild-type
28.2805	0.620291	0.0726833	Pih1d3	wild-type
28.4839	0.599393	0.0774295	Pih1d3	wild-type
28.6874	0.628612	0.100035	Pih1d3	wild-type
28.8909	0.590963	0.0819691	Pih1d3	wild-type
29.0943	0.584438	0.0979642	Pih1d3	wild-type
29.2978	0.607548	0.114848	Pih1d3	wild-type
