# Supplementary figures and images for: A liquid-like organelle at the root of motile ciliopathy
Source: eLife journal article supplement (doi:10.7554/elife.38497), 2018-12-18

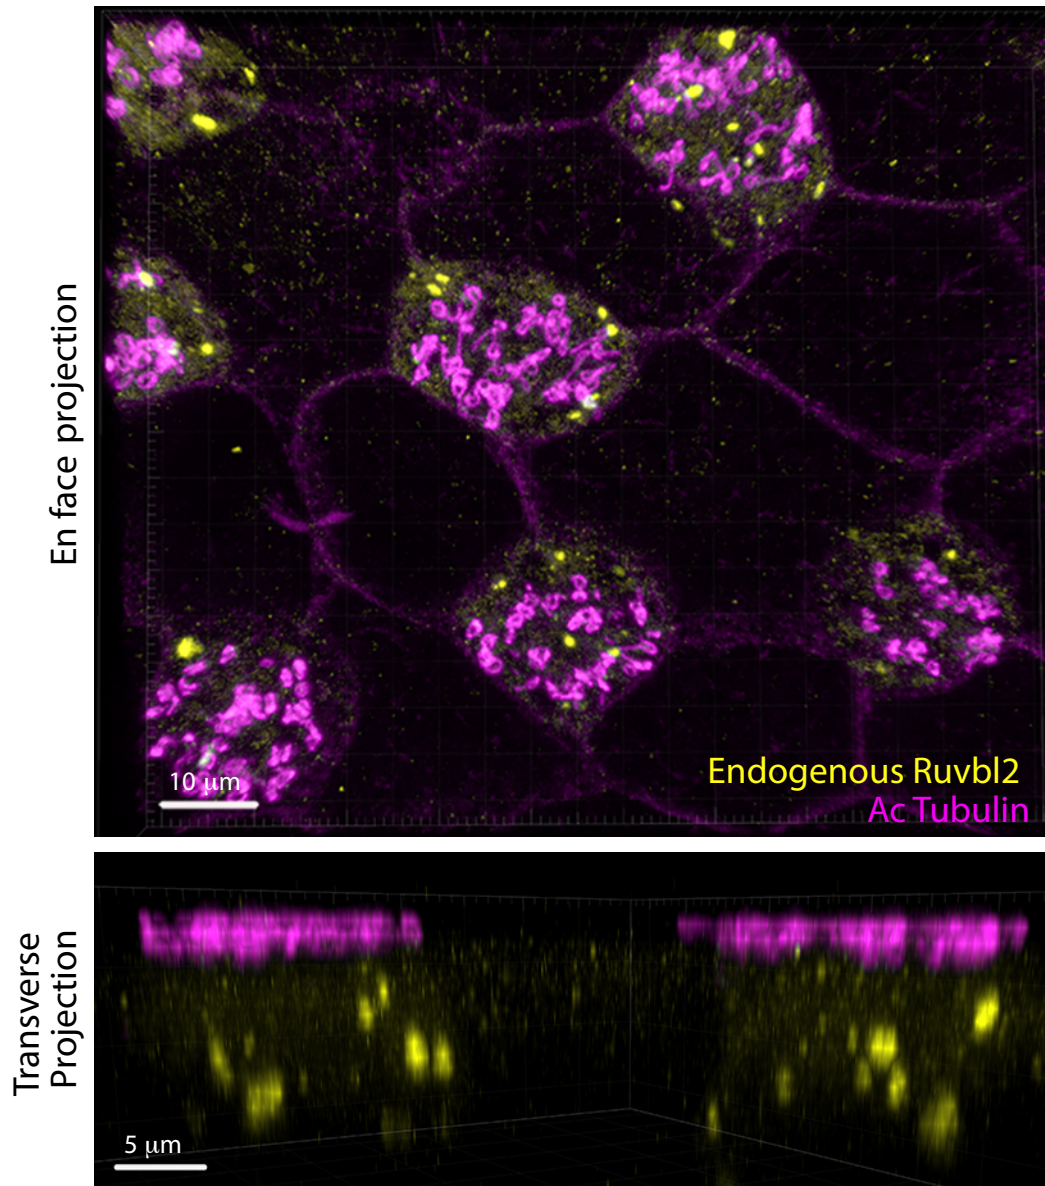

Supplement: supp [file elife-38497-supp-v1.zip]

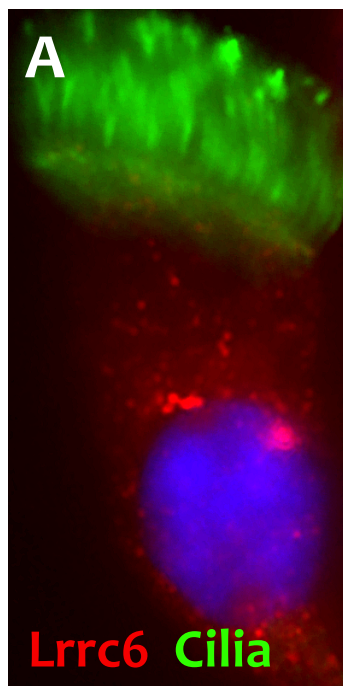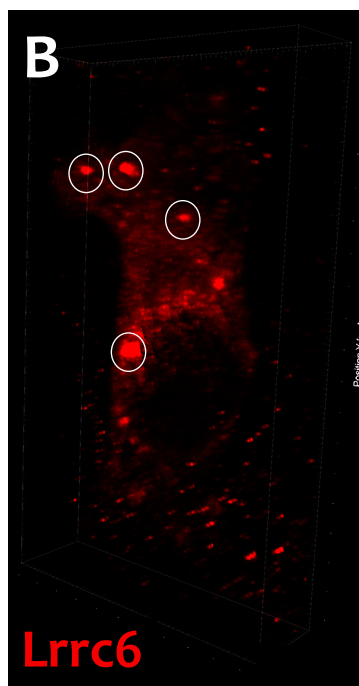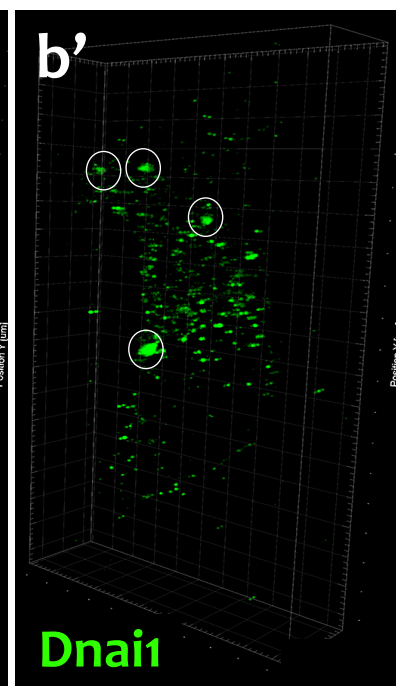

Supplement: supp [file elife-38497-supp-v1.zip]

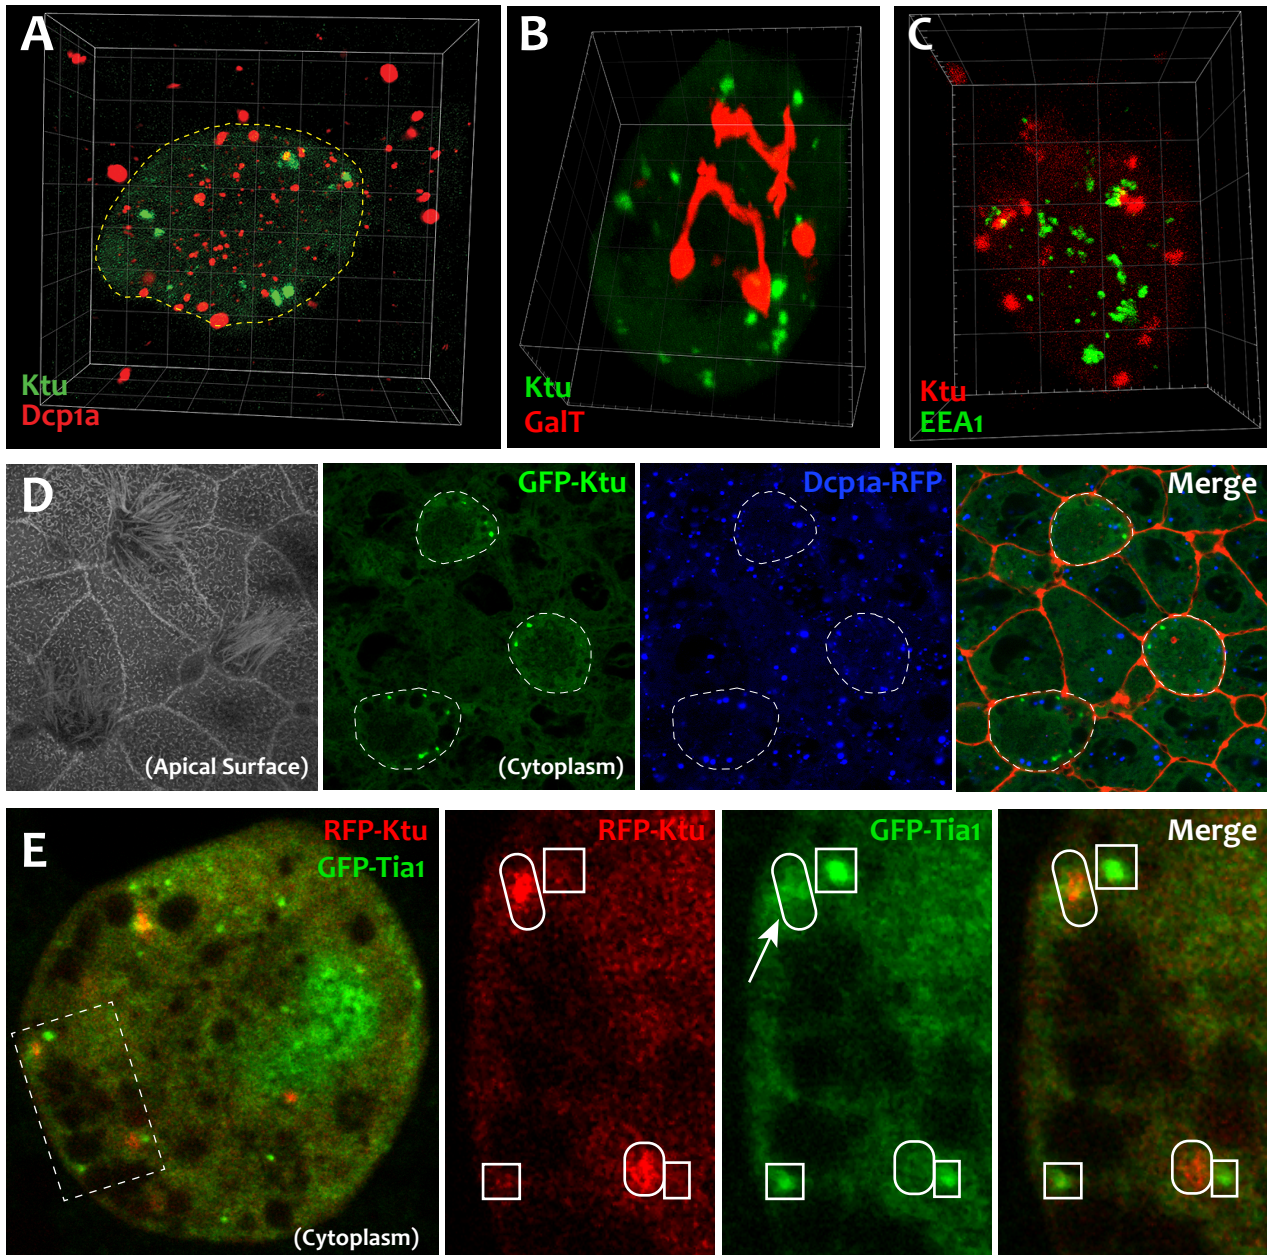

Supplement: supp [file elife-38497-supp-v1.zip]

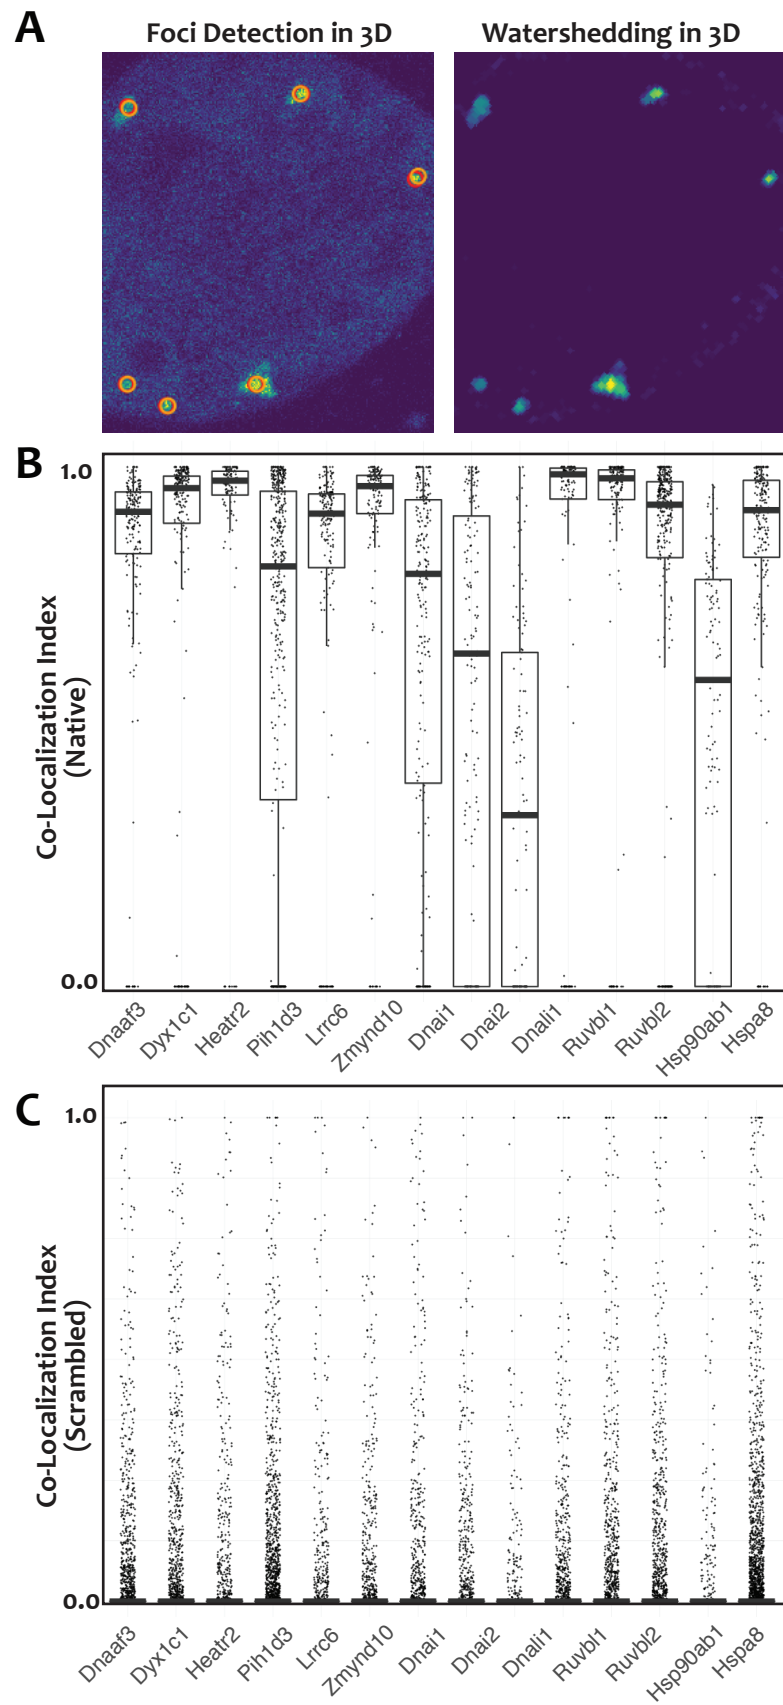

Supplement: supp [file elife-38497-supp-v1.zip]

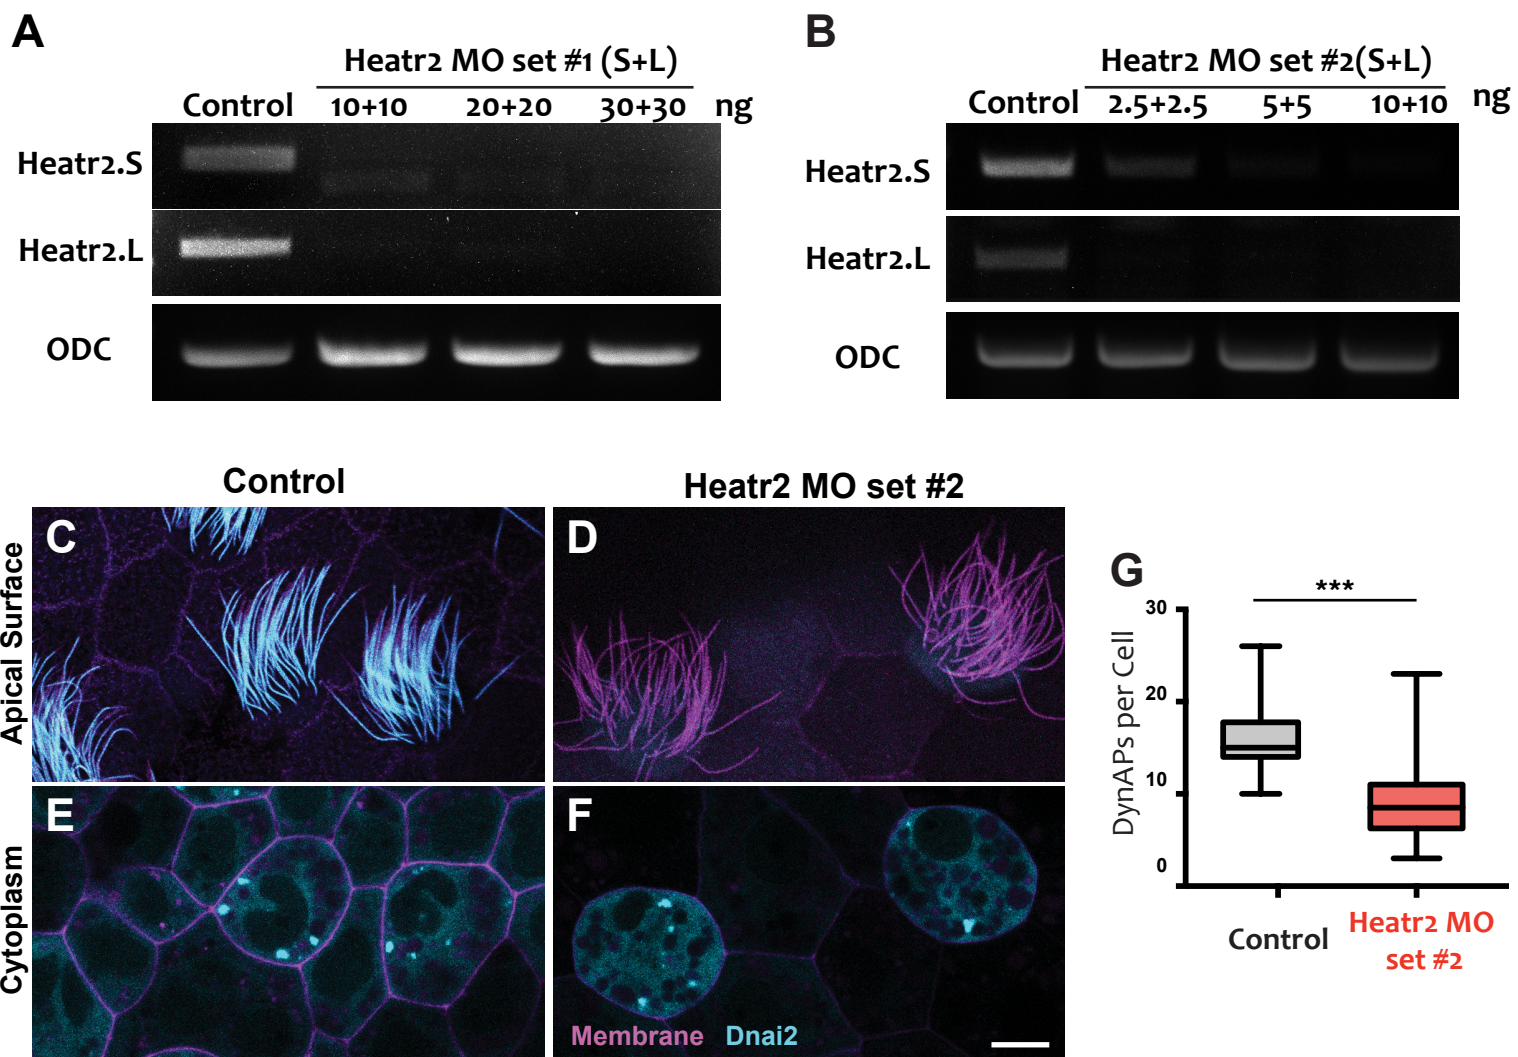

Supplement: supp [file elife-38497-supp-v1.zip]
